# Supplementary material for: Satellite tracking reveals a new migration route of black-necked cranes (Grus nigricollis) in Qinghai-Tibet Plateau
Source: PeerJ. 2020 Aug 19;8:e9715. doi: 10.7717/peerj.9715 (PMC7443078; doi:10.7717/peerj.9715)
Supplement: Supplemental Information 3 — The raw data was used for statistical analysis of the article, and migration period can be found in Table 2. [file peerj-08-9715-s003.xlsx]

## Sheet: Sheet1
Terminal	Time	EW	Longitude	NS	Latitude	Speed	Course	Altitude	Temperature	Voltage	PrecisionGrade
Crane No.1	2016-04-10	E	94.4429	N	29.3913	0	346.5	2963	10.25	4.051	A
Crane No.1	2016-04-10 01:00:00	E	94.4429	N	29.3914	0	4.9	2925.3	9.25	4.045	A
Crane No.1	2016-04-10 02:00:00	E	94.4429	N	29.3915	0	0	2927.4	8.25	4.041	A
Crane No.1	2016-04-10 03:00:00	E	94.4429	N	29.3913	0	0	2940.4	8.25	4.037	A
Crane No.1	2016-04-10 04:00:00	E	94.4429	N	29.3914	0	149.3	2921.5	20.25	4.035	A
Crane No.1	2016-04-10 05:00:00	E	94.4429	N	29.3914	0	183.3	2915	20	4.032	A
Crane No.1	2016-04-10 06:00:00	E	94.4429	N	29.3914	0	340	2918.9	14	4.029	A
Crane No.1	2016-04-10 07:00:00	E	94.4428	N	29.3914	0	218.8	2911.6	8.25	4.025	A
Crane No.1	2016-04-10 08:00:00	E	94.3639	N	29.3175	66	241.1	2933.4	12	4.021	A
Crane No.1	2016-04-10 09:01:00	E	94.2927	N	29.2745	0	347.8	2916.4	13.25	4.018	B
Crane No.1	2016-04-10 10:01:00	E	94.2927	N	29.2746	0	210.5	2928.5	14	4.023	B
Crane No.1	2016-04-10 12:00:00	E	94.2929	N	29.2743	0	270	2940.6	18.25	4.028	A
Crane No.1	2016-04-10 13:01:00	E	94.299	N	29.2783	1.6	25.1	2884.3	18	4.041	B
Crane No.1	2016-04-10 14:00:00	E	94.4524	N	29.4424	87.5	358.7	3169.1	17	4.035	B
Crane No.1	2016-04-10 15:01:00	E	94.2394	N	29.7547	64.8	315.1	3990.3	11	4.031	B
Crane No.1	2016-04-10 16:01:00	E	94.1209	N	29.8655	56.3	335.1	5760.3	3	4.038	B
Crane No.1	2016-04-10 17:00:00	E	93.9773	N	30.2001	0	54.3	3506.7	15.25	4.008	B
Crane No.1	2016-04-10 18:00:00	E	94.0079	N	30.1298	2.2	66.1	3498.3	14	4.012	A
Crane No.1	2016-04-10 19:01:00	E	94.0053	N	30.1271	0	289.2	3468.4	15	4.008	B
Crane No.1	2016-04-10 20:00:00	E	94	N	30.1365	0	305.2	3448.4	14	3.998	A
Crane No.1	2016-04-10 21:00:00	E	94	N	30.1317	0	162.2	3482.8	12	3.995	A
Crane No.1	2016-04-10 22:00:00	E	94	N	30.1318	0	286.9	3486.1	11.25	3.991	B
Crane No.1	2016-04-10 23:00:00	E	93.9998	N	30.1318	0	0	3458.7	11.25	3.987	B
Crane No.1	2016-04-11	E	94	N	30.1319	0	302.7	3480.2	9.25	3.983	A
Crane No.1	2016-04-11 01:00:00	E	94.0001	N	30.1317	0	0	3490.5	9.25	3.977	B
Crane No.1	2016-04-11 02:00:00	E	94.0001	N	30.1317	0	199	3469	8	3.974	A
Crane No.1	2016-04-11 03:00:00	E	94.0002	N	30.1316	0	116.9	3486.6	18.25	3.973	B
Crane No.1	2016-04-11 04:00:00	E	94.0001	N	30.1316	0	298.7	3475	6	3.971	A
Crane No.1	2016-04-11 05:00:00	E	94.0001	N	30.1317	0	0	3486.2	5.25	3.966	B
Crane No.1	2016-04-11 06:00:00	E	93.9999	N	30.1318	0	327.7	3486.8	5.25	3.96	A
Crane No.1	2016-04-11 07:00:00	E	93.9997	N	30.1316	0	0	3430.1	5.25	3.957	A
Crane No.1	2016-04-11 08:01:00	E	94.0141	N	30.1202	0	69	3477.1	8.24	3.953	B
Crane No.1	2016-04-11 09:01:00	E	94.0143	N	30.12	0	64.1	3485.6	10	3.937	B
Crane No.1	2016-04-11 10:01:00	E	94.0082	N	30.1197	0	254	3458.3	15	3.949	B
Crane No.1	2016-04-11 11:00:00	E	94.0087	N	30.1197	0	10.7	3459.8	12.25	3.965	B
Crane No.1	2016-04-11 12:00:00	E	94.0005	N	30.135	0	287.7	3480.8	19	3.971	B
Crane No.1	2016-04-11 13:00:00	E	94.0108	N	30.1224	0	321	3479.6	17.25	3.977	B
Crane No.1	2016-04-11 15:00:00	E	94.0066	N	30.127	0	129.3	3491	12	3.976	B
Crane No.1	2016-04-11 16:00:00	E	94.0073	N	30.1293	3	60.6	3456.1	15	3.975	A
Crane No.1	2016-04-11 17:00:00	E	94.0073	N	30.129	0	329.1	3486.1	24.25	3.989	B
Crane No.1	2016-04-11 18:00:00	E	94.0042	N	30.1177	5.3	81.5	3509.6	12.25	3.983	A
Crane No.1	2016-04-11 20:00:00	E	94.0002	N	30.1335	0	269.7	3440.8	15	3.972	A
Crane No.1	2016-04-11 21:00:00	E	93.9999	N	30.1317	0	0	3480.1	11.25	3.968	B
Crane No.1	2016-04-11 22:00:00	E	94.0002	N	30.1318	0	231.7	3490.4	10.25	3.964	A
Crane No.1	2016-04-11 23:00:00	E	93.9998	N	30.1318	0	283.1	3462	8.25	3.959	A
Crane No.1	2016-04-12	E	93.9999	N	30.1318	0	320.5	3495.3	5.25	3.954	A
Crane No.1	2016-04-12 01:00:00	E	93.9999	N	30.1318	0	147	3495.3	5.25	3.949	B
Crane No.1	2016-04-12 02:00:00	E	93.9998	N	30.1319	0	154.6	3478.2	4	3.942	A
Crane No.1	2016-04-12 03:00:00	E	93.9999	N	30.1318	0	0	3485.3	3.25	3.937	B
Crane No.1	2016-04-12 04:00:00	E	93.9999	N	30.1318	0	0	3467.7	3	3.931	A
Crane No.1	2016-04-12 05:00:00	E	93.9998	N	30.1318	0	0	3485.8	1.25	3.927	A
Crane No.1	2016-04-12 06:00:00	E	93.9999	N	30.1318	0	0	3482.1	2	3.922	B
Crane No.1	2016-04-12 07:00:00	E	94.0001	N	30.1318	0	175	3491.9	2	3.917	B
Crane No.1	2016-04-12 08:00:00	E	93.9996	N	30.1317	0	290.4	3471.9	2	3.911	A
Crane No.1	2016-04-12 09:01:00	E	94.0264	N	30.0793	0	17.9	3485.1	9	3.914	B
Crane No.1	2016-04-12 10:00:00	E	94.0254	N	30.0817	0	282.7	3459.3	12.24	3.92	A
Crane No.1	2016-04-12 12:00:00	E	94.0065	N	30.1543	66.5	5.3	4263.8	10	3.922	A
Crane No.1	2016-04-12 13:00:00	E	93.9716	N	30.2035	0	302.7	3481.2	15	3.934	A
Crane No.1	2016-04-12 14:00:00	E	93.9728	N	30.2033	0	237.2	3504.2	17.25	3.943	B
Crane No.1	2016-04-12 15:00:00	E	93.9723	N	30.2033	0	337.2	3503	18	3.956	B
Crane No.1	2016-04-12 16:00:00	E	94.0088	N	30.1276	0	97.2	3464.4	14	3.943	A
Crane No.1	2016-04-12 17:00:00	E	94.0108	N	30.1226	0	280.2	3467.6	15	3.957	A
Crane No.1	2016-04-12 18:00:00	E	94.0109	N	30.1226	0	49.3	3479.8	15	3.953	A
Crane No.1	2016-04-12 19:00:00	E	94.0085	N	30.1251	0	0	3466.2	14	3.946	B
Crane No.1	2016-04-12 20:00:00	E	94.0008	N	30.134	0	70	3466	10	3.922	A
Crane No.1	2016-04-12 21:00:00	E	94	N	30.1319	0	141.1	3482.5	7.25	3.918	A
Crane No.1	2016-04-12 22:00:00	E	94.0002	N	30.1319	0	312.1	3560.1	21	3.914	B
Crane No.1	2016-04-12 23:00:00	E	94	N	30.1319	0	287.7	3463.9	20	3.91	A
Crane No.1	2016-04-13	E	94.0001	N	30.1318	2.8	261	3499	25.25	3.906	A
Crane No.1	2016-04-13 01:00:00	E	94.0001	N	30.1319	0	228.1	3512.2	22	3.902	B
Crane No.1	2016-04-13 02:00:00	E	94.0001	N	30.132	0	269.3	3450.4	25.25	3.897	A
Crane No.1	2016-04-13 03:00:00	E	94.0001	N	30.1319	0	150	3480.9	25.25	3.894	B
Crane No.1	2016-04-13 04:00:00	E	93.9998	N	30.1319	0	276.9	3447.3	20	3.89	A
Crane No.1	2016-04-13 05:00:00	E	94.0001	N	30.1319	0	34	3477.6	21.25	3.886	B
Crane No.1	2016-04-13 06:00:00	E	94.0001	N	30.1318	0	199	3488.9	3.25	3.883	A
Crane No.1	2016-04-13 07:00:00	E	93.9999	N	30.1319	0	0	3433.7	2.25	3.877	A
Crane No.1	2016-04-13 09:01:00	E	94.0025	N	30.1287	0	0	3518.2	7	3.872	B
Crane No.1	2016-04-13 10:00:00	E	94.0026	N	30.1289	0	328.7	3446.2	12.25	3.882	A
Crane No.1	2016-04-13 11:00:00	E	94.0028	N	30.1293	0	39.1	3476	18.25	3.894	B
Crane No.1	2016-04-13 12:01:00	E	94.01	N	30.1271	0	320.7	3464.7	16	3.902	B
Crane No.1	2016-04-13 14:00:00	E	94.0016	N	30.134	0	98.9	3491.5	15	3.911	A
Crane No.1	2016-04-13 15:01:00	E	94.0008	N	30.1342	0	310.6	3497.5	14.25	3.917	B
Crane No.1	2016-04-13 16:00:00	E	94.0083	N	30.1274	0	128.1	3484.1	18	3.925	B
Crane No.1	2016-04-13 18:00:00	E	94.0104	N	30.1275	0	296.5	3482.3	14.25	3.918	A
Crane No.1	2016-04-13 19:01:00	E	94.0084	N	30.1302	0	238.1	3468.2	15.25	3.908	B
Crane No.1	2016-04-13 20:00:00	E	94.0004	N	30.1327	0	298.3	3474.8	10.25	3.897	A
Crane No.1	2016-04-13 21:00:00	E	94.0002	N	30.1318	0	332.7	3482.4	7.25	3.89	A
Crane No.1	2016-04-13 23:00:00	E	94.0001	N	30.1318	0	0	3443.2	7.25	3.88	A
Crane No.1	2016-04-14	E	94.0002	N	30.1318	0	146.8	3482.4	6.25	3.876	A
Crane No.1	2016-04-14 01:00:00	E	94.0002	N	30.1318	0	210.5	3491.2	7	3.872	B
Crane No.1	2016-04-14 02:00:00	E	94.0002	N	30.1318	0	329.4	3485.9	6.25	3.868	A
Crane No.1	2016-04-14 03:00:00	E	94.0002	N	30.1318	0	9.3	3481.1	21.25	3.867	B
Crane No.1	2016-04-14 04:00:00	E	94.0002	N	30.1318	0	354.5	3478.4	21	3.866	A
Crane No.1	2016-04-14 05:00:00	E	94.0002	N	30.1318	0	350.9	3484.7	20.25	3.863	A
Crane No.1	2016-04-14 06:00:00	E	94.0001	N	30.1318	0	0	3497	25.25	3.861	A
Crane No.1	2016-04-14 07:00:00	E	94	N	30.1317	0	215.9	3464.9	11	3.86	A
Crane No.1	2016-04-14 08:01:00	E	93.9379	N	30.1572	4.8	273.7	187.4	6.25	3.857	B
Crane No.1	2016-04-14 09:01:00	E	94.0081	N	30.1298	0	215.6	3398.4	12.25	3.858	B
Crane No.1	2016-04-14 10:00:00	E	94.0079	N	30.1294	0	131.3	3486.5	11	3.858	B
Crane No.1	2016-04-14 11:00:00	E	94.0079	N	30.1299	0	319.8	3509.8	14.25	3.85	B
Crane No.1	2016-04-14 12:00:00	E	94.0011	N	30.1358	0	315.5	3477.9	15	3.862	B
Crane No.1	2016-04-14 13:00:00	E	94.0011	N	30.1344	0	178.2	3499.4	9	3.861	A
Crane No.1	2016-04-14 14:01:00	E	94.0023	N	30.1347	0	302.6	3492.3	5.25	3.857	B
Crane No.1	2016-04-14 15:00:00	E	94.008	N	30.1295	0	282	3513.8	13.25	3.861	A
Crane No.1	2016-04-14 16:00:00	E	94.0082	N	30.1289	0	327.9	3482.4	11.25	3.858	B
Crane No.1	2016-04-14 17:00:00	E	94	N	30.1333	38.8	234.5	3467.3	12.25	3.852	A
Crane No.1	2016-04-14 18:00:00	E	94	N	30.1337	0	0	3496.5	4.25	3.847	B
Crane No.1	2016-04-14 19:00:00	E	94.0015	N	30.1346	0	68.8	3707.6	5.25	3.843	A
Crane No.1	2016-04-14 20:00:00	E	94.0005	N	30.1336	0	0	3462.2	3	3.839	A
Crane No.1	2016-04-14 21:00:00	E	94	N	30.1318	0	0	3498.1	2.25	3.837	B
Crane No.1	2016-04-14 22:11:00	E	94.0003	N	30.1319	0	80.6	3536.3	13.25	3.832	C
Crane No.1	2016-04-14 23:00:00	E	94.0002	N	30.1319	0	308.4	3467.5	2.25	3.831	A
Crane No.1	2016-04-15	E	94.0003	N	30.1318	0	159.9	3519.3	2.25	3.828	A
Crane No.1	2016-04-15 01:00:00	E	94.0003	N	30.1319	0	0	3492.5	3	3.827	B
Crane No.1	2016-04-15 02:00:00	E	94.0003	N	30.132	0	0	3450.1	2.25	3.824	A
Crane No.1	2016-04-15 03:00:00	E	94.0002	N	30.1319	0	199.9	3493.4	2	3.821	A
Crane No.1	2016-04-15 04:00:00	E	94.0003	N	30.132	0	0	3472.4	2.25	3.82	A
Crane No.1	2016-04-15 05:00:00	E	94.0003	N	30.132	0	114.5	3485.7	3	3.818	B
Crane No.1	2016-04-15 06:00:00	E	94.0002	N	30.132	0	95	3477.4	2.25	3.816	A
Crane No.1	2016-04-15 07:00:00	E	94.0002	N	30.1319	0	69.1	3472.2	2.25	3.814	B
Crane No.1	2016-04-15 08:01:00	E	93.9836	N	30.2013	0	164.5	3447.8	8.25	3.813	B
Crane No.1	2016-04-15 09:00:00	E	93.9827	N	30.2001	0	0	3519.2	14.25	3.815	B
Crane No.1	2016-04-15 10:00:00	E	93.9734	N	30.2043	0	0	3501.5	15.25	3.835	B
Crane No.1	2016-04-15 11:00:00	E	93.9731	N	30.2042	0	282.4	3501.4	22.25	3.834	A
Crane No.1	2016-04-15 12:00:00	E	93.965	N	30.2269	47.8	42.6	4905.4	8.25	3.836	A
Crane No.1	2016-04-15 13:03:00	E	94.0784	N	30.5532	92.2	59.4	5959.5	0	3.836	D
Crane No.1	2016-04-15 14:01:00	E	94.6789	N	31.0174	80.5	50	5561.4	5.25	3.825	B
Crane No.1	2016-04-15 15:00:00	E	95.3591	N	31.3455	78.1	31.4	5583.2	10.24	3.821	B
Crane No.1	2016-04-15 16:00:00	E	95.6779	N	31.6031	0	180	4583.7	5.24	3.822	B
Crane No.1	2016-04-15 17:00:00	E	95.6738	N	31.6017	0	0	4577.3	2	3.832	A
Crane No.1	2016-04-15 18:00:00	E	95.6738	N	31.6019	0	0	4585.5	0.24	3.835	A
Crane No.1	2016-04-15 19:01:00	E	95.6782	N	31.6057	0	344.4	4598.4	0	3.832	B
Crane No.1	2016-04-15 20:00:00	E	95.6783	N	31.6056	0	143.8	4577.7	-2	3.823	A
Crane No.1	2016-04-15 21:00:00	E	95.6783	N	31.6055	0	291.1	4590.9	8	3.821	A
Crane No.1	2016-04-15 22:00:00	E	95.6783	N	31.6055	0	0	4593	-2	3.819	B
Crane No.1	2016-04-15 23:00:00	E	95.6783	N	31.6056	0	181	4604.4	-3.72	3.815	A
Crane No.1	2016-04-16	E	95.6783	N	31.6055	0	216.8	4605.7	-3	3.813	A
Crane No.1	2016-04-16 01:00:00	E	95.6782	N	31.6055	0	259.3	4586.1	14	3.812	A
Crane No.1	2016-04-16 02:00:00	E	95.6783	N	31.6055	0	331	4598.6	18.24	3.813	A
Crane No.1	2016-04-16 03:00:00	E	95.6783	N	31.6055	0	0	4580.5	18	3.813	B
Crane No.1	2016-04-16 04:00:00	E	95.6783	N	31.6055	0	264.5	4591.9	9.24	3.813	A
Crane No.1	2016-04-16 05:00:00	E	95.6783	N	31.6054	0	2.8	4588.4	7.24	3.812	A
Crane No.1	2016-04-16 06:00:00	E	95.6783	N	31.6055	0	0	4593.5	7.24	3.81	B
Crane No.1	2016-04-16 07:00:00	E	95.6783	N	31.6055	0	302.1	4587.8	-4	3.809	A
Crane No.1	2016-04-16 08:00:00	E	95.6783	N	31.6056	0	59.1	4588.6	4	3.813	A
Crane No.1	2016-04-16 09:00:00	E	95.6781	N	31.6055	0	0	4578.8	10.24	3.87	A
Crane No.1	2016-04-16 10:00:00	E	95.678	N	31.6055	0	239	4573.5	13.24	3.871	A
Crane No.1	2016-04-16 11:00:00	E	95.7048	N	31.7563	55.1	0.2	5728.9	7	3.839	B
Crane No.1	2016-04-16 12:01:00	E	95.871	N	32.1858	66.6	64.8	5788.9	5.25	3.835	B
Crane No.1	2016-04-16 13:00:00	E	96.2262	N	32.6093	85.6	21.1	5980	-3.75	3.828	B
Crane No.1	2016-04-16 14:00:00	E	96.6512	N	33.0879	100.3	52.5	5619.7	-1.75	3.82	A
Crane No.1	2016-04-16 15:00:00	E	97.2607	N	33.4834	74.7	23.7	5977.3	-6.75	3.815	A
Crane No.1	2016-04-16 16:00:00	E	97.8807	N	33.9833	73.3	57	5211.7	5	3.813	A
Crane No.1	2016-04-16 17:00:00	E	98.4473	N	34.251	47.5	35.2	4738.2	2.24	3.804	A
Crane No.1	2016-04-16 18:00:00	E	98.7054	N	34.2016	0	132.9	4249.8	2	3.859	A
Crane No.1	2016-04-16 19:00:00	E	98.7053	N	34.2015	0	287.6	4236	-3.72	3.833	A
Crane No.1	2016-04-16 20:00:00	E	98.7054	N	34.2015	0	154	4243.8	-2.72	3.815	A
Crane No.1	2016-04-16 21:00:00	E	98.7046	N	34.2011	3.4	119.1	4254.4	0.24	3.812	A
Crane No.1	2016-04-16 22:00:00	E	98.7046	N	34.201	0	0	4235.6	-3	3.81	B
Crane No.1	2016-04-16 23:00:00	E	98.7045	N	34.201	0	7.6	4239.5	-8.72	3.806	A
Crane No.1	2016-04-17	E	98.7045	N	34.201	0	349.8	4241.4	-4.72	3.805	B
Crane No.1	2016-04-17 01:00:00	E	98.7045	N	34.201	0	348.1	4244.1	-7.72	3.804	A
Crane No.1	2016-04-17 02:00:00	E	98.7045	N	34.201	3.5	307	4241.7	8.24	3.802	A
Crane No.1	2016-04-17 03:00:00	E	98.7045	N	34.201	0	212.6	4250.3	-8	3.804	B
Crane No.1	2016-04-17 04:00:00	E	98.7045	N	34.201	0	3.4	4242.9	-7.72	3.801	A
Crane No.1	2016-04-17 05:00:00	E	98.7046	N	34.2011	0	198.9	4255.7	2.24	3.801	A
Crane No.1	2016-04-17 06:00:00	E	98.7045	N	34.201	0	289.2	4236.2	-9	3.8	A
Crane No.1	2016-04-17 07:00:00	E	98.7045	N	34.201	0	196.2	4246.2	-0.72	3.799	A
Crane No.1	2016-04-17 08:00:00	E	98.7045	N	34.201	0	300.6	4233.4	-6	3.884	A
Crane No.1	2016-04-17 09:00:00	E	98.7045	N	34.201	0	20.9	4242.4	2.24	3.911	A
Crane No.1	2016-04-17 10:00:00	E	98.7043	N	34.2012	0	44.3	4220.7	2	3.891	A
Crane No.1	2016-04-17 11:01:00	E	98.7415	N	34.4974	34.1	358.5	4334.9	3	3.84	B
Crane No.1	2016-04-17 12:00:00	E	98.8177	N	34.835	67.8	343.7	5541.1	-4	3.833	B
Crane No.1	2016-04-17 13:00:00	E	98.776	N	35.2399	64.6	335.3	4217.5	1.24	3.828	B
Crane No.1	2016-04-17 14:00:00	E	98.8028	N	35.3472	53.9	14.8	6076	1	3.839	A
Crane No.1	2016-04-17 15:00:00	E	99.0212	N	35.7745	54.2	16.6	4932.3	2	3.817	B
Crane No.1	2016-04-17 16:00:00	E	99.3341	N	36.1995	35.6	45.5	5550.4	-6.75	3.815	A
Crane No.1	2016-04-17 17:00:00	E	99.3464	N	36.5705	18.6	252.4	3167.8	11.25	3.813	A
Crane No.1	2016-04-17 18:00:00	E	99.2836	N	36.5818	0	0	3075	10	3.859	B
Crane No.1	2016-04-17 19:00:00	E	99.2821	N	36.5806	0	173.8	3077.7	10.25	3.885	A
Crane No.1	2016-04-17 20:00:00	E	99.2824	N	36.5802	0	252.9	3067.3	3	3.853	A
Crane No.1	2016-04-17 21:00:00	E	99.2845	N	36.588	0	183.9	3076.8	0.72	3.844	A
Crane No.1	2016-04-17 22:01:00	E	99.2843	N	36.5877	0	330.3	3075	0.24	3.838	B
Crane No.1	2016-04-17 23:00:00	E	99.2846	N	36.5877	0	167	3071.6	12	3.821	B
Crane No.2	2016-04-08	E	94.4385	N	29.3821	0	258.7	2912.4	24	4.247	B
Crane No.2	2016-04-08 01:00:00	E	94.4384	N	29.3821	0	246.9	2925.2	20	4.231	B
Crane No.2	2016-04-08 02:00:00	E	94.4385	N	29.3822	0	0	2925.4	24.25	4.227	A
Crane No.2	2016-04-08 03:00:00	E	94.4386	N	29.3823	0	114.4	2910.9	25	4.222	A
Crane No.2	2016-04-08 04:00:00	E	94.4385	N	29.3822	0	230.3	2934.5	20.25	4.218	A
Crane No.2	2016-04-08 05:00:00	E	94.4385	N	29.3822	0	111	2909	25.25	4.214	B
Crane No.2	2016-04-08 06:00:00	E	94.4385	N	29.3822	0	276.3	2923.1	20.25	4.209	A
Crane No.2	2016-04-08 07:00:00	E	94.4385	N	29.382	0	275.7	2914.2	23.25	4.206	A
Crane No.2	2016-04-08 08:00:00	E	94.4313	N	29.3646	2.2	136.3	2930.3	22	4.2	A
Crane No.2	2016-04-08 09:01:00	E	94.4305	N	29.3644	0	330.4	2841.6	21	4.2	B
Crane No.2	2016-04-08 10:00:00	E	94.4314	N	29.3639	0	0	2938.5	25	4.205	B
Crane No.2	2016-04-08 11:01:00	E	94.4517	N	29.4645	63.1	303.8	3229	16	4.241	B
Crane No.2	2016-04-08 12:01:00	E	94.3098	N	29.722	72.8	286.9	3726.7	16	4.257	C
Crane No.2	2016-04-08 13:03:00	Unknow	1000	Unknow	1000	0	0	0	12.25	4.3	Invalid
Crane No.2	2016-04-08 14:02:00	E	94.0019	N	30.1387	70.9	344.6	4159.8	14	4.264	C
Crane No.2	2016-04-08 14:29:00	E	94.0132	N	30.1082	3.5	12.8	3506.9	18	4.186	C
Crane No.2	2016-04-08 14:40:00	E	94.0132	N	30.1083	0	340.9	3491.3	20.25	4.194	C
Crane No.2	2016-04-08 14:52:00	E	94.0131	N	30.1084	0	64.6	3506.9	18.25	4.191	C
Crane No.2	2016-04-08 15:00:00	E	94.0129	N	30.1086	0	289.9	3496.8	17.25	4.211	A
Crane No.2	2016-04-08 16:01:00	E	94.0123	N	30.1078	1.8	153.7	3502	21.25	4.243	B
Crane No.2	2016-04-08 17:03:00	Unknow	1000	Unknow	1000	0	0	0	19.25	4.246	Invalid
Crane No.2	2016-04-08 18:02:00	E	94.0451	N	30.096	4.8	96	185.4	21	4.25	C
Crane No.2	2016-04-08 19:03:00	Unknow	1000	Unknow	1000	0	0	0	13.25	4.235	Invalid
Crane No.2	2016-04-08 20:01:00	E	94.0254	N	30.0831	0	117.2	3444.4	15	4.22	C
Crane No.2	2016-04-08 21:00:00	E	94.0003	N	30.132	2.1	285.9	3487	18.25	4.211	B
Crane No.2	2016-04-08 22:01:00	E	94.0004	N	30.1318	2.2	93	3541.7	24.25	4.206	B
Crane No.2	2016-04-08 23:00:00	E	94.0002	N	30.1319	0	0	3487.1	25	4.2	B
Crane No.2	2016-04-09	E	94.0002	N	30.1319	0	47.5	3475.7	25	4.195	B
Crane No.2	2016-04-09 01:00:00	E	94.0001	N	30.1319	0	263.9	3455.6	22.25	4.184	A
Crane No.2	2016-04-09 02:03:00	E	94.0003	N	30.1317	0	121.8	3470.5	25	4.18	D
Crane No.2	2016-04-09 03:01:00	E	94.0001	N	30.1318	0	184.8	3491.4	20.25	4.171	B
Crane No.2	2016-04-09 04:00:00	E	94.0001	N	30.1318	0	311.3	3468	20.25	4.166	A
Crane No.2	2016-04-09 05:00:00	E	94.0002	N	30.1319	0	125.5	3487.2	20.25	4.163	B
Crane No.2	2016-04-09 06:00:00	E	94.0002	N	30.1318	0	0	3503.4	20	4.159	A
Crane No.2	2016-04-09 07:01:00	E	94.0003	N	30.132	0	25.4	3510.3	25.25	4.156	B
Crane No.2	2016-04-09 08:01:00	E	94.0252	N	30.0545	0	147.5	3465.4	15.25	4.154	C
Crane No.2	2016-04-09 09:00:00	E	94.0232	N	30.0527	0	0	3477.4	22.25	4.147	A
Crane No.2	2016-04-09 10:01:00	E	94.0254	N	30.0549	0	0	3471.7	25	4.15	B
Crane No.2	2016-04-09 11:01:00	E	94.0266	N	30.0526	0	39.7	3471.5	22	4.149	C
Crane No.2	2016-04-09 12:01:00	E	94.0097	N	30.1178	12.6	2.1	3791.4	19	4.211	C
Crane No.2	2016-04-09 13:01:00	E	94.012	N	30.0946	0	0	3461	25.24	4.218	B
Crane No.2	2016-04-09 14:02:00	E	94.0128	N	30.0938	0	147.4	3476.3	31	4.256	C
Crane No.2	2016-04-09 15:02:00	E	94.0168	N	30.0839	0	184.3	3458.2	25.25	4.266	C
Crane No.2	2016-04-09 16:02:00	E	94.0138	N	30.0869	0	99.6	3504	21.25	4.26	C
Crane No.2	2016-04-09 17:01:00	E	94.0136	N	30.0869	0	345.8	3443.1	25.25	4.262	B
Crane No.2	2016-04-09 18:01:00	E	94.0121	N	30.0943	0	107.6	3496.9	23.25	4.254	B
Crane No.2	2016-04-09 19:03:00	Unknow	1000	Unknow	1000	0	0	0	24.24	4.244	Invalid
Crane No.2	2016-04-09 20:00:00	E	94.014	N	30.0955	0	172.2	3490.4	21.24	4.23	B
Crane No.2	2016-04-09 21:01:00	E	94.0003	N	30.1321	0	83.9	3490.1	22.24	4.222	B
Crane No.2	2016-04-09 22:03:00	E	94.0005	N	30.132	0	179	3386.2	22	4.215	D
Crane No.2	2016-04-09 23:00:00	E	94.0004	N	30.132	0	140.8	3459.1	20	4.203	A
Crane No.2	2016-04-10	E	94.0004	N	30.132	0	13.4	3464.7	25.24	4.199	A
Crane No.2	2016-04-10 01:00:00	E	94.0003	N	30.1318	0	309.9	3488.9	23.25	4.188	A
Crane No.2	2016-04-10 02:00:00	E	94.0002	N	30.1317	0	117	3478.8	21.25	4.184	B
Crane No.2	2016-04-10 03:00:00	E	94.0003	N	30.1319	0	0	3481.4	20	4.181	B
Crane No.2	2016-04-10 04:00:00	E	94.0002	N	30.1319	0	9.3	3463.9	25.25	4.176	A
Crane No.2	2016-04-10 05:00:00	E	94.0003	N	30.1317	0	320.8	3435.1	25	4.172	B
Crane No.2	2016-04-10 06:00:00	E	94.0002	N	30.1319	0	129.9	3457.4	25	4.169	B
Crane No.2	2016-04-10 07:00:00	E	94.0003	N	30.1319	0	226.2	3481	24	4.164	B
Crane No.2	2016-04-10 08:01:00	E	94.0141	N	30.1201	0	41.4	3553.1	17	4.162	B
Crane No.2	2016-04-10 09:03:00	Unknow	1000	Unknow	1000	0	0	0	23.25	4.156	Invalid
Crane No.2	2016-04-10 10:01:00	E	94.0057	N	30.1221	0	353.7	3367.4	16.25	4.157	B
Crane No.2	2016-04-10 11:01:00	E	94.0068	N	30.122	0	0	3515.3	28	4.166	B
Crane No.2	2016-04-10 12:00:00	E	94.0007	N	30.1351	0	286.3	3489.8	21	4.203	A
Crane No.2	2016-04-10 13:03:00	Unknow	1000	Unknow	1000	0	0	0	17	4.242	Invalid
Crane No.2	2016-04-10 14:03:00	Unknow	1000	Unknow	1000	0	0	0	12.24	4.255	Invalid
Crane No.2	2016-04-10 15:03:00	Unknow	1000	Unknow	1000	0	0	0	2	4.254	Invalid
Crane No.2	2016-04-10 16:03:00	Unknow	1000	Unknow	1000	0	0	0	9.25	4.251	Invalid
Crane No.2	2016-04-10 17:03:00	Unknow	1000	Unknow	1000	0	0	0	-2	4.245	Invalid
Crane No.2	2016-04-10 18:03:00	Unknow	1000	Unknow	1000	0	0	0	6	4.247	Invalid
Crane No.2	2016-04-10 19:03:00	Unknow	1000	Unknow	1000	0	0	0	9.24	4.237	Invalid
Crane No.2	2016-04-10 20:03:00	Unknow	1000	Unknow	1000	0	0	0	5	4.219	Invalid
Crane No.2	2016-04-10 21:03:00	Unknow	1000	Unknow	1000	0	0	0	12	4.204	Invalid
Crane No.2	2016-04-10 22:03:00	Unknow	1000	Unknow	1000	0	0	0	18.25	4.188	Invalid
Crane No.2	2016-04-10 23:00:00	E	97.5481	N	33.3761	0	163.8	4162.5	18.25	4.179	B
Crane No.2	2016-04-11	E	97.5485	N	33.3758	0	5.9	4121.6	16	4.175	A
Crane No.2	2016-04-11 01:00:00	E	97.5483	N	33.376	0	10.4	4181	20.25	4.165	A
Crane No.2	2016-04-11 02:00:00	E	97.5484	N	33.3759	0	77.4	4186.7	20.25	4.162	A
Crane No.2	2016-04-11 03:00:00	E	97.5483	N	33.376	0	301	4183.3	18.25	4.159	A
Crane No.2	2016-04-11 04:00:00	E	97.5484	N	33.3759	0	170.1	4162.7	21	4.155	A
Crane No.2	2016-04-11 05:00:00	E	97.5483	N	33.3759	0	312.4	4165.9	22	4.151	A
Crane No.2	2016-04-11 06:00:00	E	97.5484	N	33.376	0	0	4167.9	22	4.146	A
Crane No.2	2016-04-11 07:00:00	E	97.5486	N	33.3758	0	215.3	4162.9	19.25	4.142	A
Crane No.2	2016-04-11 08:00:00	E	97.5486	N	33.3758	0	281	4167.6	20.25	4.139	B
Crane No.2	2016-04-11 09:00:00	E	97.5529	N	33.3735	0	257	4173.6	20	4.139	A
Crane No.2	2016-04-11 10:00:00	E	97.5572	N	33.3835	1.7	247.1	4163.7	20	4.145	A
Crane No.2	2016-04-11 11:01:00	E	97.553	N	33.386	1.6	105.2	4187.9	23.25	4.3	B
Crane No.2	2016-04-11 12:03:00	Unknow	1000	Unknow	1000	0	0	0	13	4.226	Invalid
Crane No.2	2016-04-11 13:01:00	E	97.7716	N	33.6776	50.3	8.2	4473.8	10.25	4.242	C
Crane No.2	2016-04-11 14:01:00	E	98.1668	N	34.1253	72.4	25.1	5756.8	6.24	4.248	B
Crane No.2	2016-04-11 15:06:00	Unknow	1000	Unknow	1000	0	0	0	9.24	4.245	Invalid
Crane No.2	2016-04-11 16:06:00	Unknow	1000	Unknow	1000	0	0	0	3	4.244	Invalid
Crane No.2	2016-04-11 17:06:00	Unknow	1000	Unknow	1000	0	0	0	8.25	4.239	Invalid
Crane No.2	2016-04-11 18:06:00	Unknow	1000	Unknow	1000	0	0	0	5.25	4.238	Invalid
Crane No.2	2016-04-11 19:06:00	Unknow	1000	Unknow	1000	0	0	0	6	4.234	Invalid
Crane No.2	2016-04-11 20:01:00	E	99.8137	N	36.3809	0	327.2	2954	16	4.183	B
Crane No.2	2016-04-11 21:00:00	E	99.8007	N	36.3902	0	175.3	2949.7	20	4.175	A
Crane No.2	2016-04-11 22:00:00	E	99.8007	N	36.3902	0	243.8	2968.8	21	4.152	A
Crane No.2	2016-04-11 23:00:00	E	99.8007	N	36.3901	0	5.7	2955.9	22	4.13	A
Crane No.2	2016-04-12	E	99.8008	N	36.3898	1.7	42.5	2971.8	23.24	4.111	A
Crane No.2	2016-04-12 01:00:00	E	99.8007	N	36.3901	0	85	2986.3	22	4.087	A
Crane No.2	2016-04-12 02:00:00	E	99.8007	N	36.3901	0	174.1	2959.7	24	4.072	A
Crane No.2	2016-04-12 03:00:00	E	99.8007	N	36.3902	0	111	2948.9	20.24	4.068	A
Crane No.2	2016-04-12 04:00:00	E	99.8008	N	36.3901	0	326.4	2954.6	19.24	4.048	B
Crane No.2	2016-04-12 05:00:00	E	99.8007	N	36.3901	0	116.1	2955.5	20	4.028	A
Crane No.2	2016-04-12 06:00:00	E	99.8007	N	36.3901	0	54.2	2958	20	4.02	A
Crane No.2	2016-04-12 07:00:00	E	99.8007	N	36.3901	0	220	2960.3	19	4.019	A
Crane No.2	2016-04-12 08:00:00	E	99.8003	N	36.3902	0	0	2951	20	4.017	A
Crane No.2	2016-04-12 09:00:00	E	99.7965	N	36.3888	3.1	286.8	2955.9	21.24	4.019	A
Crane No.2	2016-04-12 10:06:00	Unknow	1000	Unknow	1000	0	0	0	19	4.048	Invalid
Crane No.2	2016-04-12 11:04:00	E	99.6417	N	36.4383	0	98.4	2987.3	21.25	4.065	D
Crane No.2	2016-04-12 12:00:00	E	99.6417	N	36.4383	0	0	2999.3	21	4.111	B
Crane No.2	2016-04-12 13:01:00	E	99.6415	N	36.4383	0	176.2	2985.5	24.25	4.176	C
Crane No.2	2016-04-12 14:00:00	E	99.6412	N	36.438	0	177.2	2996.6	24	4.23	A
Crane No.2	2016-04-12 15:00:00	E	99.6419	N	36.4376	0	125.4	3080.5	24	4.252	B
Crane No.2	2016-04-12 16:00:00	E	99.6413	N	36.4383	0	302.2	2970.5	23.25	4.265	B
Crane No.2	2016-04-12 17:01:00	E	99.6415	N	36.4383	0	0	3008	25	4.274	B
Crane No.2	2016-04-12 18:00:00	E	99.6416	N	36.4384	2.8	323.5	2986.1	19	4.277	A
Crane No.2	2016-04-12 19:00:00	E	99.6416	N	36.4382	0	189.3	2995.6	20	4.28	B
Crane No.2	2016-04-12 20:00:00	E	99.6415	N	36.4383	0	0	2984.1	18.25	4.271	A
Crane No.2	2016-04-12 21:00:00	E	99.5649	N	36.4628	0	256	3016.4	17.25	4.259	A
Crane No.2	2016-04-12 22:00:00	E	99.5649	N	36.4629	0	138	3027.4	20.25	4.25	A
Crane No.2	2016-04-12 23:00:00	E	99.5651	N	36.4628	0	0	3032.5	20.24	4.239	B
Crane No.2	2016-04-13	E	99.5649	N	36.4628	0	0	3024.5	22	4.231	A
Crane No.2	2016-04-13 01:00:00	E	99.5649	N	36.4627	0	0	2980.3	21	4.215	A
Crane No.2	2016-04-13 02:00:00	E	99.5649	N	36.4628	0	0	3027.3	21.25	4.211	A
Crane No.2	2016-04-13 03:00:00	E	99.5649	N	36.4626	4.2	183.1	3302.2	20.24	4.206	A
Crane No.2	2016-04-13 04:00:00	E	99.5649	N	36.4628	0	196	3019	20.24	4.197	A
Crane No.2	2016-04-13 05:00:00	E	99.5649	N	36.4629	0	143.8	3006.7	20	4.173	A
Crane No.2	2016-04-13 06:00:00	E	99.565	N	36.4628	0	0	3025.4	20	4.164	A
Crane No.2	2016-04-13 07:00:00	E	99.565	N	36.4628	0	0.8	3021.7	22	4.161	A
Crane No.2	2016-04-13 08:00:00	E	99.5645	N	36.4633	0	239.7	3035.9	23.25	4.157	A
Crane No.2	2016-04-13 09:01:00	E	99.5597	N	36.4689	0	248.6	3006.2	22	4.16	B
Crane No.2	2016-04-13 10:01:00	E	99.5607	N	36.4696	0	229.3	3014.7	25.25	4.174	C
Crane No.2	2016-04-13 11:00:00	E	99.56	N	36.4699	0	298.1	3008.8	21.25	4.194	A
Crane No.2	2016-04-13 12:00:00	E	99.5592	N	36.4714	0	273.6	3035.1	28	4.245	A
Crane No.2	2016-04-13 13:02:00	E	99.6568	N	36.5726	11.3	7.6	2693.3	13.25	4.271	C
Crane No.2	2016-04-13 14:00:00	E	99.6167	N	36.9323	0	40.2	3200.9	16	4.268	A
Crane No.2	2016-04-13 15:00:00	E	99.6227	N	36.949	1.7	334.9	3186.8	18	4.277	A
Crane No.2	2016-04-13 16:01:00	E	99.5826	N	37.0384	0	0	3215.5	20	4.282	B
Crane No.2	2016-04-13 17:00:00	E	99.583	N	37.0387	0	339.4	3203.5	17.24	4.285	A
Crane No.2	2016-04-13 18:00:00	E	99.6124	N	37.0861	0	127	3228.3	12	4.286	A
Crane No.2	2016-04-13 19:01:00	E	99.6161	N	37.0904	9.7	269.3	3220.6	17.24	4.283	B
Crane No.2	2016-04-13 20:01:00	E	99.5958	N	37.093	0	155.7	3201.2	16	4.27	B
Crane No.2	2016-04-13 21:00:00	E	99.5955	N	37.0931	1.8	126.2	3205.9	23.24	4.259	A
Crane No.2	2016-04-13 22:00:00	E	99.5959	N	37.093	2.2	255.5	3214.6	21.24	4.252	B
Crane No.2	2016-04-13 23:00:00	E	99.5958	N	37.093	2.6	233.6	3223.9	25.24	4.245	B
Crane No.3	2016-04-01 00:00:36	E	94.5693	N	29.4688	0	99.5	2919.3	19	4.225	A
Crane No.3	2016-04-01 01:00:20	E	94.5694	N	29.4686	2	137.4	2925.7	20	4.219	A
Crane No.3	2016-04-01 02:00:37	E	94.5694	N	29.4687	0	24.4	2940.8	22	4.213	A
Crane No.3	2016-04-01 03:00:18	E	94.5694	N	29.4687	0	0	2936.3	23	4.205	A
Crane No.3	2016-04-01 04:00:36	E	94.5695	N	29.4688	0	158.9	2925.8	20	4.2	A
Crane No.3	2016-04-01 05:00:30	E	94.5695	N	29.4689	0	0	2908.2	23	4.194	A
Crane No.3	2016-04-01 06:00:51	E	94.5693	N	29.4688	2.8	275.3	2980.8	22	4.189	B
Crane No.3	2016-04-01 07:00:36	E	94.5693	N	29.4688	0	219.8	2909.1	20	4.183	A
Crane No.3	2016-04-01 08:00:25	E	94.5543	N	29.471	0	248.1	2940.2	17.25	4.179	A
Crane No.3	2016-04-01 09:00:36	E	94.4521	N	29.393	63	203.2	3249.2	11	4.187	A
Crane No.3	2016-04-01 10:00:54	E	94.4212	N	29.364	3	100.6	2761	21.25	4.2	B
Crane No.3	2016-04-01 11:01:08	E	94.422	N	29.3636	0	252.2	2898.7	24	4.215	B
Crane No.3	2016-04-01 12:01:30	E	94.4287	N	29.3665	0	0	2903.5	20.25	4.249	B
Crane No.3	2016-04-01 13:00:11	E	94.4299	N	29.3678	2.5	9.1	2836.4	22	4.283	A
Crane No.3	2016-04-01 14:00:45	E	94.319	N	29.7112	69.3	299.2	3663	14.25	4.293	A
Crane No.3	2016-04-01 15:02:35	E	94.0241	N	30.0236	54.7	29.3	4400.8	14.25	4.293	C
Crane No.3	2016-04-01 16:06:03	E	93.9991	N	30.1453	0	0	184	19.25	4.294	D
Crane No.3	2016-04-01 17:06:38	Unknow	1000	Unknow	1000	0	0	0	22.25	4.284	Invalid
Crane No.3	2016-04-01 18:03:54	E	93.9976	N	30.1358	0	91.2	3450.1	20	4.263	D
Crane No.3	2016-04-01 19:00:38	E	93.9974	N	30.1349	0	275	3402.1	18	4.245	A
Crane No.3	2016-04-01 20:00:56	E	93.9992	N	30.1353	2.3	349.2	3534	16	4.236	B
Crane No.3	2016-04-01 21:00:54	E	93.9979	N	30.1336	0	292.3	2174	17.24	4.226	B
Crane No.3	2016-04-01 22:05:11	E	94.0025	N	30.1481	0	322.1	184	23	4.216	D
Crane No.3	2016-04-01 23:06:41	Unknow	1000	Unknow	1000	0	0	0	22.24	4.193	Invalid
Crane No.3	2016-04-02 00:06:41	Unknow	1000	Unknow	1000	0	0	0	23	4.162	Invalid
Crane No.3	2016-04-02 01:06:42	Unknow	1000	Unknow	1000	0	0	0	23	4.146	Invalid
Crane No.3	2016-04-02 02:06:39	Unknow	1000	Unknow	1000	0	0	0	23.25	4.13	Invalid
Crane No.3	2016-04-02 03:00:50	E	94.0009	N	30.1323	0	202.9	3490.1	20.25	4.115	B
Crane No.3	2016-04-02 04:00:36	E	94.0008	N	30.1323	2.8	273.8	3434.8	19.25	4.112	A
Crane No.3	2016-04-02 05:02:01	E	94.0007	N	30.132	2.2	228.8	3429.4	21	4.11	C
Crane No.3	2016-04-02 06:00:36	E	94.0009	N	30.1323	0	113.7	3485.6	20	4.104	A
Crane No.3	2016-04-02 07:00:19	E	94.0008	N	30.1324	4.3	137.6	3451	19	4.099	A
Crane No.3	2016-04-02 08:01:37	E	94.0219	N	30.0601	10.3	119.2	3474.5	12	4.097	C
Crane No.3	2016-04-02 09:01:29	E	94.0218	N	30.0519	0	2.8	3478.9	20.25	4.098	B
Crane No.3	2016-04-02 10:00:25	E	94.0228	N	30.0521	0	266.7	3481.7	22.25	4.118	A
Crane No.3	2016-04-02 11:03:38	E	94.0116	N	30.1161	53.9	3	4031.6	15.25	4.185	D
Crane No.3	2016-04-02 12:02:42	E	93.9528	N	30.3006	40.3	202.9	6042.1	12	4.232	C
Crane No.3	2016-04-02 13:04:57	E	94.2591	N	30.7805	52.3	13.7	5713.3	13	4.246	D
Crane No.3	2016-04-02 14:01:32	E	94.5762	N	31.1293	31.5	8	5841.5	10	4.252	C
Crane No.3	2016-04-02 15:04:58	E	94.9348	N	31.5837	52.5	44.3	5582.9	11	4.251	D
Crane No.3	2016-04-02 16:01:26	E	95.3613	N	31.9783	33.1	50.8	6227.8	10	4.256	B
Crane No.3	2016-04-02 17:02:00	E	95.9856	N	32.4049	116.9	63.3	5483	9	4.259	C
Crane No.3	2016-04-02 18:11:20	E	96.1375	N	32.5485	0	214.6	3773.7	19.25	4.257	C
Crane No.3	2016-04-02 19:00:36	E	96.1373	N	32.5486	0	236	3772.6	22.25	4.252	A
Crane No.3	2016-04-02 20:00:51	E	96.1376	N	32.549	4.3	351.7	3848.7	17.25	4.245	B
Crane No.3	2016-04-02 21:00:36	E	96.1345	N	32.5486	0	0	3754.6	18.25	4.232	A
Crane No.3	2016-04-02 22:00:31	E	96.1343	N	32.5486	0	111.6	3688.8	19	4.222	A
Crane No.3	2016-04-02 23:00:37	E	96.1345	N	32.5487	2.9	332.1	3732.3	18	4.214	A
Crane No.3	2016-04-03 00:00:19	E	96.1345	N	32.5487	0	48.3	3764	17.25	4.196	A
Crane No.3	2016-04-03 01:00:36	E	96.1345	N	32.5485	0	212.9	3767.1	20	4.192	A
Crane No.3	2016-04-03 02:00:25	E	96.1341	N	32.5485	7.9	260.1	3739.5	18	4.186	A
Crane No.3	2016-04-03 03:00:25	E	96.1346	N	32.5487	0	297.4	3777.6	17	4.181	A
Crane No.3	2016-04-03 04:00:36	E	96.1347	N	32.5486	0	329.9	3732.6	16	4.177	A
Crane No.3	2016-04-03 05:00:23	E	96.1345	N	32.5486	0	220.7	3762.3	15	4.172	A
Crane No.3	2016-04-03 06:01:39	E	96.1346	N	32.5487	0	125.4	3755.6	17	4.168	C
Crane No.3	2016-04-03 07:00:36	E	96.1347	N	32.5487	0	217.3	3745.8	16	4.161	A
Crane No.3	2016-04-03 08:00:26	E	96.1346	N	32.5487	0	95.6	3767.3	15.25	4.158	A
Crane No.3	2016-04-03 09:00:27	E	96.1346	N	32.5487	0	0	3767.2	20	4.16	A
Crane No.3	2016-04-03 10:00:30	E	96.1347	N	32.5487	0	0	3744.5	20.25	4.164	A
Crane No.3	2016-04-03 11:03:14	E	96.2942	N	32.6861	70.2	57.4	4666.9	12.25	4.235	D
Crane No.3	2016-04-03 12:06:08	E	96.7005	N	33.0244	68.7	75.3	4980.6	13.25	4.255	D
Crane No.3	2016-04-03 13:02:39	E	97.1544	N	33.3468	34.4	338.7	5385.4	11	4.264	C
Crane No.3	2016-04-03 14:04:24	E	97.7335	N	33.7466	69	47.3	6279.5	14	4.272	D
Crane No.3	2016-04-03 15:01:00	E	98.4167	N	34.2201	90.8	46	5295.2	11	4.267	B
Crane No.3	2016-04-03 16:05:32	E	98.983	N	34.6449	90.6	107.1	5582.8	13	4.256	D
Crane No.3	2016-04-03 17:01:06	E	99.226	N	35.0256	45	353.8	5789.3	15.25	4.26	B
Crane No.3	2016-04-03 18:02:37	E	99.5597	N	35.411	64.4	26.2	5605.9	11	4.272	C
Crane No.3	2016-04-03 19:00:28	E	100.102	N	35.7036	56.3	36.3	5179.1	13.24	4.272	A
Crane No.3	2016-04-03 20:02:39	E	100.274	N	36.1183	33.1	289.5	194.2	18	4.255	C
Crane No.3	2016-04-03 21:02:43	E	100.153	N	36.1879	0	311.8	2340.8	20.25	4.232	C
Crane No.3	2016-04-03 22:01:50	E	100.152	N	36.1868	6.9	313.8	2872.6	21	4.212	C
Crane No.3	2016-04-03 23:00:47	E	100.142	N	36.1742	3.3	279.2	195.9	18.25	4.2	B
Crane No.3	2016-04-04 00:00:45	E	100.153	N	36.1865	0	0	2869.6	19.25	4.18	A
Crane No.3	2016-04-04 01:00:36	E	100.153	N	36.1865	0	0	2865.8	19.25	4.175	A
Crane No.3	2016-04-04 02:00:16	E	100.153	N	36.1865	0	101.3	2861.9	18	4.17	A
Crane No.3	2016-04-04 03:02:35	E	100.152	N	36.1866	0	0	2938.6	18.25	4.166	C
Crane No.3	2016-04-04 04:00:29	E	100.153	N	36.1868	5.8	347.1	2815.6	18.25	4.153	A
Crane No.3	2016-04-04 05:01:02	E	100.153	N	36.1865	0	349.7	2854.7	18.25	4.149	B
Crane No.3	2016-04-04 06:00:23	E	100.152	N	36.1866	0	342.1	2796.5	18.25	4.144	A
Crane No.3	2016-04-04 07:00:36	E	100.152	N	36.1865	0	323.5	2843.9	16.25	4.14	A
Crane No.3	2016-04-04 08:00:36	E	100.152	N	36.1865	0	233.8	2854.7	19	4.137	A
Crane No.3	2016-04-04 09:00:19	E	100.152	N	36.1864	0	186.5	2838.4	20	4.14	A
Crane No.3	2016-04-04 10:01:06	E	100.156	N	36.1906	0	0	2854.7	21.25	4.154	B
Crane No.3	2016-04-04 11:00:18	E	100.176	N	36.4289	66.6	279.5	3727.5	14	4.216	A
Crane No.3	2016-04-04 12:00:36	E	100.209	N	36.6085	0	154.8	3223.4	18.25	4.24	A
Crane No.3	2016-04-04 13:00:17	E	100.162	N	36.6322	3.1	353.5	3193.6	22	4.274	A
Crane No.3	2016-04-04 14:00:28	E	100.164	N	36.6324	0	326.7	3217.6	23	4.292	A
Crane No.3	2016-04-04 15:00:54	E	100.164	N	36.6326	0	164	3218.8	21	4.302	B
Crane No.3	2016-04-04 16:00:36	E	100.164	N	36.6326	0	269.4	3219.1	22.25	4.302	A
Crane No.3	2016-04-04 17:00:19	E	100.147	N	36.6315	0	56	3195	18	4.304	A
Crane No.3	2016-04-04 18:00:36	E	100.147	N	36.6311	0	0	3192.8	22	4.306	A
Crane No.3	2016-04-04 19:00:25	E	100.147	N	36.631	0	314.8	3196.1	18	4.305	A
Crane No.3	2016-04-04 20:01:06	E	100.147	N	36.6312	0	251.2	3192	14	4.296	B
Crane No.3	2016-04-04 21:00:20	E	100.157	N	36.6328	0	175.5	3187.8	15	4.278	A
Crane No.3	2016-04-04 22:00:43	E	100.157	N	36.6328	0	180.3	3178.6	20.25	4.267	A
Crane No.3	2016-04-04 23:00:36	E	100.157	N	36.6329	0	206.4	3205.7	18.25	4.254	A
Crane No.4	2016-03-12 00:00:57	E	94.2779	N	29.2557	0	328.8	2924.6	15.25	4.012	B
Crane No.4	2016-03-12 03:00:35	E	94.2779	N	29.2556	0	0	2948.3	11.25	3.992	A
Crane No.4	2016-03-12 06:00:50	E	94.2779	N	29.2558	0	303.6	2921.2	18.25	3.985	B
Crane No.4	2016-03-12 09:01:09	E	94.2783	N	29.2556	0	250.8	2917.2	14	3.977	B
Crane No.4	2016-03-12 12:01:10	E	94.2876	N	29.2701	0	215.9	2919.8	22.25	4.051	B
Crane No.4	2016-03-12 15:01:09	E	93.8187	N	29.8231	65.6	339.2	3339.2	11.25	4.229	B
Crane No.4	2016-03-12 18:00:51	E	94.0169	N	30.0898	0	80.1	3474.7	13.25	4.203	B
Crane No.4	2016-03-12 21:00:51	E	94.0013	N	30.1329	0	63.3	3474.3	10	4.151	B
Crane No.4	2016-03-12 22:00:43	E	94.0013	N	30.1328	0	0	3463.9	20.25	4.139	A
Crane No.4	2016-03-12 23:00:35	E	94.0014	N	30.1328	0	304.8	3506.6	24.25	4.126	A
Crane No.4	2016-03-13 00:00:36	E	94.0013	N	30.1329	0	335.3	3472.7	22	4.116	A
Crane No.4	2016-03-13 01:01:05	E	94.0013	N	30.1329	0	1.8	3454.1	16	4.104	B
Crane No.4	2016-03-13 02:00:45	E	94.0014	N	30.1328	0	338.6	3496.7	12.25	4.093	A
Crane No.4	2016-03-13 03:00:51	E	94.0014	N	30.1328	0	267.2	3484.3	11.25	4.079	B
Crane No.4	2016-03-13 04:00:39	E	94.0015	N	30.1328	0	270.9	3498.5	11.25	4.073	A
Crane No.4	2016-03-13 05:00:36	E	94.0016	N	30.1328	0	80	3484.4	21.25	4.071	A
Crane No.4	2016-03-13 06:00:48	E	94.0016	N	30.1327	0	57	3480	16	4.062	B
Crane No.4	2016-03-13 07:01:21	E	94.0016	N	30.1327	0	320.4	3478.3	22	4.057	B
Crane No.4	2016-03-13 08:00:51	E	94.0017	N	30.1328	0	123.6	3489.9	14	4.049	B
Crane No.4	2016-03-13 09:00:51	E	94.002	N	30.1334	0	149.8	3488.2	13	4.046	B
Crane No.4	2016-03-13 10:01:45	E	94.0017	N	30.1338	0	108.5	3505.8	15	4.052	C
Crane No.4	2016-03-13 11:00:51	E	94.0023	N	30.1339	0	23.1	3475.5	23.25	4.085	B
Crane No.4	2016-03-13 12:00:41	E	94.0014	N	30.1335	0	154.8	3484	24.25	4.158	A
Crane No.4	2016-03-13 13:00:41	E	94.0013	N	30.1333	0	308	3480	20.25	4.226	A
Crane No.4	2016-03-13 14:00:26	E	94.0018	N	30.1338	0	26.2	3588	22.25	4.247	A
Crane No.4	2016-03-13 15:01:38	E	94.0015	N	30.1339	0	0	3461.1	19	4.257	C
Crane No.4	2016-03-13 16:01:15	E	94.0012	N	30.134	0	167.4	3481.3	13	4.251	B
Crane No.4	2016-03-13 17:01:11	E	94.0011	N	30.134	0	241.1	3508.5	11.25	4.252	B
Crane No.4	2016-03-13 18:00:38	E	94.0015	N	30.134	0	33.5	3507	11	4.253	A
Crane No.4	2016-03-13 19:00:31	E	94.0019	N	30.1338	0	73.9	3457.4	10.25	4.228	A
Crane No.4	2016-03-13 20:00:51	E	94.0016	N	30.133	0	227.1	3505.8	10.25	4.201	B
Crane No.4	2016-03-13 21:11:42	E	94.0006	N	30.1367	0	132.9	3494.2	15	4.176	C
Crane No.4	2016-03-13 22:00:29	E	94.0008	N	30.1331	0	0	3487.7	13.25	4.163	A
Crane No.4	2016-03-13 23:00:35	E	94.0006	N	30.1331	0	281.2	3453.4	10.25	4.15	A
Crane No.4	2016-03-14 00:00:35	E	94.0009	N	30.133	0	323.5	3480.5	10	4.141	A
Crane No.4	2016-03-14 01:00:51	E	94.0009	N	30.1331	0	233.2	3459.5	15.24	4.132	B
Crane No.4	2016-03-14 02:01:00	E	94.0008	N	30.1332	2.7	115.2	3429.7	23	4.129	B
Crane No.4	2016-03-14 03:00:51	E	94.001	N	30.133	0	37.2	3515.7	24	4.114	B
Crane No.4	2016-03-14 04:00:34	E	94.0009	N	30.1329	0	270.6	3497	21.25	4.107	A
Crane No.4	2016-03-14 05:00:35	E	94.001	N	30.133	0	277.3	3474.5	24	4.101	A
Crane No.4	2016-03-14 06:01:09	E	94.0009	N	30.1329	0	275.1	3481.2	20	4.094	B
Crane No.4	2016-03-14 07:01:21	E	94.001	N	30.1329	0	120.4	3468.6	17	4.085	B
Crane No.4	2016-03-14 08:00:51	E	94.0009	N	30.1329	2.3	169	3498.7	17	4.076	B
Crane No.4	2016-03-14 09:00:51	E	94.028	N	30.0527	0	337.6	3478.6	14.25	4.066	B
Crane No.4	2016-03-14 10:01:21	E	94.0276	N	30.0524	0	258.7	3476	10	4.065	B
Crane No.4	2016-03-14 11:00:35	E	94.028	N	30.0529	0	289.2	3462.1	14	4.089	A
Crane No.4	2016-03-14 12:00:38	E	94.0277	N	30.0529	0	246.1	3449.6	20	4.166	A
Crane No.4	2016-03-14 13:00:35	E	94.0018	N	30.1332	1.5	49.4	3461	14.25	4.225	A
Crane No.4	2016-03-14 14:00:33	E	93.9954	N	30.1759	0	92.5	3504	14	4.247	A
Crane No.4	2016-03-14 15:00:41	E	93.9955	N	30.1764	0	223.2	3453.4	19	4.245	A
Crane No.4	2016-03-14 16:00:39	E	93.9953	N	30.1763	0	124.5	3461.4	17	4.251	A
Crane No.4	2016-03-14 17:00:51	E	93.9953	N	30.1762	0	259.7	3524.7	18.25	4.255	B
Crane No.4	2016-03-14 18:00:35	E	93.9955	N	30.176	0	144.3	3478	15.25	4.245	A
Crane No.4	2016-03-14 19:00:41	E	94.0028	N	30.129	0	347.6	3480.4	14	4.216	A
Crane No.4	2016-03-14 20:00:35	E	94.0005	N	30.1339	0	269.6	3493.1	15.25	4.193	A
Crane No.4	2016-03-14 21:00:51	E	94.014	N	30.1048	0	225	3480.6	14	4.177	B
Crane No.4	2016-03-14 22:00:59	E	94.0135	N	30.1051	0	31.9	2954.7	12	4.16	B
Crane No.4	2016-03-14 23:00:59	E	94.0138	N	30.1046	0	32.8	3455.8	13	4.148	B
Crane No.4	2016-03-15 00:00:36	E	94.0138	N	30.1047	1.5	333.7	3463.4	14	4.139	A
Crane No.4	2016-03-15 01:00:35	E	94.0138	N	30.1046	0	276.3	3472.5	13	4.129	A
Crane No.4	2016-03-15 02:00:29	E	94.0138	N	30.1047	2.2	358.3	3456.9	15	4.12	A
Crane No.4	2016-03-15 03:02:22	E	94.0136	N	30.1044	0	16.1	3345.7	16.25	4.105	C
Crane No.4	2016-03-15 04:00:51	E	94.0138	N	30.1046	0	143.6	3481.4	19.25	4.099	B
Crane No.4	2016-03-15 05:00:36	E	94.0138	N	30.1046	0	326.8	3477.8	20	4.095	A
Crane No.4	2016-03-15 06:00:35	E	94.0138	N	30.1046	0	265.2	3470	20.25	4.09	A
Crane No.4	2016-03-15 07:00:30	E	94.0138	N	30.1046	0	286.4	3472.6	25.25	4.085	A
Crane No.4	2016-03-15 08:01:13	E	94.0119	N	30.0947	0	313.7	3474.7	14.25	4.074	B
Crane No.4	2016-03-15 09:00:40	E	94.0257	N	30.0542	0	215.7	3472.3	12	4.072	A
Crane No.4	2016-03-15 10:00:36	E	94.0273	N	30.0545	0	192.4	3461.9	15.25	4.077	A
Crane No.4	2016-03-15 11:00:43	E	94.0269	N	30.0524	0	117.8	3461.7	17	4.13	A
Crane No.4	2016-03-15 12:00:36	E	94.0258	N	30.0516	0	206.7	3464.6	17	4.182	A
Crane No.4	2016-03-15 13:00:33	E	94.0258	N	30.0538	0	324.8	3477.5	22.25	4.224	A
Crane No.4	2016-03-15 14:00:42	E	94.0233	N	30.0541	0	111.9	3470.1	20	4.253	A
Crane No.4	2016-03-15 15:00:35	E	94.0225	N	30.0553	0	52.3	3465.9	22	4.269	A
Crane No.4	2016-03-15 16:00:33	E	94.0218	N	30.0563	0	289	3449	21.25	4.272	A
Crane No.4	2016-03-15 17:00:34	E	94.0215	N	30.0551	0	238.5	3474	18	4.266	A
Crane No.4	2016-03-15 18:00:38	E	94.0221	N	30.0535	0	190.6	3466.9	12	4.246	A
Crane No.4	2016-03-15 19:00:33	E	94.0225	N	30.0537	0	57.1	3462.3	12	4.222	A
Crane No.4	2016-03-15 20:00:33	E	94.0004	N	30.1342	0	40.7	3485.5	11	4.198	A
Crane No.4	2016-03-15 21:00:40	E	94.0006	N	30.1358	0	283.4	3501.1	12.25	4.182	A
Crane No.4	2016-03-15 22:00:34	E	94.0004	N	30.1358	0	155.4	3464.6	19	4.175	A
Crane No.4	2016-03-15 23:00:51	E	94.0004	N	30.1358	0	338.1	3458.9	15	4.166	B
Crane No.4	2016-03-16 00:00:35	E	94.0007	N	30.136	0	58.2	3522.7	23.25	4.157	A
Crane No.4	2016-03-16 01:00:30	E	94.0006	N	30.1358	0	0	3483	24.25	4.15	A
Crane No.4	2016-03-16 02:00:35	E	94.0006	N	30.1358	0	253.6	3497.3	25	4.142	A
Crane No.4	2016-03-16 03:00:51	E	94.0006	N	30.1358	0	194.8	3494.3	18.25	4.126	B
Crane No.4	2016-03-16 04:00:52	E	94.0007	N	30.1359	0	151.4	3483.9	19.24	4.118	B
Crane No.4	2016-03-16 05:00:51	E	94.0006	N	30.1359	0	225.6	3468.6	14.25	4.11	B
Crane No.4	2016-03-16 06:00:34	E	93.9999	N	30.1365	0	266.1	3495.7	14.25	4.102	A
Crane No.4	2016-03-16 07:00:34	E	94.0007	N	30.1357	3.6	129.9	3500	13	4.094	A
Crane No.4	2016-03-16 08:00:51	E	94.0002	N	30.1341	0	155.1	3501.4	12.25	4.088	B
Crane No.4	2016-03-16 09:01:09	E	94.0281	N	30.0525	0	112.8	3473.2	12.25	4.087	B
Crane No.4	2016-03-16 10:00:51	E	94.0283	N	30.0524	0	296.3	3616.4	14.25	4.098	B
Crane No.4	2016-03-16 11:00:51	E	94.0277	N	30.0527	0	105.4	3449.1	23	4.097	B
Crane No.4	2016-03-16 12:00:47	E	94.0275	N	30.0524	0	291.2	3462.4	20.25	4.127	B
Crane No.4	2016-03-16 13:00:30	E	94.0273	N	30.0524	0	120.3	3471.8	21.25	4.183	A
Crane No.4	2016-03-16 14:01:09	E	94.0263	N	30.0511	0	342.5	3475.4	20.25	4.25	B
Crane No.4	2016-03-16 15:00:55	E	94.0279	N	30.0527	0	315.6	3480.8	10.25	4.246	B
Crane No.4	2016-03-16 16:00:48	E	94.0276	N	30.0548	0	136.7	3455.3	20.25	4.268	B
Crane No.4	2016-03-16 17:00:51	E	94.0274	N	30.0539	0	309.6	3481.8	13.25	4.268	B
Crane No.4	2016-03-16 18:00:51	E	94.0275	N	30.0535	0	319.6	3434.8	13.25	4.238	B
Crane No.4	2016-03-16 19:00:51	E	94.0276	N	30.053	1.8	252.9	3445	15.25	4.215	B
Crane No.4	2016-03-16 20:00:51	E	94.0004	N	30.1344	0	292	3479	11.25	4.196	B
Crane No.4	2016-03-16 21:00:51	E	94.0007	N	30.1332	0	290.2	3450.6	11	4.177	B
Crane No.4	2016-03-16 22:00:35	E	94.0003	N	30.1315	0	283.6	3459.6	12	4.165	A
Crane No.4	2016-03-16 23:01:34	E	94	N	30.1319	0	232.5	3497	18	4.159	C
Crane No.4	2016-03-17 00:01:48	E	94	N	30.1319	0	304.6	3504.3	19	4.148	C
Crane No.4	2016-03-17 01:00:51	E	93.9999	N	30.1319	0	0	3485.9	18.25	4.137	B
Crane No.4	2016-03-17 02:00:37	E	94	N	30.1318	0	176.9	3497	17.25	4.128	A
Crane No.4	2016-03-17 03:00:35	E	94.0001	N	30.1319	0	140.4	3481.8	18	4.113	A
Crane No.4	2016-03-17 04:00:51	E	94	N	30.1319	0	39.4	3492.2	17.25	4.108	B
Crane No.4	2016-03-17 05:01:09	E	94	N	30.1319	0	0	3469.2	17	4.1	B
Crane No.4	2016-03-17 06:00:34	E	94	N	30.1319	0	262.2	3501.1	15	4.092	A
Crane No.4	2016-03-17 07:00:51	E	93.9999	N	30.1318	0	163.6	3481.1	14	4.085	B
Crane No.4	2016-03-17 08:01:15	E	94	N	30.1318	0	352.2	3482.7	10	4.076	B
Crane No.4	2016-03-17 09:00:39	E	93.9998	N	30.1319	1.5	216.2	3434.9	12	4.066	A
Crane No.4	2016-03-17 10:01:03	E	94.0259	N	30.0535	2.8	261.4	3521.9	14.25	4.064	B
Crane No.4	2016-03-17 11:00:30	E	94.0252	N	30.054	0	0	3442.5	20	4.123	A
Crane No.4	2016-03-17 12:00:51	E	94.0264	N	30.0547	0	78.6	3461.3	25	4.2	B
Crane No.4	2016-03-17 13:00:44	E	94.0257	N	30.0549	0	0	3477.7	21	4.244	A
Crane No.4	2016-03-17 14:00:52	E	94.0276	N	30.053	1.7	162.3	3495.9	22	4.265	B
Crane No.4	2016-03-17 15:00:35	E	94.027	N	30.0524	0	319.3	3453.4	23.25	4.277	A
Crane No.4	2016-03-17 16:01:15	E	94.0267	N	30.0522	0	226	3453.5	23	4.282	B
Crane No.4	2016-03-17 17:00:51	E	94.0272	N	30.0524	1.7	164.2	3489.2	24.25	4.279	B
Crane No.4	2016-03-17 18:00:51	E	94.028	N	30.0525	0	106.3	3457.9	20.25	4.277	B
Crane No.4	2016-03-17 19:00:51	E	94.0263	N	30.0539	0	6.8	3462	12.24	4.253	B
Crane No.4	2016-03-17 20:00:35	E	94.0264	N	30.0543	0	317.1	3476.2	10	4.225	A
Crane No.4	2016-03-17 21:00:52	E	94.0006	N	30.1334	0	95	3463.8	12	4.208	B
Crane No.4	2016-03-17 22:00:36	E	94.0005	N	30.1334	0	3	3434.6	18	4.196	A
Crane No.4	2016-03-17 23:00:59	E	94.0006	N	30.1335	0	0	3463.3	18.24	4.184	B
Crane No.4	2016-03-18 00:00:54	E	94.0007	N	30.1337	0	341.3	3603.1	18	4.171	B
Crane No.4	2016-03-18 01:00:41	E	94.0007	N	30.1334	0	345.3	3509.8	18	4.161	A
Crane No.4	2016-03-18 02:00:51	E	94.0007	N	30.133	0	10.4	3470.2	12	4.148	B
Crane No.4	2016-03-18 03:00:33	E	94.0007	N	30.133	0	0	3495.7	15	4.128	A
Crane No.4	2016-03-18 04:00:35	E	94.0008	N	30.133	0	0	3488.9	16	4.123	A
Crane No.4	2016-03-18 05:00:29	E	94.0008	N	30.133	0	121.8	3478.7	17.25	4.117	A
Crane No.4	2016-03-18 06:00:34	E	94.0007	N	30.1329	0	178.8	3474.6	16.25	4.109	A
Crane No.4	2016-03-18 07:00:51	E	94.0008	N	30.1329	0	158.8	3458.1	16.25	4.102	B
Crane No.4	2016-03-18 08:00:36	E	94.0007	N	30.1329	0	247.8	3475.1	15.25	4.095	A
Crane No.4	2016-03-18 09:02:30	E	94.0139	N	30.0936	59.6	178.4	3631.7	11.25	4.086	C
Crane No.4	2016-03-18 10:01:00	E	94.0186	N	30.0497	0	106.1	3456.5	15.25	4.09	B
Crane No.4	2016-03-18 11:00:51	E	94.0226	N	30.0539	0	243.2	3469.4	20.25	4.133	B
Crane No.4	2016-03-18 12:00:47	E	94.0268	N	30.0575	2.4	328.2	3469.7	23.25	4.169	B
Crane No.4	2016-03-18 13:02:32	E	94.0108	N	30.1065	34.7	3.5	4112.3	10.25	4.244	C
Crane No.4	2016-03-18 14:00:59	E	94.0267	N	30.0542	0	0	4082.3	21.25	4.25	B
Crane No.4	2016-03-18 15:00:52	E	94.0275	N	30.0538	0	0	3456.4	24.25	4.272	B
Crane No.4	2016-03-18 16:01:17	E	94.0232	N	30.0616	1.9	291.8	1001.7	21	4.28	B
Crane No.4	2016-03-18 17:02:31	E	94.0271	N	30.055	0	312.4	3487.6	24.25	4.278	C
Crane No.4	2016-03-18 18:00:51	E	94.0267	N	30.055	2.4	290.3	3454.6	15	4.269	B
Crane No.4	2016-03-18 19:00:34	E	94.0279	N	30.0527	0	46.1	3484.2	12	4.257	A
Crane No.4	2016-03-18 20:00:41	E	94.0268	N	30.0535	0	270.8	3501.3	11	4.226	A
Crane No.4	2016-03-18 21:00:51	E	94.0172	N	30.0899	0	183.3	3479.1	13.24	4.207	B
Crane No.4	2016-03-18 22:00:38	E	94.0172	N	30.09	0	117.9	3474.7	14	4.192	A
Crane No.4	2016-03-18 23:00:45	E	94.0173	N	30.09	0	84.8	3474.9	16.24	4.181	A
Crane No.4	2016-03-19 00:00:47	E	94.0174	N	30.0899	0	91	3482.9	16.24	4.169	B
Crane No.4	2016-03-19 01:00:51	E	94.0173	N	30.09	0	0	3480	13.25	4.158	B
Crane No.4	2016-03-19 02:00:37	E	94.0173	N	30.0899	0	173.3	3505.9	14.25	4.147	A
Crane No.4	2016-03-19 03:00:35	E	94.0173	N	30.09	0	204.7	3471.4	11.25	4.128	A
Crane No.4	2016-03-19 04:00:35	E	94.0173	N	30.0898	0	275.8	3492.9	13	4.123	A
Crane No.4	2016-03-19 05:00:51	E	94.0172	N	30.0899	0	229.2	3462.1	13	4.113	B
Crane No.4	2016-03-19 06:00:51	E	94.0172	N	30.0898	0	240.2	3474.6	12	4.104	B
Crane No.4	2016-03-19 07:00:31	E	94.0162	N	30.0898	0	65.6	3494.8	12	4.096	A
Crane No.4	2016-03-19 08:00:32	E	94.027	N	30.0549	0	62	3471	13	4.085	A
Crane No.4	2016-03-19 09:00:58	E	94.0274	N	30.0525	0	187.7	3486.2	13	4.099	B
Crane No.4	2016-03-19 10:00:51	E	94.0272	N	30.0544	0	191.8	3449.9	12.25	4.112	B
Crane No.4	2016-03-19 11:06:39	Unknow	1000	Unknow	1000	0	0	0	22.25	4.145	Invalid
Crane No.4	2016-03-19 12:00:35	E	94.0269	N	30.0521	0	243.2	3471.6	23	4.181	A
Crane No.4	2016-03-19 13:00:31	E	94.0265	N	30.0514	0	52.8	3462.7	11.25	4.2	A
Crane No.4	2016-03-19 14:01:00	E	94.0281	N	30.0534	0	103	3507.7	13.25	4.231	B
Crane No.4	2016-03-19 15:00:34	E	94.0268	N	30.0536	0	258.4	3489.2	21	4.25	A
Crane No.4	2016-03-19 16:00:40	E	94.0264	N	30.054	0	323.8	3497.2	22.25	4.263	A
Crane No.4	2016-03-19 17:00:30	E	94.0246	N	30.0553	0	307	3484.8	18.25	4.268	A
Crane No.4	2016-03-19 18:00:35	E	94.0233	N	30.053	0	158	3463.4	20	4.269	A
Crane No.4	2016-03-19 19:00:33	E	94.023	N	30.0522	0	301.9	3482.9	12.25	4.25	A
Crane No.4	2016-03-19 20:01:01	E	94.0188	N	30.0562	45.7	280.8	3520.8	11.25	4.222	B
Crane No.4	2016-03-19 21:00:51	E	94.0004	N	30.1327	0	173.6	3465.5	11.25	4.201	B
Crane No.4	2016-03-19 22:00:30	E	94.0004	N	30.1327	0	188.3	3461.5	14.25	4.187	A
Crane No.4	2016-03-19 23:00:51	E	94.0005	N	30.1328	0	133.5	3478.7	18.25	4.179	B
Crane No.4	2016-03-20 00:00:59	E	94.0005	N	30.1327	0	145.3	3435	20	4.168	B
Crane No.4	2016-03-20 01:00:51	E	94.0005	N	30.1327	0	223.4	3475.8	19.24	4.158	B
Crane No.4	2016-03-20 02:00:35	E	94.0005	N	30.1327	0	61.4	3493.5	18	4.148	A
Crane No.4	2016-03-20 03:00:51	E	94.0005	N	30.1327	0	203.9	3492.3	17	4.131	B
Crane No.4	2016-03-20 04:00:54	E	94.0005	N	30.1327	0	316.3	3479.3	17	4.123	B
Crane No.4	2016-03-20 05:00:38	E	94.0008	N	30.133	0	9	3478.1	15.25	4.115	A
Crane No.4	2016-03-20 06:01:00	E	94.0008	N	30.1329	0	177.2	3482.5	17.25	4.108	B
Crane No.4	2016-03-20 07:00:54	E	94.0009	N	30.133	0	70.3	3510.6	18	4.099	B
Crane No.4	2016-03-20 08:00:36	E	94.0135	N	30.1098	59.8	178.7	3499	10	4.09	A
Crane No.4	2016-03-20 09:00:35	E	94.0285	N	30.0521	0	101.5	3467.8	12.25	4.092	A
Crane No.4	2016-03-20 10:00:41	E	94.0265	N	30.0521	0	104.7	3478.5	14	4.103	A
Crane No.4	2016-03-20 11:00:29	E	94.0252	N	30.0521	2	99.5	3475.2	18.25	4.143	A
Crane No.4	2016-03-20 12:00:51	E	94.0252	N	30.0534	0	197.5	3467.6	23	4.194	B
Crane No.4	2016-03-20 13:00:35	E	94.0267	N	30.0539	1.9	149	3479.3	20.25	4.237	A
Crane No.4	2016-03-20 14:00:52	E	94.0274	N	30.0535	0	97	3483.5	23	4.257	B
Crane No.4	2016-03-20 15:00:45	E	94.0256	N	30.0541	0	196.4	3479.1	22	4.268	A
Crane No.4	2016-03-20 16:00:43	E	94.0264	N	30.0525	0	194.5	3489.1	20.25	4.274	A
Crane No.4	2016-03-20 17:00:28	E	94.027	N	30.0538	0	290.2	3490.1	24	4.275	A
Crane No.4	2016-03-20 18:01:31	E	94.0269	N	30.0536	0	182.6	3465.6	15	4.267	C
Crane No.4	2016-03-20 19:00:51	E	94.0257	N	30.0544	0	127.3	3450.7	15	4.244	B
Crane No.4	2016-03-20 20:06:42	Unknow	1000	Unknow	1000	0	0	0	12	4.217	Invalid
Crane No.4	2016-03-20 21:00:51	E	94.0008	N	30.1331	0	220.7	3277.1	13.25	4.178	B
Crane No.4	2016-03-20 22:00:51	E	94.0007	N	30.1331	0	32.8	3475.8	20	4.172	B
Crane No.4	2016-03-20 23:00:40	E	94.0007	N	30.1331	0	97.5	3469	18.25	4.163	A
Crane No.4	2016-03-21 00:00:51	E	94.0006	N	30.1331	0	110.4	3469.8	21	4.154	B
Crane No.4	2016-03-21 01:00:27	E	94.0006	N	30.1331	0	277	3475.9	16.25	4.143	A
Crane No.4	2016-03-21 02:00:51	E	94.0007	N	30.1331	0	0	3516.1	19.25	4.135	B
Crane No.4	2016-03-21 03:00:51	E	94.0006	N	30.1329	0	14.7	3465.7	19.25	4.119	B
Crane No.4	2016-03-21 04:00:51	E	94.0008	N	30.1331	0	97.4	3476.1	18	4.111	B
Crane No.4	2016-03-21 05:00:40	E	94.0011	N	30.1335	0	28.2	3641.8	20	4.104	A
Crane No.4	2016-03-21 06:00:29	E	94.0008	N	30.1329	0	152.4	3489.2	18.25	4.097	A
Crane No.4	2016-03-21 07:01:09	E	94.0007	N	30.1329	0	23.8	3497.3	15	4.088	B
Crane No.4	2016-03-21 08:00:37	E	94.021	N	30.0649	48.8	174	3581.5	12.25	4.076	A
Crane No.4	2016-03-21 09:00:51	E	94.0274	N	30.0545	0	67.3	3476.4	11	4.083	B
Crane No.4	2016-03-21 10:00:40	E	94.0273	N	30.0525	0	117.8	3482	11.25	4.084	A
Crane No.4	2016-03-21 11:00:38	E	94.0272	N	30.0536	0	1.4	3467.7	16	4.12	A
Crane No.4	2016-03-21 12:00:41	E	94.0264	N	30.0542	0	336	3465.3	17.25	4.152	A
Crane No.4	2016-03-21 13:00:51	E	94.0273	N	30.0536	0	0	3504.9	16	4.189	B
Crane No.4	2016-03-21 14:01:15	E	94.028	N	30.0532	0	133.9	3491.8	11	4.206	B
Crane No.4	2016-03-21 15:00:35	E	94.0274	N	30.0558	0	353.1	3480.7	16	4.236	A
Crane No.4	2016-03-21 16:00:30	E	94.027	N	30.0534	1.7	135.2	3494.2	17.25	4.249	A
Crane No.4	2016-03-21 17:00:59	E	94.0281	N	30.0525	0	320.4	3489.7	10.25	4.25	B
Crane No.4	2016-03-21 18:00:51	E	94.0281	N	30.0522	0	302.6	3490.3	11	4.251	B
Crane No.4	2016-03-21 19:00:28	E	94.0264	N	30.0541	0	354	3472.4	10	4.226	A
Crane No.4	2016-03-21 20:01:01	E	94.0254	N	30.0545	7.6	10.6	3486.4	13	4.202	B
Crane No.4	2016-03-21 21:11:27	E	94.0007	N	30.1332	0	256.3	3425.1	13	4.178	C
Crane No.4	2016-03-21 22:00:51	E	94.0006	N	30.1332	0	0	3454.2	19.25	4.172	B
Crane No.4	2016-03-21 23:00:51	E	94.0008	N	30.1333	0	0	3457.6	17.25	4.16	B
Crane No.4	2016-03-22 00:00:34	E	94.0008	N	30.1333	0	0	3495.3	14.25	4.145	A
Crane No.4	2016-03-22 01:00:51	E	94.0008	N	30.1332	0	140.5	3476.1	14.25	4.135	B
Crane No.4	2016-03-22 02:00:35	E	94.0008	N	30.1331	0	136.4	3516.5	11.24	4.123	A
Crane No.4	2016-03-22 03:01:46	E	94.0007	N	30.1332	0	196.7	3501.9	16	4.108	C
Crane No.4	2016-03-22 04:00:35	E	94.0007	N	30.1332	0	0	3471.6	15.25	4.1	A
Crane No.4	2016-03-22 05:00:32	E	94.0008	N	30.1331	0	156.3	3497.5	15.25	4.093	A
Crane No.4	2016-03-22 06:00:51	E	94.0007	N	30.1332	0	346.8	3487.8	13	4.085	B
Crane No.4	2016-03-22 07:00:30	E	94.0008	N	30.133	0	203.3	3475.4	15.25	4.079	A
Crane No.4	2016-03-22 08:01:08	E	94.0251	N	30.0572	56	158.3	3469.6	12	4.067	B
Crane No.4	2016-03-22 09:01:16	E	94.0283	N	30.0513	0	141.7	3283.2	11.25	4.07	B
Crane No.4	2016-03-22 10:00:51	E	94.0271	N	30.0537	0	302.1	3466.1	15	4.087	B
Crane No.4	2016-03-22 11:00:51	E	94.0273	N	30.0526	0	293.2	3468.4	17	4.125	B
Crane No.4	2016-03-22 12:00:43	E	94.0266	N	30.0528	0	252.9	3458.4	20.25	4.163	A
Crane No.4	2016-03-22 13:00:43	E	94.0272	N	30.0537	0	270	3483.6	19.25	4.216	A
Crane No.4	2016-03-22 14:01:03	E	94.0279	N	30.0533	0	140.6	3460.8	23.25	4.241	B
Crane No.4	2016-03-22 15:00:31	E	94.0273	N	30.0527	0	286.2	3461.8	19.25	4.255	A
Crane No.4	2016-03-22 16:01:01	E	94.0259	N	30.0533	0	0	3469.4	15	4.234	B
Crane No.4	2016-03-22 17:01:03	E	94.0264	N	30.0543	0	312.7	3472.2	12.25	4.212	B
Crane No.4	2016-03-22 18:00:51	E	94.0273	N	30.0536	0	234	3459.4	14.24	4.239	B
Crane No.4	2016-03-22 19:00:51	E	94.0282	N	30.054	0	300.6	3458.9	12	4.22	B
Crane No.4	2016-03-22 20:00:51	E	94.0273	N	30.0546	0	325.5	3475.8	12	4.193	B
Crane No.4	2016-03-22 21:00:51	E	94.0006	N	30.1331	0	72.5	3463.8	12.24	4.176	B
Crane No.4	2016-03-22 22:00:33	E	94.0005	N	30.1331	0	50.4	3459.7	16.24	4.163	A
Crane No.4	2016-03-22 23:00:53	E	94.0005	N	30.1332	0	329	3468.3	19	4.155	B
Crane No.4	2016-03-23 00:00:51	E	94.0007	N	30.1331	0	181.8	3459.4	15.25	4.142	B
Crane No.4	2016-03-23 01:00:27	E	94.0007	N	30.1331	0	152.6	3494.4	16	4.133	A
Crane No.4	2016-03-23 02:00:51	E	94.0006	N	30.1331	0	211.3	3501.2	15.25	4.124	B
Crane No.4	2016-03-23 03:00:51	E	94.0007	N	30.1331	0	347.6	3487	15.25	4.106	B
Crane No.4	2016-03-23 04:00:35	E	94.0006	N	30.1332	0	295.3	3462.6	16.25	4.101	A
Crane No.4	2016-03-23 05:00:40	E	94.0007	N	30.133	0	57.3	3495.7	18	4.094	A
Crane No.4	2016-03-23 06:00:51	E	94.0007	N	30.133	0	172.8	3481.4	19	4.087	B
Crane No.4	2016-03-23 07:00:49	E	94.0007	N	30.1331	0	24.1	3478	18	4.08	B
Crane No.4	2016-03-23 08:00:32	E	94.0012	N	30.1337	0	15.9	3529	15	4.071	A
Crane No.4	2016-03-23 09:01:40	E	94.0005	N	30.1337	0	313.9	3495	16.25	4.072	C
Crane No.4	2016-03-23 10:00:39	E	94.0002	N	30.1338	0	78.5	3476.6	19	4.074	A
Crane No.4	2016-03-23 11:00:51	E	94.0001	N	30.1336	0	3.5	3487.5	23	4.089	B
Crane No.4	2016-03-23 12:00:46	E	93.9956	N	30.1558	30.7	195.5	3564.4	10	4.154	B
Crane No.4	2016-03-23 13:01:21	E	93.9683	N	30.2042	0	67.8	3510.5	18	4.195	B
Crane No.4	2016-03-23 14:00:35	E	93.9686	N	30.2041	0	112	3515.5	21	4.204	A
Crane No.4	2016-03-23 15:00:35	E	93.9698	N	30.2046	1.8	263	3500.4	20.25	4.235	A
Crane No.4	2016-03-23 16:00:33	E	93.9689	N	30.2042	0	127.1	3514.7	20.25	4.256	A
Crane No.4	2016-03-23 17:00:59	E	93.9701	N	30.204	1.5	102.3	3516.6	16	4.26	B
Crane No.4	2016-03-23 18:00:35	E	93.9703	N	30.2037	0	340.5	3507.9	16.25	4.258	A
Crane No.4	2016-03-23 19:00:37	E	93.971	N	30.2039	1.5	308.6	3515.7	16	4.238	A
Crane No.4	2016-03-23 20:01:05	E	93.9689	N	30.2052	0	39.8	3519.9	15.25	4.207	B
Crane No.4	2016-03-23 21:00:29	E	94.0011	N	30.1329	0	351.2	3497.1	13.24	4.187	A
Crane No.4	2016-03-23 22:00:51	E	94.001	N	30.1329	0	168.9	3493.6	16.24	4.177	B
Crane No.4	2016-03-23 23:01:17	E	94.0011	N	30.133	0	172.2	3469.2	19.25	4.166	B
Crane No.4	2016-03-24 00:00:51	E	94.0011	N	30.1329	0	0	3469.7	14.25	4.152	B
Crane No.4	2016-03-24 01:00:52	E	94.0011	N	30.1329	0	167.5	3482.5	18	4.142	B
Crane No.4	2016-03-24 02:00:35	E	94.0011	N	30.133	0	0	3504	18.25	4.133	A
Crane No.4	2016-03-24 03:00:51	E	94.0011	N	30.1329	0	174.9	3484.7	13.25	4.113	B
Crane No.4	2016-03-24 04:00:35	E	94.0011	N	30.1329	0	290.5	3486.8	15	4.106	A
Crane No.4	2016-03-24 05:00:33	E	94.0011	N	30.1329	0	189.2	3473.7	14	4.098	A
Crane No.4	2016-03-24 06:00:51	E	94.001	N	30.1329	0	183.7	3490	14.25	4.09	B
Crane No.4	2016-03-24 07:00:51	E	94.0011	N	30.1329	0	176.7	3480.6	13.25	4.081	B
Crane No.4	2016-03-24 08:00:36	E	94.0011	N	30.133	0	48.8	3491.3	15	4.073	A
Crane No.4	2016-03-24 09:00:58	E	94.001	N	30.1327	0	184.4	3510.1	15	4.066	B
Crane No.4	2016-03-24 10:00:34	E	94.0011	N	30.1329	0	282.9	3484	14	4.064	A
Crane No.4	2016-03-24 11:00:51	E	93.9708	N	30.2038	0	28.1	3518.7	10	4.129	B
Crane No.4	2016-03-24 12:00:52	E	93.9859	N	30.2181	36.3	250.7	5619.9	11.25	4.221	B
Crane No.4	2016-03-24 13:06:42	Unknow	1000	Unknow	1000	0	0	0	2.25	4.229	Invalid
Crane No.4	2016-03-24 14:06:38	Unknow	1000	Unknow	1000	0	0	0	4	4.226	Invalid
Crane No.4	2016-03-24 15:06:42	Unknow	1000	Unknow	1000	0	0	0	8.25	4.226	Invalid
Crane No.4	2016-03-24 16:06:35	Unknow	1000	Unknow	1000	0	0	0	2	4.231	Invalid
Crane No.4	2016-03-24 17:03:31	E	96.4778	N	32.273	61.7	350.6	185.8	7	4.215	D
Crane No.4	2016-03-24 18:01:26	E	96.4662	N	32.2791	0	109.4	3657	19.25	4.181	B
Crane No.4	2016-03-24 19:00:34	E	96.4659	N	32.2797	0	297.7	3665.5	12	4.165	A
Crane No.4	2016-03-24 20:00:51	E	96.4706	N	32.2737	0	249.6	3655	15	4.145	B
Crane No.4	2016-03-24 21:00:32	E	96.4707	N	32.2737	0	243.9	3639.1	14	4.135	A
Crane No.4	2016-03-24 22:00:29	E	96.4706	N	32.2737	0	0	3639.1	13.25	4.123	A
Crane No.4	2016-03-24 23:00:28	E	96.4707	N	32.2737	1.5	194.4	3645.9	14	4.113	A
Crane No.4	2016-03-25 00:00:42	E	96.4707	N	32.2737	0	182	3636.7	17	4.106	A
Crane No.4	2016-03-25 01:00:34	E	96.4707	N	32.2737	4.7	344.2	3617.7	16.24	4.098	A
Crane No.4	2016-03-25 02:00:34	E	96.4707	N	32.2736	0	136.2	3649.1	11	4.087	A
Crane No.4	2016-03-25 03:00:31	E	96.4707	N	32.2735	1.8	140.4	3646.6	15	4.071	A
Crane No.4	2016-03-25 04:00:55	E	96.4708	N	32.2734	0	153.6	3660.7	15.25	4.066	B
Crane No.4	2016-03-25 05:00:51	E	96.4707	N	32.2736	0	259.9	3637.8	15.25	4.059	B
Crane No.4	2016-03-25 06:00:25	E	96.4706	N	32.2735	0	207.1	3633.9	15.25	4.051	A
Crane No.4	2016-03-25 07:00:25	E	96.4707	N	32.2735	0	297.3	3643.2	15	4.045	A
Crane No.4	2016-03-25 08:00:37	E	96.4707	N	32.2735	0	314.7	3641.2	15.25	4.039	A
Crane No.4	2016-03-25 09:00:30	E	96.4707	N	32.2736	0	208.1	3636.9	17	4.044	A
Crane No.4	2016-03-25 10:00:51	E	96.4707	N	32.2735	0	167.2	3645.6	19.25	4.053	B
Crane No.4	2016-03-25 11:00:44	E	96.4706	N	32.2737	0	240.4	3650	25	4.067	A
Crane No.4	2016-03-25 12:11:40	E	96.6511	N	32.6155	61.3	349.3	4780.6	10.24	4.213	D
Crane No.4	2016-03-25 13:00:33	E	96.9825	N	32.9486	64.6	53.3	4791.2	11.25	4.222	A
Crane No.4	2016-03-25 14:01:13	E	97.3709	N	33.316	74.9	40.4	5016.3	11.25	4.229	B
Crane No.4	2016-03-25 15:05:02	E	97.6128	N	33.3717	77.2	280.2	5268.1	10.25	4.235	D
Crane No.4	2016-03-25 15:15:55	E	97.4965	N	33.3741	0	136.9	4431.9	11.25	4.122	C
Crane No.4	2016-03-25 15:23:20	E	97.4956	N	33.3749	0	0	4245.3	11.25	4.105	C
Crane No.4	2016-03-25 15:30:28	E	97.4954	N	33.375	0	65.5	4199.1	16	4.183	C
Crane No.4	2016-03-25 15:37:37	E	97.4955	N	33.3751	0	0	4195.5	18.25	4.189	C
Crane No.4	2016-03-25 15:44:47	E	97.4954	N	33.3751	0	0	4201.3	17.25	4.162	C
Crane No.4	2016-03-25 15:51:54	E	97.4954	N	33.3751	0	95.3	4191	18.25	4.192	C
Crane No.4	2016-03-25 16:00:41	E	97.4956	N	33.3752	0	22.1	4183.5	17.25	4.232	A
Crane No.4	2016-03-25 17:00:51	E	97.4951	N	33.375	0	317.5	4190.1	14	4.243	B
Crane No.4	2016-03-25 18:00:32	E	97.4949	N	33.3751	0	143.1	4184	13	4.244	A
Crane No.4	2016-03-25 19:00:31	E	97.495	N	33.3751	0	0	4185	11.25	4.247	A
Crane No.4	2016-03-25 20:00:36	E	97.4953	N	33.3752	0	300	4194	12	4.211	A
Crane No.4	2016-03-25 21:00:30	E	97.5153	N	33.3753	0	123	4177.5	13	4.194	A
Crane No.4	2016-03-25 22:00:29	E	97.5153	N	33.3753	0	26.6	4169.3	14.25	4.178	A
Crane No.4	2016-03-25 23:00:51	E	97.5153	N	33.3752	0	7.3	4176.6	14	4.165	B
Crane No.4	2016-03-26 00:00:42	E	97.5153	N	33.3752	0	341.7	4178.9	15.25	4.155	A
Crane No.4	2016-03-26 01:00:29	E	97.5153	N	33.3752	0	243	4184	15.24	4.141	A
Crane No.4	2016-03-26 02:00:51	E	97.5153	N	33.3752	0	244.3	4189.4	16.24	4.131	B
Crane No.4	2016-03-26 03:00:33	E	97.5153	N	33.3753	0	313.1	4178.2	14.25	4.112	A
Crane No.4	2016-03-26 04:00:28	E	97.5153	N	33.3752	0	302.7	4176.4	13	4.106	A
Crane No.4	2016-03-26 05:00:38	E	97.5153	N	33.3752	0	324.9	4184	13	4.097	A
Crane No.4	2016-03-26 06:00:29	E	97.5153	N	33.3752	0	197.9	4169.3	11.25	4.088	A
Crane No.4	2016-03-26 07:00:51	E	97.5153	N	33.3752	0	311.5	4177.4	15.25	4.078	B
Crane No.4	2016-03-26 08:00:35	E	97.5153	N	33.3753	0	213.9	4173.3	11	4.074	A
Crane No.4	2016-03-26 09:00:28	E	97.5104	N	33.3729	0	180.4	4175.7	10.25	4.095	A
Crane No.4	2016-03-26 10:00:35	E	97.4964	N	33.376	3.1	240.3	4151	22	4.122	A
Crane No.4	2016-03-26 11:01:07	E	97.5138	N	33.4179	18.5	91	5024.9	11.25	4.196	B
Crane No.4	2016-03-26 12:00:43	E	97.7745	N	33.6982	50.5	1.4	5635.9	6.25	4.23	A
Crane No.4	2016-03-26 13:04:09	E	98.0151	N	34.0359	53.9	40.1	5504.6	8.25	4.235	D
Crane No.4	2016-03-26 14:01:10	E	98.2816	N	34.3952	64.3	20.9	5174.3	9.25	4.237	B
Crane No.4	2016-03-26 15:01:27	E	98.4376	N	34.7668	54.6	17	4031.4	10	4.241	B
Crane No.4	2016-03-26 16:06:29	Unknow	1000	Unknow	1000	0	0	0	10	4.233	Invalid
Crane No.4	2016-03-26 16:33:37	E	98.2906	N	35.2399	16.8	337.9	6165.8	7.25	3.924	C
Crane No.4	2016-03-26 16:41:00	E	98.2582	N	35.2928	74	329.6	5893.4	6.25	3.923	C
Crane No.4	2016-03-26 17:02:51	E	98.1727	N	35.4455	56.1	334.1	5533.4	9	4.225	C
Crane No.4	2016-03-26 18:00:41	E	98.0049	N	35.8913	38.2	334.2	4513.9	10	4.218	A
Crane No.4	2016-03-26 18:19:29	E	97.8856	N	36.0354	67.4	328.2	3950.3	12.25	4.08	C
Crane No.4	2016-03-26 18:34:58	E	97.753	N	36.1198	41.1	228.8	3408.9	10	4.066	C
Crane No.4	2016-03-26 18:50:54	E	97.6196	N	36.1942	58.8	332	3173.2	11.24	4.068	D
Crane No.4	2016-03-26 19:00:42	E	97.5775	N	36.2622	49.5	357.7	2926.3	13	4.155	A
Crane No.4	2016-03-26 20:00:51	E	97.5717	N	36.2818	0	309.2	2847.6	13.25	4.142	B
Crane No.4	2016-03-26 21:00:39	E	97.5701	N	36.281	0	0	2828.9	12.25	4.128	A
Crane No.4	2016-03-26 21:16:01	E	97.5703	N	36.281	0	355.9	2834	11.25	4.057	C
Crane No.4	2016-03-26 21:27:58	E	97.5703	N	36.2809	0	0	2829.1	11.25	4.029	C
Crane No.4	2016-03-26 21:39:55	E	97.54	N	36.2833	0	246.9	2807	11.25	4.023	C
Crane No.4	2016-03-26 22:00:28	E	97.54	N	36.2832	0	0	2813.6	13	4.103	A
Crane No.4	2016-03-26 23:00:35	E	97.54	N	36.2832	0	0	2820.1	14	4.098	A
Crane No.4	2016-03-27 00:00:54	E	97.54	N	36.2832	0	0.3	2821.4	12.25	4.088	B
Crane No.4	2016-03-27 01:00:52	E	97.5401	N	36.2832	0	141.6	2814.7	17.25	4.082	B
Crane No.4	2016-03-27 02:00:53	E	97.5401	N	36.2832	0	237.2	2808.2	18	4.074	B
Crane No.4	2016-03-27 03:00:34	E	97.54	N	36.2832	0	0	2822.3	17.25	4.058	A
Crane No.4	2016-03-27 04:00:46	E	97.54	N	36.2833	0	348.1	2805	18	4.053	B
Crane No.4	2016-03-27 05:00:34	E	97.5401	N	36.2832	0	193.8	2811.7	15	4.04	A
Crane No.4	2016-03-27 06:00:35	E	97.54	N	36.2833	0	190.7	2818.3	12	4.031	A
Crane No.4	2016-03-27 07:00:35	E	97.54	N	36.2833	0	105	2816.9	15	4.027	A
Crane No.4	2016-03-27 08:00:44	E	97.7128	N	36.6478	39	26.8	3040.9	12.24	4.021	A
Crane No.4	2016-03-27 09:00:40	E	97.9439	N	36.6806	0	314.8	2998.3	10.25	4.012	A
Crane No.4	2016-03-27 10:00:35	E	97.9456	N	36.6799	0	169.5	2998.8	14.25	4.053	A
Crane No.4	2016-03-27 11:00:39	E	97.9483	N	36.68	0	286.6	3011.8	23	4.092	A
Crane No.4	2016-03-27 12:00:37	E	97.9466	N	36.6814	0	0	3008.5	23.25	4.143	A
Crane No.4	2016-03-27 13:00:35	E	97.944	N	36.6821	0	118.9	3013.5	23	4.182	A
Crane No.4	2016-03-27 14:00:29	E	97.9456	N	36.6799	0	16.5	3014.2	21.25	4.227	A
Crane No.4	2016-03-27 15:00:36	E	97.9447	N	36.6802	4.4	260	3014.7	21	4.252	A
Crane No.4	2016-03-27 16:00:51	E	97.942	N	36.681	0	269.7	3010.7	19.25	4.264	B
Crane No.4	2016-03-27 17:00:34	E	97.9429	N	36.6818	0	287.9	2973.1	11.25	4.259	A
Crane No.4	2016-03-27 18:00:33	E	97.9409	N	36.6827	0	92.4	2996.3	21	4.26	A
Crane No.4	2016-03-27 19:00:30	E	97.9459	N	36.6798	0	47	3015.1	15	4.247	A
Crane No.4	2016-03-27 20:00:29	E	97.9546	N	36.6777	0	318.9	3010.8	11.25	4.217	A
Crane No.4	2016-03-27 21:00:51	E	97.9545	N	36.6776	0	334.9	2996.9	17.25	4.201	B
Crane No.4	2016-03-27 22:00:32	E	97.9545	N	36.6777	0	0	2999.6	15.25	4.186	A
Crane No.4	2016-03-27 23:00:37	E	97.9545	N	36.6777	0	95.9	3001.5	17	4.173	A
Crane No.4	2016-10-31 00:00:51	E	97.9451	N	36.6803	0	0	3012.8	20.24	3.83	B
Crane No.4	2016-10-31 03:00:53	E	97.945	N	36.6803	0	173.8	3003.5	23	3.811	B
Crane No.4	2016-10-31 06:01:53	E	97.9451	N	36.6803	0	134.1	3006.6	20.24	3.806	C
Crane No.4	2016-10-31 09:01:49	E	97.8387	N	36.656	0	224.8	2958.7	21.24	3.807	C
Crane No.4	2016-10-31 12:06:38	Unknow	1000	Unknow	1000	0	0	0	20.24	3.904	Invalid
Crane No.4	2016-10-31 15:02:02	E	97.4258	N	36.2695	2.4	252.3	2810.5	23.24	3.889	C
Crane No.4	2016-10-31 18:00:51	E	97.4168	N	36.2687	0	208.5	2793.2	25	3.892	B
Crane No.4	2016-10-31 21:00:51	E	97.4582	N	36.283	0	8.6	2791.8	25.24	3.852	B
Crane No.4	2016-11-01 00:00:51	E	97.4582	N	36.2829	0	0	2816.6	24	3.833	B
Crane No.4	2016-11-01 03:00:52	E	97.4585	N	36.2829	0	90.1	2802.2	21.24	3.82	B
Crane No.4	2016-11-01 06:00:59	E	97.4589	N	36.2826	0	58.2	2795.3	25	3.809	B
Crane No.4	2016-11-01 09:01:24	E	97.3183	N	36.2148	0	280	196	23.24	3.808	B
Crane No.4	2016-11-01 12:02:35	E	97.4414	N	36.2627	0	149.4	2812.5	20	3.852	C
Crane No.4	2016-11-01 15:04:23	E	97.4156	N	36.2696	0	74.8	2801.8	20	3.898	D
Crane No.4	2016-11-01 18:02:26	E	97.4155	N	36.2694	0	9.3	2764.3	21.24	3.852	C
Crane No.4	2016-11-01 21:00:51	E	97.4588	N	36.2829	0	0	2799.2	21.24	3.832	B
Crane No.4	2016-11-02 00:00:52	E	97.4588	N	36.2829	0	0	2821.1	22.24	3.821	B
Crane No.4	2016-11-02 06:00:51	E	97.4588	N	36.2829	0	275.8	2803.2	21	3.798	B
Crane No.4	2016-11-02 09:02:12	E	97.2948	N	36.2143	2.7	157.5	196.4	25	3.787	C
Crane No.4	2016-11-02 12:02:59	E	97.3066	N	36.2215	0	346.2	2784.6	24	3.858	C
Crane No.4	2016-11-02 15:02:14	E	97.2928	N	36.2064	0	84.6	191.5	23	3.938	C
Crane No.4	2016-11-02 18:01:51	E	97.3172	N	36.2141	0	243.5	2789.1	25	3.919	C
Crane No.4	2016-11-02 21:00:54	E	97.4586	N	36.2829	2.2	284.7	2796.6	20.24	3.869	B
Crane No.4	2016-11-03 00:01:21	E	97.4588	N	36.2829	0	0	2780	22	3.85	B
Crane No.4	2016-11-03 03:01:12	E	97.4595	N	36.2825	0	100.4	2810.7	25	3.829	B
Crane No.4	2016-11-03 06:00:51	E	97.4589	N	36.2828	0	0	2795.8	25	3.819	B
Crane No.4	2016-11-03 09:01:52	E	97.3148	N	36.2089	0	49.4	2829.4	24.24	3.811	C
Crane No.4	2016-11-03 12:03:16	E	97.3141	N	36.2189	0	249	2792.9	23	3.859	D
Crane No.4	2016-11-03 15:01:16	E	97.3173	N	36.2169	0	219.5	2803.1	25.24	3.953	B
Crane No.4	2016-11-03 18:00:55	E	97.3144	N	36.2157	0	291.1	2781.1	25	3.956	B
Crane No.4	2016-11-03 21:01:40	E	97.3204	N	36.2126	0	0	2798.7	25.24	3.916	C
Crane No.4	2016-11-04 00:00:52	E	97.3205	N	36.2125	0	144.2	2780.8	25.24	3.876	B
Crane No.4	2016-11-04 03:01:11	E	97.3203	N	36.2126	0	269.2	2797.9	21.24	3.853	B
Crane No.4	2016-11-04 06:00:44	E	97.3204	N	36.2126	0	0	2800.1	24.24	3.836	A
Crane No.4	2016-11-04 09:01:22	E	97.3162	N	36.2183	0	0	2811.6	20.24	3.827	B
Crane No.4	2016-11-04 12:06:41	Unknow	1000	Unknow	1000	0	0	0	20	3.924	Invalid
Crane No.4	2016-11-04 15:02:48	E	97.3088	N	36.2105	2.1	319.6	195.8	28.24	3.923	C
Crane No.4	2016-11-04 18:02:03	E	97.3257	N	36.2247	0	319.9	195.8	21	3.937	C
Crane No.4	2016-11-04 21:01:22	E	97.35	N	36.2416	0	56.4	2802.1	25.24	3.872	B
Crane No.4	2016-11-05 00:01:19	E	97.3501	N	36.2415	0	83	2783.2	21	3.851	B
Crane No.4	2016-11-05 03:01:52	E	97.4118	N	36.2852	0	301.4	2788.7	22	3.834	C
Crane No.4	2016-11-05 06:01:08	E	97.4119	N	36.2852	0	126	2790.8	22.24	3.823	B
Crane No.4	2016-11-05 09:05:41	E	97.2752	N	36.2287	2	322.4	2771.9	23	3.81	D
Crane No.4	2016-11-05 12:01:45	E	97.277	N	36.2272	0	0	2795.1	25	3.902	C
Crane No.4	2016-11-05 15:00:51	E	97.3145	N	36.2157	0	355	2798.3	24.24	3.969	B
Crane No.4	2016-11-05 18:01:15	E	97.3143	N	36.2163	0	73.4	2790.8	23	3.93	B
Crane No.4	2016-11-05 21:00:57	E	97.4594	N	36.2831	0	168.1	2806.3	20.24	3.88	B
Crane No.4	2016-11-06 00:01:10	E	97.4596	N	36.2832	0	102.5	2808.3	21	3.856	B
Crane No.4	2016-11-06 03:00:51	E	97.4594	N	36.2831	0	0	2806.2	24	3.833	B
Crane No.4	2016-11-06 06:00:44	E	97.4594	N	36.2831	0	301.4	2802.9	20.24	3.823	A
Crane No.4	2016-11-06 09:01:46	E	97.2912	N	36.228	0	322.2	2794	19.24	3.808	C
Crane No.4	2016-11-06 12:01:17	E	97.3174	N	36.2177	0	234.2	2837.4	22.24	3.88	B
Crane No.4	2016-11-06 15:01:10	E	97.3107	N	36.2161	0	0	2780.2	24	3.973	B
Crane No.4	2016-11-06 18:01:40	E	97.3145	N	36.2191	0	0	2797.6	20.24	3.967	C
Crane No.4	2016-11-06 21:05:28	E	97.459	N	36.2826	0	116.6	2794.8	21.24	3.918	D
Crane No.4	2016-11-07 00:00:52	E	97.459	N	36.2828	0	0	2817.1	24.24	3.867	B
Crane No.4	2016-11-07 06:00:59	E	97.459	N	36.2828	1.5	95.2	2786.7	25.24	3.832	B
Crane No.4	2016-11-07 09:02:39	E	97.2995	N	36.2262	0	182.8	2790.9	23.24	3.816	C
Crane No.4	2016-11-07 12:01:51	E	97.3104	N	36.2202	0	96.1	2781.3	20	3.896	C
Crane No.4	2016-11-07 15:01:21	E	97.3133	N	36.2202	0	292.2	2787.8	20	3.945	B
Crane No.4	2016-11-07 18:02:40	E	97.3144	N	36.2161	0	333.5	2795.2	24.24	3.932	C
Crane No.4	2016-11-07 21:01:52	E	97.4588	N	36.2829	0	344.3	2802	20.24	3.877	C
Crane No.4	2016-11-08 00:00:51	E	97.4587	N	36.2829	0	340.1	2778.5	20	3.854	B
Crane No.4	2016-11-08 03:00:55	E	97.4586	N	36.2829	0	125.1	2769.4	21	3.837	B
Crane No.4	2016-11-08 06:00:51	E	97.4587	N	36.2829	0	0	2790.5	20.24	3.824	B
Crane No.4	2016-11-08 09:01:39	E	97.3852	N	36.2232	0	184.4	2813.3	24	3.808	C
Crane No.4	2016-11-08 12:01:15	E	97.2916	N	36.2284	1.9	341.9	2813.3	21.24	3.867	B
Crane No.4	2016-11-08 15:01:40	E	97.3094	N	36.2229	0	278.5	2785	24.24	3.863	C
Crane No.4	2016-11-08 18:02:17	E	97.3014	N	36.2255	0	299.7	2788.4	22.24	3.853	C
Crane No.4	2016-11-08 21:00:52	E	97.4588	N	36.2826	2.2	112.2	2794.2	24.24	3.827	B
Crane No.4	2016-11-09 00:01:10	E	97.4588	N	36.2826	0	119.5	2791.9	25	3.813	B
Crane No.4	2016-11-09 03:00:51	E	97.4589	N	36.2826	0	0	2803.1	20.24	3.801	B
Crane No.4	2016-11-09 06:00:58	E	97.4587	N	36.2827	0	306	2777.6	21	3.786	B
Crane No.4	2016-11-09 09:01:55	E	97.3017	N	36.2254	0	240.4	2805.1	19.24	3.777	C
Crane No.4	2016-11-09 12:06:34	Unknow	1000	Unknow	1000	0	0	0	15.24	3.894	Invalid
Crane No.4	2016-11-09 15:06:42	Unknow	1000	Unknow	1000	0	0	0	7	4.197	Invalid
Crane No.4	2016-11-09 18:02:14	E	98.2384	N	33.7166	4.2	301.7	190.6	14.24	3.876	C
Crane No.4	2016-11-09 21:04:52	E	98.2974	N	33.6917	0	15.5	189.2	20	3.825	D
Crane No.4	2016-11-10 00:00:43	E	98.2867	N	33.7345	0	0	4365.6	23.24	3.805	A
Crane No.4	2016-11-10 03:01:21	E	98.2867	N	33.7345	0	312.1	4377.7	22.24	3.794	B
Crane No.4	2016-11-10 06:00:53	E	98.296	N	33.7297	0	22.6	4376.1	14.24	3.769	B
Crane No.4	2016-11-10 09:01:39	E	98.2957	N	33.7296	0	178.8	4395	19	3.77	C
Crane No.4	2016-11-10 12:06:40	Unknow	1000	Unknow	1000	0	0	0	11	4.021	Invalid
Crane No.4	2016-11-10 15:06:42	Unknow	1000	Unknow	1000	0	0	0	12	4.029	Invalid
Crane No.4	2016-11-10 18:06:42	Unknow	1000	Unknow	1000	0	0	0	12.24	3.908	Invalid
Crane No.4	2016-11-10 21:03:26	E	96.6317	N	32.8618	5.1	173	187.6	15	3.834	D
Crane No.4	2016-11-11 00:04:16	E	96.7901	N	32.9118	0	202.7	4118.5	25.24	3.825	D
Crane No.4	2016-11-11 03:00:52	E	96.7902	N	32.9118	0	0	4114.4	20	3.804	B
Crane No.4	2016-11-11 06:01:12	E	96.7814	N	32.9071	0	355.6	4115.3	21.24	3.795	B
Crane No.4	2016-11-11 09:01:53	E	96.7815	N	32.9069	0	241	4134.2	23	3.791	C
Crane No.4	2016-11-11 12:04:41	E	96.4354	N	32.8841	62.7	259.4	210.2	14	4.01	D
Crane No.4	2016-11-11 15:06:23	Unknow	1000	Unknow	1000	0	0	0	12.24	4.176	Invalid
Crane No.4	2016-11-11 18:06:42	Unknow	1000	Unknow	1000	0	0	0	16	3.961	Invalid
Crane No.4	2016-11-11 21:04:54	E	95.7356	N	31.0203	2.5	337.9	184.5	22	3.896	D
Crane No.4	2016-11-12 00:04:20	E	95.7283	N	31.026	3.3	220.7	252.6	24.24	3.855	D
Crane No.4	2016-11-12 04:01:14	E	95.7392	N	31.0419	0	296.8	4783.2	21.24	3.823	B
Crane No.4	2016-11-12 05:01:19	E	95.7394	N	31.0418	0	0	4761.2	21.24	3.817	B
Crane No.4	2016-11-12 06:00:42	E	95.7394	N	31.0418	0	97.4	4778.2	22.24	3.814	A
Crane No.4	2016-11-12 07:00:50	E	95.7395	N	31.0418	0	285.3	4794.8	22	3.81	B
Crane No.4	2016-11-12 08:01:09	E	95.7392	N	31.0419	0	321.6	4773.7	21	3.804	B
Crane No.4	2016-11-12 09:01:09	E	95.7394	N	31.0417	0	342.2	4756.4	20.24	3.802	B
Crane No.4	2016-11-12 10:00:40	E	95.7307	N	31.0066	47	241.4	5247.3	12	3.964	A
Crane No.4	2016-11-12 11:06:39	Unknow	1000	Unknow	1000	0	0	0	13.24	4.024	Invalid
Crane No.4	2016-11-12 12:06:42	Unknow	1000	Unknow	1000	0	0	0	12	4.109	Invalid
Crane No.4	2016-11-12 13:06:42	Unknow	1000	Unknow	1000	0	0	0	13	4.079	Invalid
Crane No.4	2016-11-12 14:05:02	E	94.8281	N	30.2551	0	205.8	2205.9	24.24	3.933	D
Crane No.4	2016-11-12 15:00:51	E	94.8313	N	30.2484	2.6	172.8	2202.9	22.24	3.955	B
Crane No.4	2016-11-12 16:00:51	E	94.8314	N	30.2487	0	0	2224.3	25.24	3.935	B
Crane No.4	2016-11-12 17:00:34	E	94.825	N	30.2532	0	248	2220.6	23	3.916	A
Crane No.4	2016-11-12 18:02:21	E	94.8256	N	30.2531	0	88.3	2191.2	23	3.896	C
Crane No.4	2016-11-12 19:00:59	E	94.8252	N	30.2533	0	147.8	2200.5	22	3.877	B
Crane No.4	2016-11-12 20:00:47	E	94.8258	N	30.2526	0	158.6	2234	21	3.867	B
Crane No.4	2016-11-12 21:00:51	E	94.8258	N	30.2525	0	0	2220.2	22.24	3.859	B
Crane No.4	2016-11-12 22:00:29	E	94.8258	N	30.2526	0	83.5	2210.6	22.24	3.853	A
Crane No.4	2016-11-12 23:00:38	E	94.8258	N	30.2526	0	4.5	2184.1	22	3.847	A
Crane No.4	2016-11-13 00:00:51	E	94.8258	N	30.2526	0	30.4	2202.9	24	3.839	B
Crane No.4	2016-11-13 01:01:00	E	94.8259	N	30.2526	0	0	2242.6	21.24	3.835	B
Crane No.4	2016-11-13 02:06:42	Unknow	1000	Unknow	1000	0	0	0	23	3.829	Invalid
Crane No.4	2016-11-13 03:00:51	E	94.8258	N	30.2526	0	216.5	2216.1	20.24	3.816	B
Crane No.4	2016-11-13 04:00:51	E	94.8258	N	30.2526	0	0	2203.7	22	3.814	B
Crane No.4	2016-11-13 05:00:56	E	94.8257	N	30.2527	1.8	354.1	2210.5	21	3.81	B
Crane No.4	2016-11-13 06:11:38	E	94.8258	N	30.2527	0	277	2189.4	20.24	3.804	C
Crane No.4	2016-11-13 07:02:51	E	94.8257	N	30.2526	0	301.9	2213.7	22	3.801	C
Crane No.4	2016-11-13 08:00:41	E	94.8257	N	30.2529	0	287.4	2165.2	24.24	3.796	A
Crane No.4	2016-11-13 09:06:41	Unknow	1000	Unknow	1000	0	0	0	24.24	3.791	Invalid
Crane No.4	2016-11-13 10:00:40	E	94.8347	N	30.248	1.8	242.1	2235.9	25.24	3.79	A
Crane No.4	2016-11-13 11:01:44	E	94.8298	N	30.2494	0	0	184	25.24	3.791	C
Crane No.4	2016-11-13 12:06:41	Unknow	1000	Unknow	1000	0	0	0	27	3.787	Invalid
Crane No.4	2016-11-13 13:06:33	E	94.8336	N	30.2586	2.3	244.9	183.9	27.24	3.8	D
Crane No.4	2016-11-13 14:06:41	Unknow	1000	Unknow	1000	0	0	0	27.24	3.835	Invalid
Crane No.4	2016-11-13 15:06:42	Unknow	1000	Unknow	1000	0	0	0	23	3.839	Invalid
Crane No.4	2016-11-13 16:03:37	E	94.8238	N	30.2444	1.9	61.3	184	23.24	3.805	D
Crane No.4	2016-11-13 17:03:33	E	94.8296	N	30.2553	3	221	183.3	25	3.801	D
Crane No.4	2016-11-13 18:04:06	E	94.8287	N	30.2515	0	247.7	2256.8	22	3.787	D
Crane No.4	2016-11-13 19:00:51	E	94.8249	N	30.253	0	310.8	2203.1	20.24	3.774	B
Crane No.4	2016-11-13 20:00:40	E	94.8258	N	30.2526	0	0	2209.8	21.24	3.769	A
Crane No.4	2016-11-13 21:00:44	E	94.8257	N	30.2525	0	209.2	2203.8	21	3.765	A
Crane No.4	2016-11-13 22:01:39	E	94.8258	N	30.2524	0	195.4	2182.1	21	3.761	C
Crane No.4	2016-11-13 23:05:56	E	94.8257	N	30.2526	0	0	2170.3	23	3.756	D
Crane No.4	2016-11-14 00:00:51	E	94.8257	N	30.2526	0	256.8	2205.8	22	3.748	B
Crane No.4	2016-11-14 01:00:51	E	94.8257	N	30.2526	0	256.1	2219.8	21.24	3.746	B
Crane No.4	2016-11-14 02:00:32	E	94.8258	N	30.2526	0	120.9	2203	21.24	3.743	A
Crane No.4	2016-11-14 03:00:35	E	94.8257	N	30.2527	0	189.9	2219.3	22	3.736	A
Crane No.4	2016-11-14 04:00:39	E	94.8257	N	30.2526	0	333.6	2219.4	22	3.734	A
Crane No.4	2016-11-14 05:00:31	E	94.8256	N	30.2526	0	320.9	2186.3	22	3.732	A
Crane No.4	2016-11-14 06:00:52	E	94.8256	N	30.2526	0	3.4	2190.4	21	3.729	B
Crane No.4	2016-11-14 07:03:25	E	94.826	N	30.2527	0	325.9	1936.8	21	3.727	D
Crane No.4	2016-11-14 08:00:41	E	94.826	N	30.253	0	0	2189.8	25	3.72	A
Crane No.4	2016-11-14 09:01:51	E	94.8345	N	30.248	0	10.4	2208.1	25.24	3.719	C
Crane No.4	2016-11-14 10:00:49	E	94.8304	N	30.2521	0	138	2229	21.24	3.726	B
Crane No.4	2016-11-14 11:01:27	E	94.8329	N	30.2483	0	263.5	2238.2	20	3.75	B
Crane No.4	2016-11-14 12:01:46	E	94.8334	N	30.2483	0	89.3	2214.7	24	3.773	C
Crane No.4	2016-11-14 13:01:09	E	94.8198	N	30.2549	0	172.9	2224.8	24.24	3.797	B
Crane No.4	2016-11-14 14:01:09	E	94.8188	N	30.2522	0	0	2204.4	27.24	3.806	B
Crane No.4	2016-11-14 15:02:00	E	94.8186	N	30.2522	3.7	359.9	2145.3	25.24	3.793	C
Crane No.4	2016-11-14 16:01:51	E	94.8186	N	30.2522	0	65.5	2209.1	23.24	3.788	C
Crane No.4	2016-11-14 17:00:29	E	94.8299	N	30.2521	0	149.8	2205.5	22	3.813	A
Crane No.4	2016-11-14 18:00:35	E	94.8308	N	30.2522	0	0	2225.7	24.24	3.794	A
Crane No.4	2016-11-14 19:01:45	E	94.8379	N	30.2534	0	219.6	2198.2	20.24	3.783	C
Crane No.4	2016-11-14 20:01:18	E	94.8315	N	30.2559	0	263.9	2194.6	24.24	3.774	B
Crane No.4	2016-11-14 21:00:51	E	94.8315	N	30.2559	0	87.1	2209.5	25.24	3.766	B
Crane No.4	2016-11-14 22:00:44	E	94.8316	N	30.256	1.5	15.7	2219.4	24.24	3.76	A
Crane No.4	2016-11-14 23:01:02	E	94.8315	N	30.256	0	320.6	2160.4	20.24	3.754	B
Crane No.4	2016-11-15 00:04:11	E	94.8315	N	30.2559	0	350.6	2225.4	22.24	3.749	D
Crane No.4	2016-11-15 01:06:04	E	94.8316	N	30.2565	0	258	2430.3	21.24	3.739	D
Crane No.4	2016-11-15 02:01:01	E	94.8316	N	30.2559	0	84.8	2191	20.24	3.724	B
Crane No.4	2016-11-15 03:01:09	E	94.8313	N	30.2559	0	25.8	2249.4	20.24	3.712	B
Crane No.4	2016-11-15 06:01:30	E	94.8315	N	30.2557	0	170.1	2216.6	21	3.705	B
Crane No.4	2016-11-15 09:06:38	Unknow	1000	Unknow	1000	0	0	0	20	3.707	Invalid
Crane No.4	2016-11-15 12:03:13	E	94.8326	N	30.2484	0	333.8	2222.6	26.24	3.819	D
Crane No.4	2016-11-15 15:06:42	Unknow	1000	Unknow	1000	0	0	0	23.24	3.833	Invalid
Crane No.4	2016-11-15 18:06:04	E	94.8345	N	30.2478	3.1	152.9	2200.4	20.24	3.804	D
Crane No.4	2016-11-15 21:00:49	E	94.8266	N	30.2545	0	0	2214.2	20.24	3.78	B
Crane No.4	2016-11-16 00:02:13	E	94.8091	N	30.2518	0	152.6	183.9	20.24	3.766	C
Crane No.4	2016-11-16 03:00:51	E	94.8266	N	30.2545	0	0	2208.7	25	3.75	B
Crane No.4	2016-11-16 06:00:51	E	94.8267	N	30.2545	0	0	2210.1	22	3.739	B
Crane No.4	2016-11-16 09:01:45	E	94.8328	N	30.2472	0	204.8	2202.1	23.24	3.733	C
Crane No.4	2016-11-16 12:02:54	E	94.8113	N	30.252	0	310.5	2340.3	25	3.792	C
Crane No.4	2016-11-16 15:06:42	Unknow	1000	Unknow	1000	0	0	0	24.24	3.813	Invalid
Crane No.4	2016-11-16 18:05:47	E	94.8348	N	30.2481	0	268.5	2208	21	3.795	D
Crane No.4	2016-11-16 21:01:03	E	94.8221	N	30.2596	0	140.9	2221.9	24.24	3.765	B
Crane No.4	2016-11-17 00:06:35	Unknow	1000	Unknow	1000	0	0	0	21.24	3.752	Invalid
Crane No.4	2016-11-17 03:01:14	E	94.8226	N	30.2597	0	83.8	2106.1	21	3.724	B
Crane No.4	2016-11-17 06:01:43	E	94.8223	N	30.2596	0	61.2	2198.7	21	3.714	C
Crane No.4	2016-11-17 09:02:48	E	94.8294	N	30.2567	0	0	184	23.24	3.711	C
Crane No.4	2016-11-17 12:06:29	Unknow	1000	Unknow	1000	0	0	0	23	3.808	Invalid
Crane No.4	2016-11-17 15:06:39	Unknow	1000	Unknow	1000	0	0	0	25.24	3.828	Invalid
Crane No.4	2016-11-17 18:06:39	E	94.8193	N	30.2648	0	12.5	184.3	24.24	3.808	D
Crane No.4	2016-11-17 21:01:43	E	94.8408	N	30.2536	1.5	218.7	2210.9	24.24	3.78	C
Crane No.4	2016-11-18 00:04:44	E	94.8414	N	30.2534	0	178.7	2211	25	3.763	D
Crane No.4	2016-11-18 03:01:01	E	94.8415	N	30.2534	0	56.3	2200.9	24.24	3.741	B
Crane No.4	2016-11-18 06:01:18	E	94.8416	N	30.2535	0	0	2129.6	25	3.728	B
Crane No.4	2016-11-18 09:01:16	E	94.8351	N	30.2477	0	117.6	2278.2	20	3.722	B
Crane No.4	2016-11-18 12:06:42	Unknow	1000	Unknow	1000	0	0	0	20.24	3.832	Invalid
Crane No.4	2016-11-18 15:06:40	Unknow	1000	Unknow	1000	0	0	0	28	3.852	Invalid
Crane No.4	2016-11-18 18:04:41	E	94.8424	N	30.2527	1.8	57.1	2179.7	21	3.811	D
Crane No.4	2016-11-18 21:01:39	E	94.8409	N	30.2536	0	53.7	2181.6	25	3.793	C
Crane No.4	2016-11-19 00:00:51	E	94.8409	N	30.2536	0	0	2211	25	3.783	B
Crane No.4	2016-11-19 03:00:51	E	94.8409	N	30.2535	0	202.5	2225.8	20	3.764	B
Crane No.4	2016-11-19 06:04:02	E	94.8408	N	30.2534	0	253.7	2314.9	24.24	3.754	D
Crane No.4	2016-11-19 09:01:39	E	94.8362	N	30.2425	0	43.2	2200.2	19	3.739	C
Crane No.4	2016-11-19 12:06:42	Unknow	1000	Unknow	1000	0	0	0	19	3.881	Invalid
Crane No.4	2016-11-19 15:04:34	E	94.8112	N	30.2551	0	299.3	2214.2	20.24	3.909	D
Crane No.4	2016-11-19 18:02:21	E	94.8329	N	30.2514	0	233.7	2202.1	24.24	3.824	C
Crane No.4	2016-11-19 21:01:53	E	94.8409	N	30.2536	0	0	2218.5	25.24	3.804	C
Crane No.4	2016-11-20 00:01:38	E	94.8408	N	30.2534	0	114.2	2209	20.24	3.795	C
Crane No.4	2016-11-20 03:01:52	E	94.841	N	30.2536	0	0	2183.6	20.24	3.784	C
Crane No.4	2016-11-20 06:00:51	E	94.8409	N	30.2535	0	0	2234.8	25	3.769	B
Crane No.4	2016-11-20 09:03:16	E	94.8599	N	30.2588	0	327.7	2170.5	20.24	3.756	D
Crane No.4	2016-11-20 12:06:42	Unknow	1000	Unknow	1000	0	0	0	18.24	3.902	Invalid
Crane No.4	2016-11-20 15:06:40	Unknow	1000	Unknow	1000	0	0	0	17	3.969	Invalid
Crane No.4	2016-11-20 18:05:54	E	94.2339	N	29.2389	3.1	16.6	183.7	22	3.856	D
Crane No.4	2016-11-20 21:05:35	E	94.2681	N	29.2543	0	356.4	2936.1	25	3.823	D
Crane No.4	2017-03-19 00:01:09	E	94.3821	N	29.3293	0	158.1	2915.7	24	3.887	B
Crane No.4	2017-03-19 01:01:14	E	94.3821	N	29.3294	0	293	2928.4	25.24	3.881	B
Crane No.4	2017-03-19 02:00:37	E	94.3821	N	29.3295	0	338.2	2936.6	25.24	3.875	A
Crane No.4	2017-03-19 03:00:38	E	94.3821	N	29.3294	0	0	2928.9	24.24	3.83	A
Crane No.4	2017-03-19 04:00:50	E	94.3821	N	29.3294	0	24.8	2913	22	3.86	B
Crane No.4	2017-03-19 05:00:41	E	94.3821	N	29.3294	0	0	2920	25	3.858	A
Crane No.4	2017-03-19 06:00:40	E	94.3821	N	29.3294	0	0	2924.8	20	3.856	A
Crane No.4	2017-03-19 07:00:49	E	94.382	N	29.3294	0	108.2	2923	21	3.853	B
Crane No.4	2017-03-19 08:01:08	E	94.389	N	29.3292	0	162.3	2918.4	22.24	3.848	B
Crane No.4	2017-03-19 09:03:08	E	94.3905	N	29.33	0	141.7	2921.5	20	3.846	D
Crane No.4	2017-03-19 10:01:51	E	94.4137	N	29.3612	58.2	37.3	2985	21.24	3.865	C
Crane No.4	2017-03-19 11:00:52	E	94.4211	N	29.3638	1.6	101.5	2915.1	25	3.87	B
Crane No.4	2017-03-19 12:01:08	E	94.4214	N	29.3647	0	254.6	2927.6	21.24	3.889	B
Crane No.4	2017-03-19 13:05:53	E	94.4244	N	29.5057	70	15.8	3498.5	19	4.073	D
Crane No.4	2017-03-19 14:06:21	Unknow	1000	Unknow	1000	0	0	0	15	4.204	Invalid
Crane No.4	2017-03-19 15:04:32	E	94.0026	N	30.1325	2	125.6	3295.5	14	4.116	D
Crane No.4	2017-03-19 16:06:21	E	94.0046	N	30.1335	0	245	198.4	20	3.995	D
Crane No.4	2017-03-19 17:03:02	E	93.9999	N	30.1335	0	191.5	2690.7	20	3.978	D
Crane No.4	2017-03-19 18:04:32	E	93.9999	N	30.1338	0	117.9	3465.5	20	3.976	D
Crane No.4	2017-03-19 19:01:01	E	94.0001	N	30.1337	0	333.8	3492.4	18.24	3.954	B
Crane No.4	2017-03-19 20:03:20	E	94.0003	N	30.1337	0	256.2	3480	21	3.94	D
Crane No.4	2017-03-19 21:00:32	E	94.0004	N	30.1327	3.4	295.8	3430.4	23.24	3.928	A
Crane No.4	2017-03-19 22:00:50	E	94.0011	N	30.1327	0	0	3484.3	24.24	3.921	B
Crane No.4	2017-03-19 23:06:41	Unknow	1000	Unknow	1000	0	0	0	23	3.911	Invalid
Crane No.4	2017-03-20 00:01:00	E	94.0011	N	30.1323	0	0	3486.1	22	3.888	B
Crane No.4	2017-03-20 01:00:50	E	94.0011	N	30.1323	0	135.8	3489.6	22	3.882	B
Crane No.4	2017-03-20 02:00:33	E	94.0011	N	30.1324	3.3	21.1	3504	23.24	3.875	A
Crane No.4	2017-03-20 03:00:50	E	94.0011	N	30.1324	0	264.3	3501.2	24.24	3.866	B
Crane No.4	2017-03-20 04:00:40	E	94.0011	N	30.1323	0	187.9	3506	25	3.863	A
Crane No.4	2017-03-20 05:00:43	E	94.0011	N	30.1323	0	303.2	3486.7	25.24	3.859	A
Crane No.4	2017-03-20 06:00:34	E	94.0011	N	30.1324	0	62	3478.7	20	3.856	A
Crane No.4	2017-03-20 07:00:59	E	94.0011	N	30.1324	0	0	3452	25.24	3.853	B
Crane No.4	2017-03-20 08:01:30	E	94.0009	N	30.1325	2.2	197.8	3488.3	22	3.848	B
Crane No.4	2017-03-20 09:02:21	E	94.024	N	30.0718	48.4	153.3	3560	16	3.856	C
Crane No.4	2017-03-20 10:01:17	E	94.0276	N	30.0598	0	0	3458.5	20.24	3.845	B
Crane No.4	2017-03-20 11:01:51	E	94.028	N	30.0559	2.2	120.9	3462.4	25.24	3.857	C
Crane No.4	2017-03-20 12:01:48	E	94.0279	N	30.0548	0	0	3454.2	23	3.896	C
Crane No.4	2017-03-20 13:01:44	E	94.0281	N	30.0542	0	69.2	3477.7	22.24	3.984	C
Crane No.4	2017-03-20 14:01:38	E	94.0275	N	30.054	0	219.1	3463.9	24	4.04	C
Crane No.4	2017-03-20 15:01:14	E	94.0271	N	30.0537	0	0	3501.1	24	4.048	B
Crane No.4	2017-03-20 16:01:08	E	94.0278	N	30.0606	0	0	3498.7	21.24	4.033	B
Crane No.4	2017-03-20 17:01:08	E	94.0277	N	30.0593	0	261.3	3453.2	22	4.02	B
Crane No.4	2017-03-20 18:00:52	E	94.0265	N	30.0606	0	319.5	3497.3	23	4.011	B
Crane No.4	2017-03-20 19:01:20	E	94.0013	N	30.1333	0	236.6	3512.4	18.24	4.005	B
Crane No.4	2017-03-20 20:02:35	E	94.0012	N	30.1333	1.7	335.5	3151.5	20	3.989	C
Crane No.4	2017-03-20 21:01:01	E	94.0009	N	30.1331	0	271.6	3501.8	23	3.98	B
Crane No.4	2017-03-20 22:04:55	E	94.0059	N	30.1345	0	195.8	184.4	25.24	3.973	D
Crane No.4	2017-03-20 23:00:34	E	94.0006	N	30.1331	0	291.9	3356.4	23	3.957	A
Crane No.4	2017-03-21 00:00:50	E	94.0009	N	30.1331	0	216.4	3472.5	21.24	3.954	B
Crane No.4	2017-03-21 01:00:50	E	94.0009	N	30.1331	0	0	3509.7	22	3.944	B
Crane No.4	2017-03-21 02:00:55	E	94.0006	N	30.1333	0	140.9	3560.4	24	3.938	B
Crane No.4	2017-03-21 03:00:34	E	94.001	N	30.1331	0	139	3490.2	24	3.922	A
Crane No.4	2017-03-21 04:00:50	E	94.0009	N	30.1332	0	109.5	3460.7	23.24	3.915	B
Crane No.4	2017-03-21 05:00:50	E	94.0009	N	30.1332	0	2.1	3480.3	22	3.904	B
Crane No.4	2017-03-21 06:00:34	E	94.0009	N	30.1332	0	88.1	3479.9	22.24	3.895	A
Crane No.4	2017-03-21 07:01:00	E	94.0009	N	30.1331	0	319.2	3471.7	25	3.889	B
Crane No.4	2017-03-21 08:01:02	E	94.0008	N	30.1329	0	17.1	3516.5	20	3.884	B
Crane No.4	2017-03-21 09:00:50	E	94.001	N	30.133	1.5	157.5	3477.5	21.24	3.879	B
Crane No.4	2017-03-21 10:01:35	E	94.0278	N	30.0539	0	67.8	3481.6	22	3.874	C
Crane No.4	2017-03-21 11:00:40	E	94.0277	N	30.0541	0	0	3468.2	22.24	3.877	A
Crane No.4	2017-03-21 12:01:34	E	94.0162	N	30.0549	18.2	339.5	4654.8	18.24	3.957	C
Crane No.4	2017-03-21 13:02:38	E	93.9743	N	30.2053	0	60.6	3496.5	25	4	C
Crane No.4	2017-03-21 14:00:40	E	93.9715	N	30.2037	0	234.6	3497.1	25	4.052	A
Crane No.4	2017-03-21 15:01:51	E	93.9749	N	30.2011	0	157.2	3519.5	20	4.069	C
Crane No.4	2017-03-21 16:01:08	E	94.0279	N	30.0538	0	159	3489.3	20.24	4.123	B
Crane No.4	2017-03-21 17:01:44	E	94.0278	N	30.0536	0	154.9	3434.7	24	4.11	C
Crane No.4	2017-03-21 18:01:20	E	94.0277	N	30.0538	0	147.9	3482.1	21	4.109	B
Crane No.4	2017-03-21 19:01:09	E	94.0276	N	30.0539	0	0	3495.6	23	4.081	B
Crane No.4	2017-03-21 20:00:31	E	94.0277	N	30.0538	0	95	3474.9	21	4.064	A
Crane No.4	2017-03-21 21:00:29	E	94.0008	N	30.133	0	71.1	3461.8	23.24	4.055	A
Crane No.4	2017-03-21 22:01:00	E	94.0011	N	30.1326	0	77.4	3461.3	24.24	4.046	B
Crane No.4	2017-03-21 23:01:29	E	94.0011	N	30.1327	1.5	66.2	3427.4	25.24	4.037	B
Crane No.4	2017-03-22 00:00:58	E	94.0011	N	30.1326	0	0	3484.8	22	4.028	B
Crane No.4	2017-03-22 01:00:36	E	94.0011	N	30.1326	0	139.5	3501.3	21	4.019	A
Crane No.4	2017-03-22 02:00:59	E	94.0011	N	30.1326	0	0	3473.8	21	4.012	B
Crane No.4	2017-03-22 03:00:50	E	94.0011	N	30.1326	0	318.8	3485	21	3.998	B
Crane No.4	2017-03-22 04:00:37	E	94.0011	N	30.1326	0	343.5	3482.8	20.24	3.992	A
Crane No.4	2017-03-22 05:01:09	E	94.0012	N	30.1324	2	163.9	3446.3	20.24	3.985	B
Crane No.4	2017-03-22 06:00:33	E	94.0011	N	30.1326	0	55.4	3491.7	20	3.978	A
Crane No.4	2017-03-22 07:00:35	E	94.0011	N	30.1326	0	177.7	3514.1	25.24	3.972	A
Crane No.4	2017-03-22 08:00:50	E	94.001	N	30.1326	0	302	3528.3	22.24	3.964	B
Crane No.4	2017-03-22 09:00:41	E	94.0012	N	30.1325	0	291.6	3499	22.24	3.958	A
Crane No.4	2017-03-22 10:00:51	E	94.0273	N	30.0534	0	316.8	3476.4	20.24	3.953	B
Crane No.4	2017-03-22 11:02:38	E	94.0279	N	30.0544	0	73.5	3484.8	25.24	3.967	C
Crane No.4	2017-03-22 12:01:19	E	94.0127	N	30.0951	51.7	311.2	3784.2	16.24	4.108	B
Crane No.4	2017-03-22 13:06:28	Unknow	1000	Unknow	1000	0	0	0	14	4.205	Invalid
Crane No.4	2017-03-22 14:06:36	Unknow	1000	Unknow	1000	0	0	0	12	4.219	Invalid
Crane No.4	2017-03-22 15:06:42	Unknow	1000	Unknow	1000	0	0	0	14	4.232	Invalid
Crane No.4	2017-03-22 16:06:42	Unknow	1000	Unknow	1000	0	0	0	15	4.22	Invalid
Crane No.4	2017-03-22 17:06:42	Unknow	1000	Unknow	1000	0	0	0	14.24	4.233	Invalid
Crane No.4	2017-03-22 18:04:22	E	96.4482	N	32.2936	1.6	319.7	187.5	19	4.139	D
Crane No.4	2017-03-22 19:05:24	E	96.4655	N	32.2922	3.1	288.7	280.2	25.24	4.086	D
Crane No.4	2017-03-22 20:01:46	E	96.4673	N	32.2844	1.6	36.1	3652.6	24	4.059	C
Crane No.4	2017-03-22 21:00:42	E	96.4672	N	32.2845	0	165.2	3641	25.24	4.046	A
Crane No.4	2017-03-22 22:00:41	E	96.4666	N	32.2839	0	309.2	3548.8	20.24	4.037	A
Crane No.4	2017-03-22 23:01:00	E	96.4672	N	32.2846	0	127.1	3630.9	21	4.028	B
Crane No.4	2017-03-23 00:00:50	E	96.4672	N	32.2843	0	223.7	3633.7	25.24	4.018	B
Crane No.4	2017-03-23 01:00:42	E	96.4672	N	32.2843	2.1	347.3	3674.5	24.24	4.011	A
Crane No.4	2017-03-23 02:00:32	E	96.4672	N	32.2844	0	0	3656.3	21.24	4.005	A
Crane No.4	2017-03-23 03:00:31	E	96.4672	N	32.2845	0	11.3	3655.2	25.24	3.991	A
Crane No.4	2017-03-23 04:00:25	E	96.4672	N	32.2845	0	286.6	3637.6	20.24	3.986	A
Crane No.4	2017-03-23 05:00:29	E	96.4672	N	32.2845	0	139.3	3647.6	24	3.979	A
Crane No.4	2017-03-23 06:00:38	E	96.4671	N	32.2843	0	157.6	3614.8	23	3.973	A
Crane No.4	2017-03-23 07:00:35	E	96.4668	N	32.2851	0	233.9	3639.7	22.24	3.967	A
Crane No.4	2017-03-23 08:00:59	E	96.4666	N	32.2852	0	146.8	3631.7	23	3.96	B
Crane No.4	2017-03-23 09:01:07	E	96.4666	N	32.2853	0	17.4	3645.2	20.24	3.963	B
Crane No.4	2017-03-23 10:01:08	E	96.4666	N	32.2856	0	124	3655.9	21	3.96	B
Crane No.4	2017-03-23 11:00:45	E	96.4662	N	32.2875	0	20.8	3620.8	25	3.98	A
Crane No.4	2017-03-23 12:02:09	E	96.5813	N	32.5314	69.8	12	5273.4	14	4.134	C
Crane No.4	2017-03-23 13:01:46	E	97.128	N	33.1116	93.6	57.5	4031.7	10.24	4.213	C
Crane No.4	2017-03-23 14:00:58	E	97.5519	N	33.3758	2.3	246.9	6365.7	25.24	4.092	B
Crane No.4	2017-03-23 15:01:14	E	97.5292	N	33.3825	0	0	4148.4	25.24	4.142	B
Crane No.4	2017-03-23 16:00:50	E	97.5295	N	33.3829	0	292	4185.2	22	4.141	B
Crane No.4	2017-03-23 17:00:50	E	97.5295	N	33.3828	0	74.4	4171.4	19.24	4.148	B
Crane No.4	2017-03-23 18:00:30	E	97.5294	N	33.383	0	235.5	4193	19.24	4.127	A
Crane No.4	2017-03-23 19:00:35	E	97.5495	N	33.3726	0	120.2	4179.1	18	4.103	A
Crane No.4	2017-03-23 20:00:52	E	97.5442	N	33.3773	0	278.6	4111.9	21.24	4.089	B
Crane No.4	2017-03-23 21:00:50	E	97.5444	N	33.3772	0	295.8	4183.3	23.24	4.079	B
Crane No.4	2017-03-23 22:01:20	E	97.5444	N	33.3772	0	116.5	4163	24.24	4.068	B
Crane No.4	2017-03-23 23:00:51	E	97.5443	N	33.3773	0	135.2	4175	25	4.057	B
Crane No.4	2017-03-24 00:00:50	E	97.5444	N	33.3772	0	9.5	4163.1	22	4.05	B
Crane No.4	2017-03-24 01:00:33	E	97.5444	N	33.3772	0	135.9	4185.1	24.24	4.039	A
Crane No.4	2017-03-24 02:00:31	E	97.5444	N	33.3771	0	6.2	4168.2	23	4.03	A
Crane No.4	2017-03-24 03:00:34	E	97.5444	N	33.3772	0	203.3	4162.7	25	4.017	A
Crane No.4	2017-03-24 04:00:43	E	97.5444	N	33.3771	0	133.9	4180.6	20	4.012	A
Crane No.4	2017-03-24 05:00:50	E	97.5444	N	33.3772	0	234.8	4164.8	24.24	4.005	B
Crane No.4	2017-03-24 06:00:33	E	97.5443	N	33.3772	0	254.9	4170.8	25	3.998	A
Crane No.4	2017-03-24 07:00:39	E	97.5445	N	33.3773	1.8	10.7	4172.2	23	3.99	A
Crane No.4	2017-03-24 08:00:37	E	97.4988	N	33.3878	65.8	280	4166.8	15.24	3.981	A
Crane No.4	2017-03-24 09:00:53	E	97.4909	N	33.3787	0	296.2	4150	20	3.979	B
Crane No.4	2017-03-24 10:00:50	E	97.4914	N	33.3784	0	0	4188.8	23.24	3.984	B
Crane No.4	2017-03-24 11:01:47	E	97.4913	N	33.3785	0	330.5	4178	21.24	3.989	C
Crane No.4	2017-03-24 12:00:40	E	97.4921	N	33.3764	0	0	4187.1	22	3.982	A
Crane No.4	2017-03-24 13:00:50	E	97.4945	N	33.3776	0	293.5	4187.4	25	3.99	B
Crane No.4	2017-03-24 14:00:39	E	97.4951	N	33.3775	0	171	4174.2	23	3.993	A
Crane No.4	2017-03-24 15:01:33	E	97.4947	N	33.3775	0	85.3	4164.1	22.24	3.999	C
Crane No.4	2017-03-24 16:00:45	E	97.4945	N	33.3777	0	0	4170.4	25	3.986	A
Crane No.4	2017-03-24 17:00:52	E	97.4942	N	33.375	2.9	335.7	188.6	22.24	3.983	B
Crane No.4	2017-03-24 18:03:47	E	97.4945	N	33.3776	0	125.7	4157.8	21.24	3.982	D
Crane No.4	2017-03-24 19:00:58	E	97.5096	N	33.3732	4.4	113.7	4197.7	19	3.961	B
Crane No.4	2017-03-24 20:01:50	E	97.5401	N	33.3772	0	158.7	4163.4	18	3.951	C
Crane No.4	2017-03-24 21:00:41	E	97.5399	N	33.3772	0	313.3	4117.4	21.24	3.947	A
Crane No.4	2017-03-24 22:00:59	E	97.5403	N	33.3769	0	153.6	4177.1	23.24	3.943	B
Crane No.4	2017-03-24 23:00:50	E	97.5401	N	33.3773	0	337.6	4173.7	24	3.938	B
Crane No.4	2017-03-25 00:00:51	E	97.5403	N	33.3772	1.8	181.8	4143.7	24	3.932	B
Crane No.4	2017-03-25 01:00:33	E	97.5402	N	33.3771	0	168	4171.9	24	3.926	A
Crane No.4	2017-03-25 02:00:31	E	97.5402	N	33.3771	0	358.9	4173.2	21.24	3.917	A
Crane No.4	2017-03-25 03:00:34	E	97.5403	N	33.3772	0	65.6	4162.4	20.24	3.899	A
Crane No.4	2017-03-25 04:00:31	E	97.5402	N	33.3772	0	108	4162.1	20	3.892	A
Crane No.4	2017-03-25 05:00:34	E	97.5402	N	33.3772	0	13.8	4158.1	18.24	3.885	A
Crane No.4	2017-03-25 06:00:41	E	97.5402	N	33.3771	0	299.5	4167.4	22.24	3.883	A
Crane No.4	2017-03-25 07:00:30	E	97.5402	N	33.3771	0	0	4175.9	22.24	3.878	A
Crane No.4	2017-03-25 08:00:40	E	97.5401	N	33.3772	0	288.6	4152.9	22.24	3.875	A
Crane No.4	2017-03-25 09:00:32	E	97.5403	N	33.3772	0	269.7	4171.8	21	3.878	A
Crane No.4	2017-03-25 10:00:34	E	97.5187	N	33.3811	0	196.2	4175.8	16	3.893	A
Crane No.4	2017-03-25 11:02:42	E	97.4973	N	33.3795	4.5	91.9	4178.5	19	3.906	C
Crane No.4	2017-03-25 12:00:50	E	97.4945	N	33.3776	0	104.4	4174.8	16.24	3.968	B
Crane No.4	2017-03-25 13:00:59	E	97.5104	N	33.3732	0	236.8	4179.8	19.24	4.018	B
Crane No.4	2017-03-25 14:00:46	E	97.5081	N	33.3789	0	242	4184.3	18	4.076	B
Crane No.4	2017-03-25 15:01:11	E	97.5104	N	33.3732	0	240.4	4150.5	20.24	4.169	B
Crane No.4	2017-03-25 16:00:50	E	97.5103	N	33.3734	0	0	4186.9	23.24	4.133	B
Crane No.4	2017-03-25 17:00:34	E	97.5104	N	33.3731	0	268.9	4146.8	22	4.212	A
Crane No.4	2017-03-25 18:00:54	E	97.5105	N	33.3732	0	315.5	4170.4	20	4.2	B
Crane No.4	2017-03-25 19:01:20	E	97.5105	N	33.3731	0	264.2	4190.9	19.24	4.178	B
Crane No.4	2017-03-25 20:00:33	E	97.5342	N	33.3792	0	270.9	4185.4	14	4.131	A
Crane No.4	2017-03-25 21:00:34	E	97.5401	N	33.3772	0	94.1	4175.2	22	4.121	A
Crane No.4	2017-03-25 22:00:31	E	97.5402	N	33.3772	0	126	4178.2	24	4.107	A
Crane No.4	2017-03-25 23:00:30	E	97.5402	N	33.3772	0	0	4168.5	22.24	4.093	A
Crane No.4	2017-03-26 00:00:50	E	97.5401	N	33.3772	0	207	4153.9	24	4.083	B
Crane No.4	2017-03-26 01:00:43	E	97.5402	N	33.3772	0	47.8	4179.5	24	4.072	A
Crane No.4	2017-03-26 02:00:30	E	97.5402	N	33.3772	0	9.1	4181.1	25	4.062	A
Crane No.4	2017-03-26 03:00:34	E	97.5404	N	33.3772	0	0	4167.3	24.24	4.046	A
Crane No.4	2017-03-26 04:00:34	E	97.5403	N	33.3772	0	0	4164.8	20.24	4.04	A
Crane No.4	2017-03-26 05:00:28	E	97.5403	N	33.3772	0	265.6	4164.9	25	4.032	A
Crane No.4	2017-03-26 06:00:36	E	97.5401	N	33.3772	0	233.6	4165.1	25.24	4.024	A
Crane No.4	2017-03-26 07:00:53	E	97.5403	N	33.3773	0	172.8	4164	25.24	4.017	B
Crane No.4	2017-03-26 08:00:57	E	97.54	N	33.3772	0	95	4172	23.24	4.008	B
Crane No.4	2017-03-26 09:00:33	E	97.5102	N	33.3719	0	233.9	4183.6	21.24	4.004	A
Crane No.4	2017-03-26 10:02:13	E	97.5054	N	33.3685	0	134.6	4175.3	23.24	4.013	C
Crane No.4	2017-03-26 11:00:50	E	97.5052	N	33.37	0	0	4171.7	25.24	4.01	B
Crane No.4	2017-03-26 12:01:29	E	97.5503	N	33.6883	67.1	15.8	5084.8	12	4.196	B
Crane No.4	2017-03-26 13:01:20	E	97.5346	N	33.5872	59.5	193.4	5104.5	13	4.214	B
Crane No.4	2017-03-26 14:00:42	E	97.5222	N	33.3778	0	144.1	4183.4	25	4.096	A
Crane No.4	2017-03-26 15:00:40	E	97.5151	N	33.3735	0	183.7	4165.8	21	4.213	A
Crane No.4	2017-03-26 16:01:12	E	97.5158	N	33.3744	0	208.6	4110.7	20.24	4.234	B
Crane No.4	2017-03-26 17:01:34	E	97.5107	N	33.3736	1.6	245.9	4167.1	20.24	4.199	C
Crane No.4	2017-03-26 18:01:44	E	97.5105	N	33.3731	0	0	4178.6	20.24	4.159	C
Crane No.4	2017-03-26 19:00:50	E	97.5105	N	33.373	0	161.5	4180.9	21	4.133	B
Crane No.4	2017-03-26 20:00:36	E	97.5107	N	33.3731	0	347.4	4191.2	22	4.118	A
Crane No.4	2017-03-26 21:00:50	E	97.5154	N	33.3753	0	252.4	4162.5	25.24	4.108	B
Crane No.4	2017-03-26 22:00:29	E	97.5154	N	33.3753	0	125.1	4176.6	20	4.096	A
Crane No.4	2017-03-26 23:00:50	E	97.5154	N	33.3754	0	275	4158.1	24.24	4.085	B
Crane No.4	2017-03-27 00:00:57	E	97.5154	N	33.3752	2.4	197.6	4170.1	24.24	4.074	B
Crane No.4	2017-03-27 01:00:50	E	97.5154	N	33.3753	0	114.6	4184.3	23	4.062	B
Crane No.4	2017-03-27 02:00:34	E	97.5154	N	33.3753	0	325.4	4176	23.24	4.02	A
Crane No.4	2017-03-27 03:00:34	E	97.5154	N	33.3753	0	308.5	4182.7	23	4.039	A
Crane No.4	2017-03-27 04:00:33	E	97.5152	N	33.3752	0	49.7	4179.3	22	4.032	A
Crane No.4	2017-03-27 05:00:46	E	97.5154	N	33.3753	0	311.3	4180.9	23	4.024	B
Crane No.4	2017-03-27 06:00:37	E	97.5154	N	33.3753	0	327.5	4172.7	22	4.016	A
Crane No.4	2017-03-27 07:00:35	E	97.5155	N	33.3753	0	75.2	4176.1	21.24	4.009	A
Crane No.4	2017-03-27 08:00:34	E	97.5154	N	33.3753	0	80.5	4176.1	21	4.004	A
Crane No.4	2017-03-27 09:00:33	E	97.5114	N	33.3735	2.5	347.9	4180.6	23.24	4.011	A
Crane No.4	2017-03-27 10:00:41	E	97.5084	N	33.3699	0	0	4194.6	21.24	4.006	A
Crane No.4	2017-03-27 11:03:04	E	97.5035	N	33.3832	16.5	106.2	4308.8	17	4.071	D
Crane No.4	2017-03-27 12:01:01	E	97.4915	N	33.3783	0	198	4175.6	23.24	4.079	B
Crane No.4	2017-03-27 13:01:36	E	97.4913	N	33.3783	0	226.7	4182.7	21.24	4.123	C
Crane No.4	2017-03-27 14:00:58	E	97.4936	N	33.3774	1.5	184.5	4177.5	21	4.158	B
Crane No.4	2017-03-27 15:01:20	E	97.4947	N	33.3776	0	305.9	4160.5	21	4.23	B
Crane No.4	2017-03-27 16:01:07	E	97.4957	N	33.3776	0	307.7	4201.6	23	4.189	B
Crane No.4	2017-03-27 17:01:45	E	97.4923	N	33.3776	0	71.1	4186.7	24.24	4.188	C
Crane No.4	2017-03-27 18:00:39	E	97.4907	N	33.3764	0	74.6	4186.5	24.24	4.178	A
Crane No.4	2017-03-27 19:01:51	E	97.4908	N	33.3764	0	0	4166.5	25	4.158	C
Crane No.4	2017-03-27 20:00:41	E	97.4906	N	33.3764	0	255.4	4193.2	22	4.134	A
Crane No.4	2017-03-27 21:00:37	E	97.5155	N	33.3755	0	322.5	4174.1	22.24	4.121	A
Crane No.4	2017-03-27 22:00:35	E	97.5156	N	33.3755	0	91.5	4183.2	24.24	4.111	A
Crane No.4	2017-03-27 23:00:37	E	97.5155	N	33.3754	0	0	4171.3	24	4.101	A
Crane No.4	2017-03-28 00:00:35	E	97.5155	N	33.3754	0	134.2	4177.1	22.24	4.089	A
Crane No.4	2017-03-28 01:00:36	E	97.5155	N	33.3754	0	156.3	4186.8	20.24	4.083	A
Crane No.4	2017-03-28 02:00:28	E	97.5155	N	33.3753	0	175	4187.8	20.24	4.074	A
Crane No.4	2017-03-28 03:00:29	E	97.5155	N	33.3753	0	0	4187.3	21	4.06	A
Crane No.4	2017-03-28 04:00:39	E	97.5155	N	33.3754	0	179.6	4176.6	21	4.053	A
Crane No.4	2017-03-28 05:00:31	E	97.5155	N	33.3754	0	35.7	4172.1	20	4.044	A
Crane No.4	2017-03-28 06:00:50	E	97.5155	N	33.3753	0	88.5	4197.4	20	4.037	B
Crane No.4	2017-03-28 07:00:34	E	97.5155	N	33.3754	0	98.8	4180	20	4.029	A
Crane No.4	2017-03-28 08:00:34	E	97.5155	N	33.3753	0	133.3	4181.8	23.24	4.02	A
Crane No.4	2017-03-28 09:00:43	E	97.4923	N	33.3765	2.2	281.6	4193.7	21	4.019	A
Crane No.4	2017-03-28 10:04:23	E	97.4854	N	33.3733	3	232.3	4180.2	21.24	4.015	D
Crane No.4	2017-03-28 11:00:34	E	97.481	N	33.3727	0	312.7	4187.9	22	4.006	A
Crane No.4	2017-03-28 12:00:40	E	97.4845	N	33.3707	0	0	4195.4	21.24	4.007	A
Crane No.4	2017-03-28 13:01:38	E	97.4908	N	33.3765	0	238.3	4186.4	21.24	4.004	C
Crane No.4	2017-03-28 14:01:08	E	97.4954	N	33.3776	0	0	4156.4	25	4.005	B
Crane No.4	2017-03-28 15:00:42	E	97.4956	N	33.3776	0	288.4	4177.5	23	4.018	A
Crane No.4	2017-03-28 16:00:50	E	97.5105	N	33.3812	0	102.9	4180.7	21.24	4.025	B
Crane No.4	2017-03-28 17:00:35	E	97.5126	N	33.3809	0	121.2	4148.4	20.24	4.03	A
Crane No.4	2017-03-28 18:00:50	E	97.5129	N	33.3808	0	327.4	4170.8	22	4.01	B
Crane No.4	2017-03-28 19:00:46	E	97.5129	N	33.3809	0	4.2	4164.5	18.24	3.994	B
Crane No.4	2017-03-28 20:01:38	E	97.5104	N	33.3731	0	230.1	4170	21.24	3.986	C
Crane No.4	2017-03-28 21:00:40	E	97.5154	N	33.3755	0	311.3	4168.7	24.24	3.981	A
Crane No.4	2017-03-28 22:00:50	E	97.5155	N	33.3755	0	125	4169.2	20	3.977	B
Crane No.4	2017-03-28 23:00:35	E	97.5157	N	33.3753	0	36.3	4154.8	24.24	3.971	A
Crane No.4	2017-03-29 00:00:51	E	97.5154	N	33.3755	0	4.9	4185.7	24.24	3.965	B
Crane No.4	2017-03-29 01:00:33	E	97.5155	N	33.3755	0	38.2	4202.9	23	3.957	A
Crane No.4	2017-03-29 02:00:34	E	97.5155	N	33.3755	0	92.7	4180.8	23	3.952	A
Crane No.4	2017-03-29 03:00:35	E	97.5156	N	33.3754	0	72.3	4192	23.24	3.938	A
Crane No.4	2017-03-29 04:00:29	E	97.5155	N	33.3754	0	216.1	4179.4	25.24	3.937	A
Crane No.4	2017-03-29 05:00:34	E	97.5155	N	33.3754	0	53.9	4180.3	25	3.932	A
Crane No.4	2017-03-29 06:00:30	E	97.5155	N	33.3753	0	334.8	4178.4	25	3.926	A
Crane No.4	2017-03-29 07:00:31	E	97.5155	N	33.3755	0	217.4	4196.6	21.24	3.917	A
Crane No.4	2017-03-29 08:00:34	E	97.5155	N	33.3754	0	0	4176.3	23	3.91	A
Crane No.4	2017-03-29 09:00:40	E	97.5172	N	33.3822	1.8	86.8	4172	20.24	3.91	A
Crane No.4	2017-03-29 10:01:07	E	97.5229	N	33.3833	3.8	21.5	4148.2	22	3.913	B
Crane No.4	2017-03-29 11:02:56	E	97.5055	N	33.3989	45.7	272.1	4322.4	24.24	3.95	C
Crane No.4	2017-03-29 12:02:00	E	97.4229	N	33.7171	64.6	344.7	5500.5	11.24	4.033	C
Crane No.4	2017-03-29 13:04:37	E	97.4171	N	34.145	43.6	32.8	5483	11.24	4.043	D
Crane No.4	2017-03-29 14:06:41	Unknow	1000	Unknow	1000	0	0	0	14	4.048	Invalid
Crane No.4	2017-03-29 15:00:50	E	97.1728	N	34.3719	0	341.7	4789.8	11	3.994	B
Crane No.4	2017-03-29 16:00:50	E	97.1629	N	34.4551	0	143.8	4415.2	18.24	3.983	B
Crane No.4	2017-03-29 17:00:43	E	97.1628	N	34.4552	0	0	4426.5	22.24	3.971	A
Crane No.4	2017-03-29 18:00:38	E	97.1627	N	34.4552	0	77.8	4435.8	21.24	3.963	A
Crane No.4	2017-03-29 19:00:48	E	97.1236	N	34.4656	0	116.1	4415.3	20.24	3.953	B
Crane No.4	2017-03-29 20:00:35	E	97.1183	N	34.4505	0	249.1	4407.7	19.24	3.943	A
Crane No.4	2017-03-29 21:00:27	E	97.1207	N	34.459	0	255.3	4413.3	20	3.936	A
Crane No.4	2017-03-29 22:00:32	E	97.1207	N	34.459	0	201.1	4420.6	18.24	3.928	A
Crane No.4	2017-03-29 23:00:50	E	97.1207	N	34.4589	0	222.2	4412.9	23	3.924	B
Crane No.4	2017-03-30 00:01:30	E	97.1207	N	34.4588	0	173.3	4411.7	22	3.914	B
Crane No.4	2017-03-30 01:00:50	E	97.1207	N	34.4589	0	236.7	4417.8	22.24	3.902	B
Crane No.4	2017-03-30 02:00:33	E	97.1207	N	34.4589	0	154	4420.9	25.24	3.896	A
Crane No.4	2017-03-30 03:00:35	E	97.1207	N	34.4589	0	87.2	4414.8	24	3.886	A
Crane No.4	2017-03-30 04:00:35	E	97.1208	N	34.459	0	9.3	4411.6	22.24	3.88	A
Crane No.4	2017-03-30 05:00:36	E	97.1207	N	34.4589	0	322.9	4415.8	24	3.876	A
Crane No.4	2017-03-30 06:00:25	E	97.1207	N	34.4589	0	0	4411	22	3.871	A
Crane No.4	2017-03-30 07:00:50	E	97.1207	N	34.459	0	215.2	4410.3	21.24	3.866	B
Crane No.4	2017-03-30 08:00:34	E	97.1207	N	34.4589	0	303	4428.6	19.24	3.862	A
Crane No.4	2017-03-30 09:00:57	E	97.1207	N	34.4585	0	0	4420	24.24	3.866	B
Crane No.4	2017-03-30 10:00:39	E	97.1207	N	34.4586	0	0	4407.1	24.24	3.877	A
Crane No.4	2017-03-30 11:00:45	E	97.1185	N	34.6466	59.4	357.3	4778.8	10	4.057	A
Crane No.4	2017-03-30 12:01:17	E	97.0538	N	34.9737	38.6	307.4	4698.4	10	4.157	B
Crane No.4	2017-03-30 13:01:55	E	97.1446	N	35.3155	72.7	20.4	5545.8	14.24	4.212	C
Crane No.4	2017-03-30 14:05:40	E	97.2636	N	35.711	67.9	6.9	6002.5	13.24	4.229	D
Crane No.4	2017-03-30 15:01:07	E	97.3358	N	36.1987	76.5	2	3743.6	14	4.208	B
Crane No.4	2017-03-30 16:00:37	E	97.3217	N	36.2281	2	161.2	2792.4	20.24	4.082	A
Crane No.4	2017-03-30 17:01:20	E	97.3264	N	36.2323	0	49.9	2792	24	4.13	B
Crane No.4	2017-03-30 18:00:50	E	97.3253	N	36.2323	0	0	2794.7	22	4.174	B
Crane No.4	2017-03-30 19:04:48	E	97.5221	N	36.2817	43.3	339.8	2822.6	19.24	4.173	D
Crane No.4	2017-03-30 20:00:52	E	97.5197	N	36.284	0	0	2802.2	21	4.116	B
Crane No.4	2017-03-30 21:00:50	E	97.5163	N	36.2863	0	0	2814.5	25	4.1	B
Crane No.4	2017-03-30 22:00:34	E	97.5163	N	36.2863	0	0	2812	25	4.086	A
Crane No.4	2017-03-30 23:00:27	E	97.5164	N	36.2861	0	14.3	2808.7	25	4.074	A
Crane No.4	2017-03-31 00:00:34	E	97.5163	N	36.2862	0	7.7	2814.9	25	4.062	A
Crane No.4	2017-03-31 01:00:33	E	97.5164	N	36.2862	0	75.7	2819.6	16	4.042	A
Crane No.4	2017-03-31 02:00:30	E	97.5163	N	36.2862	0	257.8	2824	20	4.037	A
Crane No.4	2017-03-31 03:00:28	E	97.5164	N	36.2862	0	134.3	2813.5	23.24	4.017	A
Crane No.4	2017-03-31 04:00:35	E	97.5164	N	36.2862	0	84.6	2819.6	24	4.014	A
Crane No.4	2017-03-31 05:00:33	E	97.5163	N	36.2862	0	106.3	2814.1	17	4	A
Crane No.4	2017-03-31 06:00:39	E	97.5163	N	36.2862	0	139.7	2812.2	21	3.995	A
Crane No.4	2017-03-31 07:01:00	E	97.5164	N	36.2862	0	0	2812	18	3.985	B
Crane No.4	2017-03-31 08:00:38	E	97.637	N	36.4096	59.1	34.6	2914.7	13.24	3.982	A
Crane No.4	2017-03-31 09:00:53	E	97.943	N	36.6801	0	342.1	2971.6	16.24	3.987	B
Crane No.4	2017-03-31 10:01:20	E	97.9531	N	36.6796	0	0	2990.5	23	3.985	B
Crane No.4	2017-03-31 11:01:21	E	97.9546	N	36.6797	0	212	3007.4	24.24	3.991	B
Crane No.4	2017-03-31 12:00:47	E	97.9476	N	36.6805	0	0	3031.4	26.24	3.997	B
Crane No.4	2017-03-31 13:02:20	E	97.9468	N	36.68	1.7	73.7	2995.4	28.24	4.004	C
Crane No.4	2017-03-31 14:01:20	E	97.9522	N	36.6773	0	108.9	3011.1	29	4.004	B
Crane No.4	2017-03-31 15:00:50	E	97.9522	N	36.6775	0	270.7	2996.6	27	4.013	B
Crane No.4	2017-03-31 16:00:50	E	97.9515	N	36.6773	0	150.2	2962.4	24.24	4.01	B
Crane No.4	2017-03-31 17:00:34	E	97.9456	N	36.6801	0	319.2	2997.2	23	4.016	A
Crane No.4	2017-03-31 18:01:51	E	97.945	N	36.6799	0	112.9	2992.6	23	4.012	C
Crane No.4	2017-03-31 19:01:14	E	97.9456	N	36.6812	0	310.8	2997.2	21.24	3.999	B
Crane No.4	2017-03-31 20:00:35	E	97.9545	N	36.6797	0	0	3001.3	23.24	3.986	A
Crane No.4	2017-03-31 21:00:50	E	97.9545	N	36.6797	0	97	3004.7	20.24	3.98	B
Crane No.4	2017-03-31 22:00:30	E	97.9546	N	36.6797	0	283.1	3010.8	25	3.971	A
Crane No.4	2017-03-31 23:00:50	E	97.9546	N	36.6796	0	272.5	3004.2	25.24	3.965	B
Crane No.5	2016-04-08 00:00:40	E	94.4385	N	29.3821	0	0	2930.3	23	4.231	A
Crane No.5	2016-04-08 01:00:35	E	94.4384	N	29.3821	0	209.6	2930	21	4.216	A
Crane No.5	2016-04-08 02:00:53	E	94.4385	N	29.3822	0	0	2916.4	24.25	4.211	B
Crane No.5	2016-04-08 03:00:52	E	94.4387	N	29.3822	0	268.9	2918.5	21	4.204	B
Crane No.5	2016-04-08 04:00:51	E	94.4385	N	29.3823	0	273.4	2926.1	21	4.197	B
Crane No.5	2016-04-08 05:00:39	E	94.4387	N	29.3822	0	110.8	2906.5	20.25	4.188	A
Crane No.5	2016-04-08 06:00:35	E	94.4385	N	29.3822	0	110	2923.6	25.25	4.182	A
Crane No.5	2016-04-08 07:00:34	E	94.4385	N	29.3819	0	132.5	2922.4	25	4.176	A
Crane No.5	2016-04-08 08:00:35	E	94.4312	N	29.3646	1.5	158.2	2921.9	23.25	4.171	A
Crane No.5	2016-04-08 09:01:23	E	94.4304	N	29.3641	0	0	2934.2	22.25	4.171	B
Crane No.5	2016-04-08 10:01:45	E	94.4312	N	29.3638	0	154	2909	27.25	4.185	C
Crane No.5	2016-04-08 11:01:21	E	94.4518	N	29.4647	72.6	313.8	3262.3	18	4.243	B
Crane No.5	2016-04-08 12:00:34	E	94.3181	N	29.7177	67.6	308.4	3206.1	17.25	4.255	A
Crane No.5	2016-04-08 13:00:51	E	93.9517	N	29.804	78.8	281.8	4280.5	15	4.264	B
Crane No.5	2016-04-08 14:00:42	E	94.0072	N	30.1191	66.9	345	4383.1	15.25	4.264	A
Crane No.5	2016-04-08 14:15:05	E	94.0082	N	30.1236	0	80.1	3456.8	18	4.164	C
Crane No.5	2016-04-08 14:25:33	E	94.0129	N	30.108	1.8	77.8	3563.5	19.25	4.173	C
Crane No.5	2016-04-08 14:35:59	E	94.013	N	30.1082	0	105.4	3511.6	22.25	4.173	C
Crane No.5	2016-04-08 14:46:30	E	94.0132	N	30.1083	0	329.5	3500.5	23	4.179	C
Crane No.5	2016-04-08 14:57:01	E	94.0129	N	30.1086	0	345.1	3504.8	20.25	4.172	C
Crane No.5	2016-04-08 15:00:30	E	94.0129	N	30.1085	0	189.7	3504.9	20.25	4.212	A
Crane No.5	2016-04-08 16:01:09	E	94.0123	N	30.1079	2.4	168.2	3479.7	24.25	4.251	B
Crane No.5	2016-04-08 17:01:45	E	94.0129	N	30.1005	40	191.4	3499.6	23	4.247	C
Crane No.5	2016-04-08 18:00:35	E	94.0122	N	30.0943	0	78.2	3479.6	21.25	4.253	A
Crane No.5	2016-04-08 19:02:15	E	94.0139	N	30.0874	0	83.3	3499.7	17	4.235	C
Crane No.5	2016-04-08 20:00:51	E	94.0252	N	30.0832	0	152.1	3462.1	16	4.221	B
Crane No.5	2016-04-08 21:00:37	E	94.0007	N	30.1317	0	310.1	3483.5	20.25	4.212	A
Crane No.5	2016-04-08 22:00:51	E	94.0007	N	30.1317	0	335.7	3474.2	21	4.206	B
Crane No.5	2016-04-08 23:00:51	E	94.0007	N	30.1317	0	70.8	3472.3	24	4.198	B
Crane No.5	2016-04-09 00:00:30	E	94.0007	N	30.1316	0	7	3464.8	25	4.19	A
Crane No.5	2016-04-09 01:00:35	E	94.0007	N	30.1316	0	257.8	3476.4	23	4.175	A
Crane No.5	2016-04-09 02:00:51	E	94.0006	N	30.1317	0	283.1	3484.7	25.25	4.17	B
Crane No.5	2016-04-09 03:00:51	E	94.0008	N	30.1317	0	331.6	3483.1	21.25	4.164	B
Crane No.5	2016-04-09 04:00:34	E	94.0007	N	30.1317	0	312.8	3477.2	24.25	4.157	A
Crane No.5	2016-04-09 05:00:29	E	94.0006	N	30.1317	2.5	311.2	3449.7	24.25	4.151	A
Crane No.5	2016-04-09 06:00:51	E	94.0007	N	30.1317	0	294.6	3481.9	25	4.146	B
Crane No.5	2016-04-09 07:00:51	E	94.0008	N	30.1318	0	42.4	3501	22.25	4.139	B
Crane No.5	2016-04-09 08:01:45	E	94.0254	N	30.0545	0	104.5	3458.6	17	4.134	C
Crane No.5	2016-04-09 09:00:31	E	94.0231	N	30.053	0	0	3471.6	24.25	4.131	A
Crane No.5	2016-04-09 10:01:15	E	94.0255	N	30.0548	0	211.9	3479.4	22.25	4.14	B
Crane No.5	2016-04-09 11:01:09	E	94.0266	N	30.0525	0	133	3478.2	25.25	4.156	B
Crane No.5	2016-04-09 12:00:39	E	94.0141	N	30.107	0	204.3	3485.8	23.25	4.217	A
Crane No.5	2016-04-09 13:01:15	E	94.0144	N	30.1071	0	211.3	3450.8	27	4.254	B
Crane No.5	2016-04-09 14:00:51	E	94.0138	N	30.1071	0	159.1	3507.4	27	4.268	B
Crane No.5	2016-04-09 15:00:45	E	94.0065	N	30.1222	0	315.9	3506.5	24.25	4.277	A
Crane No.5	2016-04-09 16:00:51	E	94.0085	N	30.1198	0	341.4	3488.7	23	4.267	B
Crane No.5	2016-04-09 17:00:34	E	94.0088	N	30.1196	0	303.9	3462.1	24.25	4.277	A
Crane No.5	2016-04-09 18:00:42	E	94.0067	N	30.1221	0	21.6	3470.4	24	4.279	A
Crane No.5	2016-04-09 19:02:21	E	94.0068	N	30.1219	0	331	3524.7	25.24	4.271	C
Crane No.5	2016-04-09 20:00:41	E	94.0018	N	30.1315	0	173.5	3508.8	23.24	4.254	A
Crane No.5	2016-04-09 21:00:51	E	94.0007	N	30.1316	0	0	3485	23.24	4.244	B
Crane No.5	2016-04-09 22:00:35	E	94.0004	N	30.1319	0	68.2	3498.8	21	4.235	A
Crane No.5	2016-04-09 23:00:34	E	94.0003	N	30.1319	0	80.7	3463.7	25.24	4.227	A
Crane No.5	2016-04-10 00:00:40	E	94.0001	N	30.1319	0	200.5	3485.7	24	4.22	A
Crane No.5	2016-04-10 01:00:51	E	94.0004	N	30.1319	0	313.1	3564.8	22	4.203	B
Crane No.5	2016-04-10 02:00:27	E	94.0002	N	30.132	0	354.8	3462.9	25.25	4.198	A
Crane No.5	2016-04-10 03:01:09	E	94.0003	N	30.1319	0	57.5	3489.1	25	4.191	B
Crane No.5	2016-04-10 04:00:58	E	93.9945	N	30.1306	2.3	66.6	2947.6	25.25	4.184	B
Crane No.5	2016-04-10 05:00:51	E	94.0003	N	30.1319	0	92	3463.9	24.25	4.176	B
Crane No.5	2016-04-10 06:00:39	E	94.0003	N	30.1319	0	297	3485.8	25	4.17	A
Crane No.5	2016-04-10 07:00:51	E	93.9999	N	30.1318	0	280.7	3436.5	22.25	4.163	B
Crane No.5	2016-04-10 08:00:40	E	94.0125	N	30.0946	1.7	321	3462.9	14	4.156	A
Crane No.5	2016-04-10 09:03:21	Unknow	1000	Unknow	1000	0	0	0	24	4.153	Invalid
Crane No.5	2016-04-10 10:03:21	Unknow	1000	Unknow	1000	0	0	0	21	4.145	Invalid
Crane No.5	2016-04-10 11:01:51	E	94.0067	N	30.122	0	205.2	3495.4	21.24	4.206	C
Crane No.5	2016-04-10 12:00:36	E	94.0005	N	30.1351	0	246.9	3467.3	31	4.208	A
Crane No.5	2016-04-10 13:00:31	E	94.0122	N	30.1078	0	162.5	3459.7	23	4.257	A
Crane No.5	2016-04-10 14:00:54	E	94.0142	N	30.1073	0	306.8	3462.9	29.25	4.274	B
Crane No.5	2016-04-10 15:01:40	E	94.0143	N	30.107	0	29	3487.6	29	4.284	C
Crane No.5	2016-04-10 16:01:09	E	94.0137	N	30.1072	0	189.9	3442.9	27.25	4.29	B
Crane No.5	2016-04-10 17:00:40	E	94.01	N	30.128	1.6	74	3494.4	22	4.292	A
Crane No.5	2016-04-10 18:01:13	E	94.0078	N	30.1299	0	79.5	3506.2	20.25	4.291	B
Crane No.5	2016-04-10 19:00:52	E	94.0058	N	30.127	0	139.9	3450.7	25.25	4.287	B
Crane No.5	2016-04-10 20:01:16	E	93.9997	N	30.1366	0	142.1	3440	23	4.272	B
Crane No.5	2016-04-10 21:00:32	E	94.0001	N	30.1317	0	286.7	3490.7	23.25	4.259	A
Crane No.5	2016-04-10 22:00:35	E	94.0001	N	30.1318	0	286.5	3481.2	25	4.252	A
Crane No.5	2016-04-10 23:00:49	E	94.0001	N	30.1318	0	284	3445.2	25	4.243	B
Crane No.5	2016-04-11 00:00:42	E	94.0001	N	30.1317	1.8	335.5	3526.7	25	4.235	A
Crane No.5	2016-04-11 01:11:42	E	94.0001	N	30.1317	0	122.8	3495.4	20.25	4.216	C
Crane No.5	2016-04-11 02:00:51	E	94.0001	N	30.1317	0	0	3484.3	24	4.21	B
Crane No.5	2016-04-11 03:00:51	E	94.0001	N	30.1318	0	0	3475.4	24.25	4.204	B
Crane No.5	2016-04-11 04:00:23	E	94.0003	N	30.1318	7.5	97.7	3563	24	4.196	A
Crane No.5	2016-04-11 05:00:51	E	94.0001	N	30.1318	0	116.8	3492	22	4.189	B
Crane No.5	2016-04-11 06:00:34	E	94	N	30.1318	0	0	3491.4	23	4.183	A
Crane No.5	2016-04-11 07:00:51	E	94	N	30.132	0	355.5	3489.4	24	4.176	B
Crane No.5	2016-04-11 08:01:20	E	94.0141	N	30.1203	0	105.9	3462.1	18.25	4.17	B
Crane No.5	2016-04-11 09:01:55	E	94.0144	N	30.12	0	66.5	3483.5	20.25	4.17	C
Crane No.5	2016-04-11 10:02:09	E	94.0085	N	30.1196	0	104.9	3491.2	20	4.169	C
Crane No.5	2016-04-11 11:00:51	E	94.0088	N	30.1196	0	297.1	3495.1	25.25	4.192	B
Crane No.5	2016-04-11 12:01:19	E	93.9999	N	30.135	0	238.4	3477.5	29	4.225	B
Crane No.5	2016-04-11 13:00:25	E	93.9994	N	30.136	0	255.1	3408.7	27.25	4.261	A
Crane No.5	2016-04-11 14:00:36	E	94	N	30.1364	0	110.5	3493.4	20.25	4.275	A
Crane No.5	2016-04-11 15:00:36	E	94.0061	N	30.1271	0	272.9	3499.1	22	4.28	A
Crane No.5	2016-04-11 16:00:37	E	94.0073	N	30.1294	1.7	23.8	3400.1	24	4.273	A
Crane No.5	2016-04-11 17:00:54	E	94.0075	N	30.1294	0	236.7	3488.6	21	4.276	B
Crane No.5	2016-04-11 18:01:54	E	94.0041	N	30.1179	0	177.1	3489.3	21	4.273	C
Crane No.5	2016-04-11 19:00:46	E	94.014	N	30.1204	3.3	191.7	3470.3	21	4.263	B
Crane No.5	2016-04-11 20:00:20	E	94.0004	N	30.1336	0	0	3465.7	24	4.251	A
Crane No.5	2016-04-11 21:00:36	E	93.9999	N	30.1318	0	287.2	3474.5	24.24	4.242	A
Crane No.5	2016-04-11 22:00:21	E	94.0001	N	30.1318	10.2	352.4	3519.2	25	4.234	A
Crane No.5	2016-04-11 23:00:42	E	94.0001	N	30.1317	0	178	3491.3	21.24	4.227	A
Crane No.5	2016-04-12 00:00:36	E	94.0001	N	30.1317	1.8	153.8	3491	24.24	4.22	A
Crane No.5	2016-04-12 01:00:36	E	94.0001	N	30.1318	0	353.5	3511.2	20.25	4.207	A
Crane No.5	2016-04-12 02:00:36	E	94.0001	N	30.1317	0	93.8	3503.7	25	4.2	A
Crane No.5	2016-04-12 03:00:36	E	94.0001	N	30.1318	0	149.2	3467.2	24	4.194	A
Crane No.5	2016-04-12 04:00:13	E	94	N	30.1317	0	0	3481.6	24	4.187	A
Crane No.5	2016-04-12 05:00:36	E	94	N	30.1318	0	156.6	3478.5	24.25	4.182	A
Crane No.5	2016-04-12 06:00:16	E	94	N	30.1317	11.2	184.1	3483.2	24	4.173	A
Crane No.5	2016-04-12 07:00:22	E	94.0002	N	30.1319	8.6	65	3516	22.25	4.168	A
Crane No.5	2016-04-12 08:03:00	E	93.9996	N	30.1313	0	246.1	3497.6	25	4.159	C
Crane No.5	2016-04-12 09:01:39	E	94.0261	N	30.079	0	78	3469.2	24	4.159	C
Crane No.5	2016-04-12 10:01:41	E	94.0251	N	30.0824	0	316.9	3469	20.25	4.164	C
Crane No.5	2016-04-12 11:00:58	E	94.0144	N	30.1202	0	218.5	3507.4	22	4.173	B
Crane No.5	2016-04-12 12:00:36	E	94.0016	N	30.1292	2.3	75.7	3487.6	31	4.187	A
Crane No.5	2016-04-12 13:00:15	E	94.0001	N	30.1331	0	0	3468.5	28.25	4.219	A
Crane No.5	2016-04-12 14:00:36	E	94.0095	N	30.1279	1.6	333.8	3487.2	23	4.257	A
Crane No.5	2016-04-12 15:00:36	E	94.0085	N	30.1277	0	130.3	3518.9	25	4.263	A
Crane No.5	2016-04-12 16:00:36	E	94.0085	N	30.1278	0	274.9	3478.8	21	4.256	A
Crane No.5	2016-04-12 17:00:26	E	94.0087	N	30.1289	2	21	3423.5	21	4.269	A
Crane No.5	2016-04-12 18:00:25	E	94.009	N	30.1289	1.7	106.3	3522.1	22	4.274	A
Crane No.5	2016-04-12 19:00:54	E	94.0021	N	30.1291	0	153.4	3456.9	24	4.263	B
Crane No.5	2016-04-12 20:00:36	E	94.0008	N	30.1344	0	222.2	3481.1	23.25	4.249	A
Crane No.5	2016-04-12 21:00:19	E	94.0001	N	30.1319	0	148.1	3495.3	23	4.239	A
Crane No.5	2016-04-12 22:00:36	E	94.0001	N	30.1318	0	0	3363.4	21.25	4.231	A
Crane No.5	2016-04-12 23:00:37	E	94.0001	N	30.1318	0	135.7	3456.1	20	4.223	A
Crane No.5	2016-04-13 00:00:36	E	93.9999	N	30.1316	0	94.6	3552.9	21	4.216	A
Crane No.5	2016-04-13 01:00:21	E	94.0002	N	30.132	0	62.8	3544.8	25	4.2	A
Crane No.5	2016-04-13 02:00:34	E	93.9998	N	30.132	1.6	240.3	3441.2	25	4.194	A
Crane No.5	2016-04-13 03:00:36	E	94.0001	N	30.132	0	162.8	3475.5	25.25	4.188	A
Crane No.5	2016-04-13 04:00:19	E	94	N	30.1319	0	0	3450.8	25.25	4.181	A
Crane No.5	2016-04-13 05:00:36	E	94.0001	N	30.1318	0	230.1	3466.6	20	4.175	A
Crane No.5	2016-04-13 06:00:36	E	94.0001	N	30.1319	0	6.7	3509.4	25.25	4.169	A
Crane No.5	2016-04-13 07:00:35	E	94	N	30.1319	0	191.3	3494	24	4.162	A
Crane No.5	2016-04-13 08:01:25	E	94.0141	N	30.1197	2.1	52.2	3717.3	23.25	4.157	B
Crane No.5	2016-04-13 09:00:37	E	94.0027	N	30.1291	0	207.1	3511.8	24	4.153	A
Crane No.5	2016-04-13 10:00:41	E	94.0026	N	30.129	0	310.1	3466.5	23	4.153	A
Crane No.5	2016-04-13 11:00:36	E	94.0027	N	30.1293	0	206.2	3484.3	28	4.179	A
Crane No.5	2016-04-13 12:00:54	E	94.01	N	30.127	2.3	288.9	3458.6	26	4.237	B
Crane No.5	2016-04-13 13:00:36	E	94.012	N	30.1107	45.4	191.5	3448.2	21.25	4.265	A
Crane No.5	2016-04-13 14:00:36	E	94.0136	N	30.1073	0	148.4	3453.4	23.25	4.273	A
Crane No.5	2016-04-13 15:02:06	E	94.0131	N	30.1065	0	322.7	3486.9	21	4.28	C
Crane No.5	2016-04-13 16:00:36	E	94.0084	N	30.1272	0	73.9	3456.1	24.25	4.282	A
Crane No.5	2016-04-13 17:01:07	E	94.0088	N	30.1267	0	269.9	3449.4	23.25	4.288	B
Crane No.5	2016-04-13 18:00:19	E	94.0105	N	30.1277	2.1	333.8	3461.2	25	4.286	A
Crane No.5	2016-04-13 19:01:41	E	94.0085	N	30.1302	0	137.6	3499.4	24	4.283	C
Crane No.5	2016-04-13 20:00:14	E	94.0003	N	30.1327	0	264.6	3457.8	21.24	4.265	A
Crane No.5	2016-04-13 21:00:48	E	93.9999	N	30.1318	0	0	3493.4	23	4.256	B
Crane No.5	2016-04-13 22:00:35	E	93.9999	N	30.1316	1.5	338.5	3344.3	25	4.247	A
Crane No.5	2016-04-13 23:00:19	E	94	N	30.1318	0	335.9	3457.4	20	4.239	A
Crane No.5	2016-04-14 00:00:21	E	94.0002	N	30.1315	0	83.6	3534	23	4.232	A
Crane No.5	2016-04-14 01:00:36	E	94	N	30.1317	0	170.5	3497.1	20.25	4.218	A
Crane No.5	2016-04-14 02:00:28	E	94.0001	N	30.1317	0	0	3487.2	21	4.212	A
Crane No.5	2016-04-14 03:00:36	E	94.0001	N	30.1318	0	230.6	3476	25.25	4.206	A
Crane No.5	2016-04-14 04:00:21	E	94.0002	N	30.1318	0	274.3	3516	20	4.199	A
Crane No.5	2016-04-14 05:00:36	E	94.0002	N	30.1318	0	0	3479.2	25.25	4.193	A
Crane No.5	2016-04-14 06:00:28	E	94.0001	N	30.1321	0	359	3452.1	25	4.186	A
Crane No.5	2016-04-14 07:00:42	E	93.9997	N	30.1317	0	165.9	3397.6	23.25	4.18	A
Crane No.5	2016-04-14 08:00:59	E	94.0054	N	30.1344	0	0	184	25	4.174	B
Crane No.5	2016-04-14 09:02:19	E	94.0154	N	30.1428	0	8.9	185	25	4.18	C
Crane No.5	2016-04-14 10:01:30	E	94.008	N	30.1294	0	38.2	3451	21	4.191	B
Crane No.5	2016-04-14 11:00:36	E	94.0078	N	30.1302	0	0	3387.3	22.25	4.214	A
Crane No.5	2016-04-14 12:00:21	E	94.001	N	30.1362	0	113.9	3385.3	22.25	4.254	A
Crane No.5	2016-04-14 13:05:03	E	94.0014	N	30.1342	3.8	344.7	3457.9	21.25	4.261	D
Crane No.5	2016-04-14 14:00:21	E	94.0024	N	30.1345	0	334.8	3487	15.25	4.25	A
Crane No.5	2016-04-14 15:01:06	E	94.0081	N	30.1291	0	0.6	3486	23.25	4.252	B
Crane No.5	2016-04-14 16:00:43	E	93.9913	N	30.1036	4.8	50.1	186.4	24.25	4.264	A
Crane No.5	2016-04-14 17:02:32	E	94.0002	N	30.1327	2.3	344.5	3475.1	21.25	4.252	C
Crane No.5	2016-04-14 18:00:23	E	94.0001	N	30.1333	1.6	212	3508.5	18	4.232	A
Crane No.5	2016-04-14 19:01:30	E	94.0007	N	30.1347	3	340	3522.2	20	4.224	B
Crane No.5	2016-04-14 20:00:36	E	94.0005	N	30.1336	0	286.5	3472	16.24	4.212	A
Crane No.5	2016-04-14 21:00:26	E	93.9999	N	30.1319	1.6	322.3	3478.9	20.24	4.206	A
Crane No.5	2016-04-14 22:00:45	E	94.0002	N	30.1318	0	279.4	3488.3	18	4.199	A
Crane No.5	2016-04-14 23:01:40	E	94.0002	N	30.1319	0	103.4	3481.4	19.25	4.192	C
Crane No.5	2016-04-15 00:00:34	E	94.0002	N	30.1319	0	208.9	3485.2	19	4.183	A
Crane No.5	2016-04-15 01:00:18	E	94.0002	N	30.1319	0	288	3505.2	22.25	4.168	A
Crane No.5	2016-04-15 02:00:36	E	94.0003	N	30.1319	0	132.8	3471.1	23	4.164	A
Crane No.5	2016-04-15 03:00:19	E	94.0003	N	30.1318	2.9	166.9	3478.9	23.25	4.158	A
Crane No.5	2016-04-15 04:00:36	E	94.0003	N	30.1319	0	0	3460.5	25	4.153	A
Crane No.5	2016-04-15 05:00:36	E	94.0003	N	30.132	0	112.9	3485.6	24	4.147	A
Crane No.5	2016-04-15 06:00:20	E	94.0003	N	30.1321	0	313.8	3427.8	23.25	4.141	A
Crane No.5	2016-04-15 07:00:50	E	94.0003	N	30.1319	0	109.9	3481.2	23.25	4.136	B
Crane No.5	2016-04-15 08:00:37	E	93.9836	N	30.2014	0	352.5	3488.8	18	4.13	A
Crane No.5	2016-04-15 09:00:35	E	93.9827	N	30.2001	2.2	69.2	3503.9	20.25	4.133	A
Crane No.5	2016-04-15 10:00:25	E	93.9734	N	30.2044	0	225.1	3498.8	24.25	4.145	A
Crane No.5	2016-04-15 11:00:36	E	93.973	N	30.2043	0	205.7	3493.6	31.25	4.175	A
Crane No.5	2016-04-15 12:02:06	E	93.9634	N	30.232	72.8	326.2	5085.9	12.25	4.237	C
Crane No.5	2016-04-15 13:00:19	E	94.0557	N	30.5332	31.5	339.8	5971.7	8	4.246	A
Crane No.5	2016-04-15 14:01:12	E	94.6781	N	31.0171	82.4	45.1	5503.9	7	4.249	B
Crane No.5	2016-04-15 15:01:08	E	95.3617	N	31.3483	95.6	53.4	5609.6	10	4.254	B
Crane No.5	2016-04-15 16:01:06	E	95.6778	N	31.6034	0	181.5	4607.5	19	4.224	B
Crane No.5	2016-04-15 17:00:19	E	95.6738	N	31.6019	0	137	4618.5	18	4.229	A
Crane No.5	2016-04-15 18:00:36	E	95.6736	N	31.6019	0	140.6	4614.4	18.24	4.242	A
Crane No.5	2016-04-15 19:00:34	E	95.6782	N	31.6056	0	87.9	4607.5	23.24	4.229	A
Crane No.5	2016-04-15 20:00:19	E	95.6783	N	31.6056	0	161.4	4589	21	4.218	A
Crane No.5	2016-04-15 21:00:36	E	95.6783	N	31.6057	0	7.9	4589.6	22.24	4.211	A
Crane No.5	2016-04-15 22:00:10	E	95.6784	N	31.6056	2.4	72.1	4607.3	23.24	4.203	A
Crane No.5	2016-04-15 23:00:36	E	95.6783	N	31.6056	0	280.6	4594.6	23.24	4.198	A
Crane No.5	2016-04-16 00:00:30	E	95.6782	N	31.6055	5.9	10	4614.9	23.24	4.191	A
Crane No.5	2016-04-16 01:00:19	E	95.6783	N	31.6055	0	87.2	4618.3	24.24	4.183	A
Crane No.5	2016-04-16 02:00:24	E	95.6782	N	31.6057	2	342.2	4551.8	24	4.179	A
Crane No.5	2016-04-16 03:00:38	E	95.6783	N	31.6055	0	0	4602.6	23	4.173	A
Crane No.5	2016-04-16 04:00:35	E	95.6783	N	31.6055	0	15.6	4603.7	23	4.167	A
Crane No.5	2016-04-16 05:00:14	E	95.6783	N	31.6056	0	157.6	4589.9	23	4.162	A
Crane No.5	2016-04-16 06:00:08	E	95.6783	N	31.6057	0	278.6	4586.3	22	4.158	A
Crane No.5	2016-04-16 07:00:36	E	95.6783	N	31.6055	1.8	209.6	4595.9	21.24	4.153	A
Crane No.5	2016-04-16 08:00:18	E	95.6783	N	31.6055	1.6	119.1	4598.4	20.24	4.155	A
Crane No.5	2016-04-16 09:00:16	E	95.6779	N	31.6054	0	0	4597.4	21.24	4.155	A
Crane No.5	2016-04-16 10:00:36	E	95.678	N	31.6056	0	169.7	4592.2	21.24	4.165	A
Crane No.5	2016-04-16 11:00:48	E	95.7049	N	31.756	47.3	3.6	5713.9	11.24	4.241	B
Crane No.5	2016-04-16 12:00:38	E	95.8683	N	32.1863	62.5	85.3	5719.4	13.25	4.248	A
Crane No.5	2016-04-16 13:01:06	E	96.2265	N	32.6109	88.8	14.1	5976.6	8	4.254	B
Crane No.5	2016-04-16 14:00:47	E	96.6545	N	33.0895	105.8	44.9	5625.4	9.25	4.256	B
Crane No.5	2016-04-16 15:00:40	E	97.266	N	33.4844	87.1	26.9	6411.9	5.25	4.256	A
Crane No.5	2016-04-16 16:01:54	E	97.895	N	33.9907	55	55.6	5130.4	8.24	4.255	C
Crane No.5	2016-04-16 17:01:11	E	98.4515	N	34.2542	31.2	16.7	4661	8.24	4.253	B
Crane No.5	2016-04-16 18:00:36	E	98.7054	N	34.2016	0	227.8	4246.7	20	4.212	A
Crane No.5	2016-04-16 19:00:32	E	98.7054	N	34.2014	1.9	180.8	4246.1	17	4.205	A
Crane No.5	2016-04-16 20:00:19	E	98.7053	N	34.2015	0	207.1	4240.5	18.24	4.194	A
Crane No.5	2016-04-16 21:00:36	E	98.7044	N	34.2011	0	0	4240.2	19.24	4.188	A
Crane No.5	2016-04-16 22:00:37	E	98.7045	N	34.2014	7.4	1.2	4251.1	20	4.181	A
Crane No.5	2016-04-16 23:00:20	E	98.7045	N	34.2009	0	250.1	4250.4	20	4.175	A
Crane No.5	2016-04-17 00:00:43	E	98.7045	N	34.2008	1.6	167.3	4233.4	21.24	4.17	A
Crane No.5	2016-04-17 01:00:42	E	98.7044	N	34.201	0	331.3	4207.2	21	4.161	A
Crane No.5	2016-04-17 02:00:36	E	98.7046	N	34.201	0	61.6	4239.2	20.24	4.156	A
Crane No.5	2016-04-17 03:00:17	E	98.7045	N	34.2011	0	44	4248.6	20	4.15	A
Crane No.5	2016-04-17 04:00:36	E	98.7045	N	34.201	0	79.8	4248.1	19.24	4.146	A
Crane No.5	2016-04-17 05:00:09	E	98.7045	N	34.2011	0	301.8	4235.6	21	4.14	A
Crane No.5	2016-04-17 06:00:22	E	98.7045	N	34.201	0	0	4244.9	21.24	4.136	A
Crane No.5	2016-04-17 07:00:36	E	98.7046	N	34.2009	0	0	4236.8	20.24	4.131	A
Crane No.5	2016-04-17 08:00:20	E	98.7046	N	34.201	1.9	65.9	4247.2	22	4.129	A
Crane No.5	2016-04-17 09:00:22	E	98.7047	N	34.2012	0	103.3	4203.3	20.24	4.136	A
Crane No.5	2016-04-17 10:00:54	E	98.7044	N	34.2011	0	354.3	4235.6	20	4.18	B
Crane No.5	2016-04-17 11:00:22	E	98.7424	N	34.4941	18.5	347.7	4304	12.24	4.233	A
Crane No.5	2016-04-17 12:00:36	E	98.8185	N	34.8334	50.2	352.6	5550.6	8	4.248	A
Crane No.5	2016-04-17 13:00:32	E	98.777	N	35.238	40.9	336.9	4225.9	15	4.248	A
Crane No.5	2016-04-17 14:01:08	E	98.8056	N	35.3456	29.6	331.1	7495.3	10.24	4.258	B
Crane No.5	2016-04-17 15:00:53	E	99.021	N	35.7736	55.8	21.9	4929.8	10	4.247	B
Crane No.5	2016-04-17 16:00:54	E	99.3362	N	36.2022	49.7	22.6	5637.6	5.25	4.25	B
Crane No.5	2016-04-17 17:00:38	E	99.3461	N	36.5707	25.4	315.6	3191.1	14.25	4.235	A
Crane No.5	2016-04-17 18:00:36	E	99.2837	N	36.5817	0	51.8	3105.4	19.25	4.252	A
Crane No.5	2016-04-17 19:00:36	E	99.2835	N	36.5814	0	0	3073.8	17.25	4.259	A
Crane No.5	2016-04-17 20:00:20	E	99.2831	N	36.5812	8.6	167.2	3087.7	18	4.246	A
Crane No.5	2016-04-17 21:00:36	E	99.2843	N	36.5882	0	325.3	3072.9	21.25	4.233	A
Crane No.5	2016-04-17 22:00:21	E	99.2849	N	36.5878	0	47.5	3206.6	19	4.222	A
Crane No.5	2016-04-17 23:00:27	E	99.2844	N	36.5876	0	94.4	3066.9	21	4.213	A
Crane No.5	2016-09-26 00:00:23	E	99.6566	N	36.967	0	111.5	3162.1	20.24	4.281	A
Crane No.5	2016-09-26 01:00:36	E	99.6567	N	36.9668	0	264	3177.4	21	4.269	A
Crane No.5	2016-09-26 02:00:17	E	99.6567	N	36.9668	0	89.4	3188.1	25.24	4.266	A
Crane No.5	2016-09-26 03:00:40	E	99.6567	N	36.9668	0	281	3200.5	22	4.264	A
Crane No.5	2016-09-26 04:00:29	E	99.6566	N	36.9668	2.1	235.9	3176.6	21.24	4.26	A
Crane No.5	2016-09-26 05:00:48	E	99.6567	N	36.9668	1.6	167.8	3196.8	21.24	4.257	B
Crane No.5	2016-09-26 06:00:36	E	99.6566	N	36.9669	0	301.7	3190.4	21.24	4.252	A
Crane No.5	2016-09-26 07:00:39	E	99.6466	N	36.9661	0	277.6	3186.8	22.24	4.248	A
Crane No.5	2016-09-26 08:00:36	E	99.646	N	36.9662	0	76.4	3202.9	25	4.247	A
Crane No.5	2016-09-26 09:01:28	E	99.6433	N	36.9755	0	332.4	3213.3	21	4.253	B
Crane No.5	2016-09-26 10:04:02	E	99.643	N	36.9762	0	88.1	3207.5	25.24	4.268	D
Crane No.5	2016-09-26 11:00:17	E	99.6207	N	36.9642	53.6	72.7	3225.3	24.24	4.282	A
Crane No.5	2016-09-26 12:01:36	E	99.4981	N	36.9594	1.8	86.6	3528.5	24	4.29	C
Crane No.5	2016-09-26 13:00:20	E	99.2608	N	36.8462	21.2	270.2	4948.5	15	4.294	A
Crane No.5	2016-09-26 14:00:36	E	99.2906	N	36.5688	2.2	195.1	3075.8	25	4.292	A
Crane No.5	2016-09-26 15:00:36	E	99.2905	N	36.5688	0	126.5	3084.4	26	4.296	A
Crane No.5	2016-09-26 16:00:36	E	99.2913	N	36.5691	0	12.2	3087	24.24	4.302	A
Crane No.5	2016-09-26 17:00:45	E	99.2906	N	36.569	0	112.7	3093.8	21.24	4.305	A
Crane No.5	2016-09-26 18:00:20	E	99.2901	N	36.5687	0	166.8	3083.8	25.24	4.306	A
Crane No.5	2016-09-26 19:00:36	E	99.2904	N	36.5689	0	184.8	3074.9	25.24	4.3	A
Crane No.5	2016-09-26 20:00:24	E	99.244	N	36.6071	0	253.1	3070.8	24.24	4.293	A
Crane No.5	2016-09-26 21:00:30	E	99.2444	N	36.6067	0	166.6	3085.2	22.24	4.288	A
Crane No.5	2016-09-26 22:00:36	E	99.2445	N	36.607	1.7	183.7	3065.3	22.24	4.284	A
Crane No.5	2016-09-26 23:00:19	E	99.2445	N	36.607	3	212.3	3065.7	22.24	4.279	A
Crane No.5	2016-09-27 00:00:19	E	99.2444	N	36.607	0	47.2	3081.7	21	4.276	A
Crane No.5	2016-09-27 01:00:36	E	99.2444	N	36.607	0	0	3066.7	23.24	4.263	A
Crane No.5	2016-09-27 02:00:18	E	99.2444	N	36.6071	1.5	121.7	3047.1	22	4.261	A
Crane No.5	2016-09-27 03:00:19	E	99.2444	N	36.6069	0	38.6	3090	21	4.258	A
Crane No.5	2016-09-27 04:00:36	E	99.2442	N	36.607	0	31.8	3066.1	23	4.255	A
Crane No.5	2016-09-27 05:00:17	E	99.2443	N	36.607	0	71.2	3054.3	22	4.251	A
Crane No.5	2016-09-27 06:00:36	E	99.2444	N	36.6069	0	162.2	3085.2	23	4.248	A
Crane No.5	2016-09-27 07:00:26	E	99.2905	N	36.5689	2	111.7	3086.1	20	4.244	A
Crane No.5	2016-09-27 08:00:36	E	99.2902	N	36.5689	0	184.3	3090.2	25	4.243	A
Crane No.5	2016-09-27 09:00:23	E	99.2912	N	36.5669	2.6	153.1	3047.3	24.24	4.264	A
Crane No.5	2016-09-27 10:00:44	E	99.2849	N	36.5732	0	219.7	3082.4	25	4.268	A
Crane No.5	2016-09-27 11:00:36	E	99.2849	N	36.5733	0	0	3080	20.24	4.283	A
Crane No.5	2016-09-27 12:00:37	E	99.2908	N	36.5669	0	354	3093.6	20.24	4.289	A
Crane No.5	2016-09-27 13:00:42	E	99.2909	N	36.5669	0	347.6	3103	23	4.294	A
Crane No.5	2016-09-27 14:00:36	E	99.2913	N	36.5686	0	54.4	3112.8	26	4.299	A
Crane No.5	2016-09-27 15:00:37	E	99.2899	N	36.5694	0	0	3090.6	23	4.303	A
Crane No.5	2016-09-27 16:00:22	E	99.2887	N	36.5649	2.1	160.2	3877.4	23.24	4.305	A
Crane No.5	2016-09-27 17:00:41	E	99.2901	N	36.5692	0	168.3	3078	24	4.308	A
Crane No.5	2016-09-27 18:00:38	E	99.2891	N	36.5694	0	0	3087.1	21	4.309	A
Crane No.5	2016-09-27 19:01:37	E	99.2895	N	36.5693	0	0	3098	20	4.304	C
Crane No.5	2016-09-27 20:00:27	E	99.2958	N	36.5725	0	107.4	3082.6	24.24	4.296	A
Crane No.5	2016-09-27 21:00:22	E	99.2958	N	36.5723	2.5	197.3	3092.5	22.24	4.289	A
Crane No.5	2016-09-27 22:00:41	E	99.2959	N	36.5724	2.3	81.5	3088.5	23	4.285	A
Crane No.5	2016-09-27 23:00:19	E	99.2959	N	36.5724	2	66.8	3000.6	22	4.28	A
Crane No.5	2016-09-28 00:00:36	E	99.296	N	36.5725	0	0	3077	21	4.276	A
Crane No.5	2016-09-28 01:00:19	E	99.2959	N	36.5725	0	65.8	3066.2	25.24	4.261	A
Crane No.5	2016-09-28 02:00:36	E	99.2959	N	36.5725	0	78.1	3074.2	21.24	4.26	A
Crane No.5	2016-09-28 03:00:16	E	99.2958	N	36.5725	0	310.7	3067.3	20.24	4.257	A
Crane No.5	2016-09-28 04:00:20	E	99.2959	N	36.5725	3.1	109.7	3068.4	21.24	4.255	A
Crane No.5	2016-09-28 05:00:36	E	99.2959	N	36.5724	0	312.6	3051.6	21.24	4.252	A
Crane No.5	2016-09-28 06:00:20	E	99.2961	N	36.5723	0	25.1	3075.1	20.24	4.248	A
Crane No.5	2016-09-28 07:00:36	E	99.2957	N	36.5723	0	0	3091	25	4.246	A
Crane No.5	2016-09-28 08:00:24	E	99.2878	N	36.5683	0	292.4	3072.8	24	4.244	A
Crane No.5	2016-09-28 09:00:36	E	99.2882	N	36.5681	1.7	39.2	3077.9	23.24	4.245	A
Crane No.5	2016-09-28 10:00:36	E	99.2881	N	36.5679	0	0	3096.9	24.24	4.255	A
Crane No.5	2016-09-28 11:00:37	E	99.2824	N	36.5738	0	132.9	3071.5	25.24	4.267	A
Crane No.5	2016-09-28 12:00:23	E	99.2905	N	36.5688	4.2	69.1	3085.4	27.24	4.281	A
Crane No.5	2016-09-28 13:00:55	E	99.29	N	36.5693	2.7	152.7	3062.4	31	4.294	B
Crane No.5	2016-09-28 14:00:39	E	99.2899	N	36.5692	0	226.5	3096.6	31.24	4.302	A
Crane No.5	2016-09-28 15:00:36	E	99.2911	N	36.5683	0	303.6	3085.9	30	4.306	A
Crane No.5	2016-09-28 16:00:19	E	99.2916	N	36.5676	0	86.1	3093.3	28.24	4.312	A
Crane No.5	2016-09-28 17:01:25	E	99.2909	N	36.5668	0	0	3076.2	30.24	4.313	B
Crane No.5	2016-09-28 18:00:45	E	99.2906	N	36.5685	2.2	181.3	3061.1	24	4.313	A
Crane No.5	2016-09-28 19:00:37	E	99.2907	N	36.5696	100.4	358.3	3081.6	20	4.305	A
Crane No.5	2016-09-28 20:00:19	E	99.2446	N	36.6066	0	233.9	3063.2	25.24	4.299	A
Crane No.5	2016-09-28 21:00:37	E	99.2443	N	36.6069	0	21.7	3064.9	22.24	4.294	A
Crane No.5	2016-09-28 22:00:23	E	99.2445	N	36.607	5.2	80.1	3049.5	23.24	4.29	A
Crane No.5	2016-09-28 23:00:36	E	99.2443	N	36.607	0	0	3076.6	23	4.286	A
Crane No.5	2016-09-29 00:00:19	E	99.2444	N	36.6071	0	352.2	3073.6	21.24	4.282	A
Crane No.5	2016-09-29 01:00:28	E	99.2443	N	36.607	0	163.6	3091.8	23	4.269	A
Crane No.5	2016-09-29 02:00:37	E	99.2443	N	36.6069	0	181.1	3070.8	22.24	4.267	A
Crane No.5	2016-09-29 03:00:37	E	99.2443	N	36.6069	0	260.3	3063.8	23.24	4.263	A
Crane No.5	2016-09-29 04:00:26	E	99.2445	N	36.6071	1.8	33.2	3062.3	23	4.259	A
Crane No.5	2016-09-29 05:00:36	E	99.2443	N	36.6069	0	0	3068	22	4.257	A
Crane No.5	2016-09-29 06:00:18	E	99.2444	N	36.607	0	4.1	3074.9	22.24	4.253	A
Crane No.5	2016-09-29 07:00:18	E	99.29	N	36.569	0	0	3084.8	15.24	4.25	A
Crane No.5	2016-09-29 08:00:36	E	99.2903	N	36.569	0	157	3082.1	25.24	4.249	A
Crane No.5	2016-09-29 09:00:23	E	99.2906	N	36.5691	0	285.1	3078.1	20.24	4.252	A
Crane No.5	2016-09-29 10:00:37	E	99.2913	N	36.569	0	0	3083.3	26	4.261	A
Crane No.5	2016-09-29 11:00:37	E	99.2912	N	36.5684	0	359.8	3107	26.24	4.272	A
Crane No.5	2016-09-29 12:00:22	E	99.2913	N	36.5684	0	0	3079.6	28	4.284	A
Crane No.5	2016-09-29 13:00:38	E	99.2909	N	36.5684	0	119.8	3103.9	26	4.294	A
Crane No.5	2016-09-29 14:00:38	E	99.2906	N	36.5682	0	202.3	3041.2	25	4.298	A
Crane No.5	2016-09-29 15:00:51	E	99.2904	N	36.5687	0	0	3072.1	28	4.303	B
Crane No.5	2016-09-29 16:00:36	E	99.2908	N	36.5688	0	191.9	3101.4	21.24	4.307	A
Crane No.5	2016-09-29 17:00:36	E	99.2906	N	36.5686	0	152.2	3086.3	21.24	4.309	A
Crane No.5	2016-09-29 18:00:40	E	99.2884	N	36.568	1.5	71.4	3102.9	22.24	4.31	A
Crane No.5	2016-09-29 19:01:06	E	99.2878	N	36.5683	0	101.8	3089.5	20.24	4.305	B
Crane No.5	2016-09-29 20:00:22	E	99.2446	N	36.6068	7.8	180.6	3088.5	25.24	4.296	A
Crane No.5	2016-09-29 21:00:36	E	99.2446	N	36.6071	2	292	3071.1	23	4.292	A
Crane No.5	2016-09-29 22:01:09	E	99.2432	N	36.6073	0	354.2	2910	22	4.287	B
Crane No.5	2016-09-29 23:00:20	E	99.2447	N	36.6071	2.8	96.2	3059.3	20.24	4.281	A
Crane No.5	2016-09-30 00:00:36	E	99.2446	N	36.6071	0	226.1	3068.4	21.24	4.278	A
Crane No.5	2016-09-30 01:00:36	E	99.2446	N	36.6072	2.4	263.6	3073.6	21.24	4.263	A
Crane No.5	2016-09-30 02:00:22	E	99.2447	N	36.6072	3.8	95.9	3070.5	21	4.261	A
Crane No.5	2016-09-30 03:00:36	E	99.2446	N	36.6071	0	317.6	3061.2	20.24	4.258	A
Crane No.5	2016-09-30 04:01:06	E	99.2449	N	36.607	0	235.3	3090.8	20.24	4.255	B
Crane No.5	2016-09-30 05:00:54	E	99.2446	N	36.6071	1.9	110.2	3066.1	25.24	4.249	B
Crane No.5	2016-09-30 06:00:36	E	99.2444	N	36.6071	0	242.3	3084.4	21	4.245	A
Crane No.5	2016-09-30 07:00:20	E	99.2743	N	36.5877	57	134.1	3111.1	19	4.242	A
Crane No.5	2016-09-30 08:00:22	E	99.2914	N	36.5687	0	122.9	3107.9	24.24	4.241	A
Crane No.5	2016-09-30 09:00:36	E	99.2869	N	36.5697	0	83	3071.2	21.24	4.246	A
Crane No.5	2016-09-30 10:01:05	E	99.286	N	36.573	0	0	3075.3	23	4.251	B
Crane No.5	2016-09-30 11:01:06	E	99.2859	N	36.5731	0	235.2	3084	23.24	4.258	B
Crane No.5	2016-09-30 12:00:36	E	99.286	N	36.5729	0	295.5	3079.2	22.24	4.263	A
Crane No.5	2016-09-30 13:01:00	E	99.2861	N	36.5731	0	256	3077.7	23	4.272	B
Crane No.5	2016-09-30 14:01:06	E	99.2847	N	36.5733	0	0.9	3088.6	27	4.283	B
Crane No.5	2016-09-30 15:01:02	E	99.2839	N	36.5735	0	0	3108.1	27.24	4.293	B
Crane No.5	2016-09-30 16:00:36	E	99.285	N	36.5714	0	258.3	3084.1	24.24	4.295	A
Crane No.5	2016-09-30 17:01:11	E	99.2868	N	36.5697	2	81.2	3083.2	24	4.301	B
Crane No.5	2016-09-30 18:00:36	E	99.2866	N	36.5704	0	208.8	3058.5	21.24	4.301	A
Crane No.5	2016-09-30 19:00:36	E	99.286	N	36.5729	0	325.4	3086.2	24.24	4.294	A
Crane No.5	2016-09-30 20:00:20	E	99.296	N	36.5724	3.2	181.6	3107.5	24.24	4.288	A
Crane No.5	2016-09-30 21:00:21	E	99.2958	N	36.5724	0	202.3	3067.6	21.24	4.283	A
Crane No.5	2016-09-30 22:01:06	E	99.296	N	36.5724	2	49.2	3064.6	22	4.28	B
Crane No.5	2016-09-30 23:00:36	E	99.296	N	36.5722	0	242.3	3099	21.24	4.273	A
Crane No.5	2016-10-01 00:00:36	E	99.2959	N	36.5725	0	309.9	3070.1	21.24	4.269	A
Crane No.5	2016-10-01 01:00:17	E	99.296	N	36.5723	0	95.4	3079.5	21.24	4.255	A
Crane No.5	2016-10-01 02:00:20	E	99.2959	N	36.5725	0	247.9	3069.4	21	4.255	A
Crane No.5	2016-10-01 03:00:36	E	99.2959	N	36.5724	2	8.7	3069.5	22.24	4.252	A
Crane No.5	2016-10-01 04:00:19	E	99.2958	N	36.5724	1.8	313.6	3063.3	21.24	4.249	A
Crane No.5	2016-10-01 05:00:36	E	99.2952	N	36.5733	0	11.9	3073.3	20.24	4.246	A
Crane No.5	2016-10-01 06:00:19	E	99.2953	N	36.5733	0	41.6	3071.8	21	4.242	A
Crane No.5	2016-10-01 07:00:17	E	99.2953	N	36.5731	0	0	3073.1	23	4.24	A
Crane No.5	2016-10-01 08:00:29	E	99.2853	N	36.5718	1.5	304.5	3069.9	24	4.239	A
Crane No.5	2016-10-01 09:00:36	E	99.286	N	36.5702	1.9	314.9	3068.6	21.24	4.246	A
Crane No.5	2016-10-01 10:01:42	E	99.2876	N	36.568	0	335.1	3094	24.24	4.259	C
Crane No.5	2016-10-01 11:00:36	E	99.2882	N	36.5681	0	91.8	3080.5	27.24	4.276	A
Crane No.5	2016-10-01 12:00:32	E	99.2878	N	36.5681	0	39.7	3049.9	29.24	4.289	A
Crane No.5	2016-10-01 13:00:33	E	99.285	N	36.5699	0	327.3	3088.5	31.24	4.297	A
Crane No.5	2016-10-01 14:01:01	E	99.2861	N	36.574	0	0	3109.7	30.24	4.303	B
Crane No.5	2016-10-01 15:00:20	E	99.2868	N	36.5726	0	66.2	3120.3	31	4.307	A
Crane No.5	2016-10-01 16:01:01	E	99.2858	N	36.5727	3.2	255.7	3090.7	28	4.312	B
Crane No.5	2016-10-01 17:00:36	E	99.2866	N	36.5718	0	90.6	3087.3	25	4.312	A
Crane No.5	2016-10-01 18:00:50	E	99.2858	N	36.571	0	284	3070.7	24.24	4.313	B
Crane No.5	2016-10-01 19:00:35	E	99.286	N	36.5707	0	103.1	3090.7	20.24	4.308	A
Crane No.5	2016-10-01 20:00:20	E	99.2437	N	36.6076	0	0	3067.4	24	4.301	A
Crane No.5	2016-10-01 21:00:19	E	99.2438	N	36.6075	0	175.2	3063.7	24.24	4.297	A
Crane No.5	2016-10-01 22:00:36	E	99.2445	N	36.6071	0	328.9	3063	20	4.293	A
Crane No.5	2016-10-01 23:00:19	E	99.2444	N	36.6071	2.6	346.9	3040.9	23	4.288	A
Crane No.5	2016-10-02 00:00:11	E	99.2443	N	36.6069	2	292.2	3061.3	20.24	4.285	A
Crane No.5	2016-10-02 01:03:40	E	99.2361	N	36.6008	1.8	191.8	197.7	23	4.271	D
Crane No.5	2016-10-02 02:00:37	E	99.2443	N	36.6071	0	355.7	3047.7	21	4.259	A
Crane No.5	2016-10-02 03:00:22	E	99.2444	N	36.607	0	0	3055.8	21	4.257	A
Crane No.5	2016-10-02 04:00:36	E	99.2444	N	36.607	0	0	3062.7	20.24	4.255	A
Crane No.5	2016-10-02 05:00:23	E	99.2446	N	36.6069	0	244.5	3131.2	20.24	4.251	A
Crane No.5	2016-10-02 06:00:22	E	99.2442	N	36.6069	0	275.8	3042.5	21.24	4.249	A
Crane No.5	2016-10-02 07:00:22	E	99.2468	N	36.6011	0	191.2	3073.6	22.24	4.246	A
Crane No.5	2016-10-02 08:01:58	E	99.287	N	36.57	0	246.2	3005.3	20.24	4.244	C
Crane No.5	2016-10-02 09:00:36	E	99.2872	N	36.5695	0	12.3	3081.7	22.24	4.246	A
Crane No.5	2016-10-02 10:00:42	E	99.2909	N	36.5685	1.8	108.1	3042.8	25.24	4.26	A
Crane No.5	2016-10-02 11:00:53	E	99.2905	N	36.5692	0	0	3095.4	25	4.279	B
Crane No.5	2016-10-02 12:00:23	E	99.2909	N	36.569	0	0	3064.2	30.24	4.29	A
Crane No.5	2016-10-02 13:00:45	E	99.2917	N	36.5671	0	335	4487.3	30.24	4.299	A
Crane No.5	2016-10-02 14:00:33	E	99.2915	N	36.5683	0	303.5	3094	31.24	4.305	A
Crane No.5	2016-10-02 15:00:36	E	99.2912	N	36.5679	0	55.1	3089.7	30	4.311	A
Crane No.5	2016-10-02 16:00:38	E	99.2914	N	36.5689	0	352.7	3085	26.24	4.312	A
Crane No.5	2016-10-02 17:00:20	E	99.2914	N	36.5683	1.6	275.8	3123.3	25	4.314	A
Crane No.5	2016-10-02 18:00:36	E	99.2913	N	36.5684	0	1.3	3084.9	23	4.315	A
Crane No.5	2016-10-02 19:00:54	E	99.2913	N	36.5686	0	203.1	3087.2	20	4.309	B
Crane No.5	2016-10-02 20:00:16	E	99.2449	N	36.6063	0	0	3065.3	25.24	4.301	A
Crane No.5	2016-10-02 21:00:28	E	99.244	N	36.607	0	282.4	3050.7	22	4.298	A
Crane No.5	2016-10-02 22:00:36	E	99.2444	N	36.6069	0	0	3064	22	4.293	A
Crane No.5	2016-10-02 23:00:13	E	99.2443	N	36.607	0	288.3	3047.8	20	4.288	A
Crane No.5	2016-10-03 00:00:36	E	99.2444	N	36.607	0	344.3	3060.9	21.24	4.285	A
Crane No.5	2016-10-03 01:00:17	E	99.2444	N	36.607	0	112.1	3055	22	4.271	A
Crane No.5	2016-10-03 02:00:17	E	99.2443	N	36.6069	0	288.5	3050.6	22.24	4.27	A
Crane No.5	2016-10-03 03:00:36	E	99.2442	N	36.607	0	290.7	3057.2	22	4.267	A
Crane No.5	2016-10-03 04:00:36	E	99.2442	N	36.607	0	314	3060.9	21	4.263	A
Crane No.5	2016-10-03 05:00:23	E	99.2452	N	36.6064	2.2	306	3195.6	20.24	4.26	A
Crane No.5	2016-10-03 06:00:19	E	99.2443	N	36.607	0	315.1	3056.5	21.24	4.257	A
Crane No.5	2016-10-03 07:01:01	E	99.2688	N	36.5822	36.3	93.3	3054	22	4.255	B
Crane No.5	2016-10-03 08:00:54	E	99.2912	N	36.5676	7.4	294.5	3083.9	25	4.249	B
Crane No.5	2016-10-03 09:00:32	E	99.2925	N	36.5681	2.2	115.5	3042	21.24	4.255	A
Crane No.5	2016-10-03 10:00:36	E	99.2912	N	36.5684	0	254.9	3094.6	24.24	4.27	A
Crane No.5	2016-10-03 11:00:38	E	99.291	N	36.5685	0	0	3068.3	27	4.286	A
Crane No.5	2016-10-03 12:00:45	E	99.2907	N	36.5686	2	251.8	3087.1	28.24	4.295	A
Crane No.5	2016-10-03 13:00:36	E	99.2908	N	36.5687	1.6	20.2	3101.1	30.24	4.302	A
Crane No.5	2016-10-03 14:00:16	E	99.2899	N	36.5694	1.9	317.9	3096.4	28.24	4.307	A
Crane No.5	2016-10-03 15:00:26	E	99.2916	N	36.5847	0	299.6	3085.3	28	4.312	A
Crane No.5	2016-10-03 16:00:41	E	99.2916	N	36.5853	0	65.7	3085.4	27.24	4.312	A
Crane No.5	2016-10-03 17:00:36	E	99.2899	N	36.5692	3.3	152.3	3093.2	25	4.313	A
Crane No.5	2016-10-03 18:00:42	E	99.2891	N	36.5693	0	58.2	3097.4	25	4.312	A
Crane No.5	2016-10-03 19:00:41	E	99.2892	N	36.5695	4.2	0.3	3083.9	24	4.303	A
Crane No.5	2016-10-03 20:00:32	E	99.2444	N	36.6071	0	330.6	3078	21	4.297	A
Crane No.5	2016-10-03 21:00:36	E	99.2443	N	36.607	0	20.1	3064.3	23.24	4.293	A
Crane No.5	2016-10-03 22:00:26	E	99.2441	N	36.6069	0	0	3053.7	22	4.289	A
Crane No.5	2016-10-03 23:00:36	E	99.2441	N	36.607	0	44.9	3067.4	22.24	4.285	A
Crane No.5	2016-10-04 00:00:38	E	99.2443	N	36.607	0	0	3057.3	21	4.28	A
Crane No.5	2016-10-04 01:01:30	E	99.244	N	36.607	0	157.9	3037.9	22	4.266	B
Crane No.5	2016-10-04 02:03:15	E	99.2441	N	36.607	0	296.5	3066.7	22.24	4.261	D
Crane No.5	2016-10-04 03:00:20	E	99.2441	N	36.607	1.8	81.5	3081.7	20	4.25	A
Crane No.5	2016-10-04 04:00:36	E	99.2441	N	36.6069	0	49.3	3069.9	21.24	4.248	A
Crane No.5	2016-10-04 05:00:14	E	99.2442	N	36.6069	0	26	3054.3	20.24	4.245	A
Crane No.5	2016-10-04 06:00:10	E	99.244	N	36.6068	2.4	51.3	3082.8	20.24	4.244	A
Crane No.5	2016-10-04 07:00:16	E	99.2464	N	36.6049	88.5	118.1	3094.9	25	4.242	A
Crane No.5	2016-10-04 08:00:25	E	99.2859	N	36.5728	0	132.4	3113.7	22	4.241	A
Crane No.5	2016-10-04 09:00:36	E	99.285	N	36.5731	0	127.6	3008	22.24	4.268	A
Crane No.5	2016-10-04 10:01:06	E	99.2859	N	36.5759	0	87.5	3123.6	24.24	4.277	B
Crane No.5	2016-10-04 11:00:48	E	99.2842	N	36.5734	0	343.8	3069	25	4.284	B
Crane No.5	2016-10-04 12:00:46	E	99.2847	N	36.5733	0	13.2	3080.8	25	4.289	B
Crane No.5	2016-10-04 13:00:36	E	99.2854	N	36.5729	0	192.1	3071.5	20.24	4.294	A
Crane No.5	2016-10-04 14:00:47	E	99.2817	N	36.5698	0	343.6	760.8	23	4.298	B
Crane No.5	2016-10-04 15:00:20	E	99.2859	N	36.5729	1.9	330.9	3094.3	21.24	4.301	A
Crane No.5	2016-10-04 16:00:36	E	99.2861	N	36.573	0	32	3072.9	20.24	4.304	A
Crane No.5	2016-10-04 17:00:53	E	99.2861	N	36.5727	0	186.5	3083.4	20.24	4.306	B
Crane No.5	2016-10-04 18:00:36	E	99.2861	N	36.5727	1.8	58.1	3071.1	24.24	4.306	A
Crane No.5	2016-10-04 19:00:26	E	99.2855	N	36.5733	1.7	18.1	3105.7	23	4.3	A
Crane No.5	2016-10-04 20:01:00	E	99.2444	N	36.6069	0	0	3078.9	25.24	4.294	B
Crane No.5	2016-10-04 21:00:36	E	99.2445	N	36.6069	0	114.1	3059.2	23	4.287	A
Crane No.5	2016-10-04 22:00:21	E	99.2444	N	36.6069	0	12.7	3067	21.24	4.282	A
Crane No.5	2016-10-04 23:00:21	E	99.2445	N	36.607	0	67	3048	20.24	4.279	A
Crane No.5	2016-10-05 00:00:36	E	99.2444	N	36.607	0	0	3073.6	21	4.275	A
Crane No.5	2016-10-05 01:00:21	E	99.2444	N	36.6068	0	26.9	3073.7	22	4.261	A
Crane No.5	2016-10-05 02:00:36	E	99.2444	N	36.607	0	0	3083.8	21.24	4.26	A
Crane No.5	2016-10-05 03:00:17	E	99.2444	N	36.607	2	301.4	3068.3	20	4.256	A
Crane No.5	2016-10-05 04:00:24	E	99.2445	N	36.6069	0	55.4	3034.3	25.24	4.254	A
Crane No.5	2016-10-05 05:00:36	E	99.2445	N	36.607	0	34.3	3057.9	21	4.251	A
Crane No.5	2016-10-05 06:00:12	E	99.2445	N	36.6071	0	35.6	3045.4	25.24	4.247	A
Crane No.5	2016-10-05 07:00:19	E	99.2551	N	36.5951	1.8	195.5	3065.9	20	4.245	A
Crane No.5	2016-10-05 08:00:21	E	99.2867	N	36.5727	5.4	303.6	3120.3	24	4.245	A
Crane No.5	2016-10-05 09:01:07	E	99.2861	N	36.5727	0	138.8	3058.8	22	4.249	B
Crane No.5	2016-10-05 10:01:24	E	99.2867	N	36.5726	0	163.4	3092.6	23.24	4.255	B
Crane No.5	2016-10-05 11:00:36	E	99.2848	N	36.5762	0	79	3090.7	24.24	4.264	A
Crane No.5	2016-10-05 12:01:11	E	99.2849	N	36.5755	12	211.4	3091.4	28.24	4.282	B
Crane No.5	2016-10-05 13:01:06	E	99.2845	N	36.5755	0	5.4	3073.5	30.24	4.291	B
Crane No.5	2016-10-05 14:00:27	E	99.2842	N	36.5757	0	93.8	2982.1	29	4.298	A
Crane No.5	2016-10-05 15:00:37	E	99.2846	N	36.5755	0	0	3093.2	30	4.304	A
Crane No.5	2016-10-05 16:01:00	E	99.2851	N	36.5763	0	350.2	3095.1	30	4.309	B
Crane No.5	2016-10-05 17:00:43	E	99.2854	N	36.5735	2.9	182.1	3057.6	26	4.311	A
Crane No.5	2016-10-05 18:00:41	E	99.2865	N	36.5727	0	4.4	3072.5	21	4.312	A
Crane No.5	2016-10-05 19:00:36	E	99.2856	N	36.5733	0	283.7	3077.6	25	4.304	A
Crane No.5	2016-10-05 20:00:18	E	99.2447	N	36.607	1.8	137.1	3007	20	4.298	A
Crane No.5	2016-10-05 21:00:14	E	99.2445	N	36.6071	1.9	274.1	3064.9	21	4.294	A
Crane No.5	2016-10-05 22:00:37	E	99.2445	N	36.6071	0	0	3060.7	20.24	4.29	A
Crane No.5	2016-10-05 23:00:14	E	99.2445	N	36.6071	0	0	3067.7	20.24	4.286	A
Crane No.5	2016-10-06 00:00:37	E	99.2445	N	36.6071	0	31.6	3066.1	20	4.282	A
Crane No.5	2016-10-06 01:00:16	E	99.2444	N	36.6071	0	60.5	3054.7	24.24	4.268	A
Crane No.5	2016-10-06 02:00:31	E	99.2448	N	36.607	3.1	110.2	3090	20	4.267	A
Crane No.5	2016-10-06 03:00:36	E	99.2444	N	36.6071	0	32.6	3080.7	21	4.264	A
Crane No.5	2016-10-06 04:00:36	E	99.2445	N	36.6071	0	75.8	3069.2	22	4.261	A
Crane No.5	2016-10-06 05:00:16	E	99.2445	N	36.6071	0	0	3075.7	21	4.258	A
Crane No.5	2016-10-06 06:00:20	E	99.2444	N	36.6071	0	322.8	3059.5	22	4.255	A
Crane No.5	2016-10-06 07:00:19	E	99.2569	N	36.5964	11.7	166	3104.1	23	4.253	A
Crane No.5	2016-10-06 08:00:36	E	99.2845	N	36.5758	0	85.5	3086.8	24	4.251	A
Crane No.5	2016-10-06 09:00:36	E	99.2846	N	36.5757	0	339.2	3031.4	20.24	4.249	A
Crane No.5	2016-10-06 10:01:06	E	99.2845	N	36.576	0	334	3088.2	22.24	4.252	B
Crane No.5	2016-10-06 11:01:23	E	99.284	N	36.5761	5.4	355	3098	21.24	4.271	B
Crane No.5	2016-10-06 12:00:36	E	99.2847	N	36.5759	0	29.8	3089.9	20	4.282	A
Crane No.5	2016-10-06 13:00:36	E	99.2845	N	36.5759	0	3.1	3094.9	24	4.288	A
Crane No.5	2016-10-06 14:00:20	E	99.2845	N	36.5757	0	73.7	3086.6	22.24	4.294	A
Crane No.5	2016-10-06 15:01:06	E	99.2844	N	36.576	1.6	36.3	3049.5	22	4.3	B
Crane No.5	2016-10-06 16:03:03	E	99.3191	N	36.5733	2.3	204.5	532.1	22.24	4.303	D
Crane No.5	2016-10-06 17:00:28	E	99.284	N	36.5759	0	178.9	3107.2	21	4.302	A
Crane No.5	2016-10-06 18:00:31	E	99.2843	N	36.5755	0	81.3	3077.3	25	4.304	A
Crane No.5	2016-10-06 19:00:51	E	99.2845	N	36.5757	0	263	3072.3	23	4.298	B
Crane No.5	2016-10-06 20:00:36	E	99.2444	N	36.6067	0	159	3067.7	20.24	4.289	A
Crane No.5	2016-10-06 21:00:36	E	99.2448	N	36.6071	0	115.7	3064.2	21.24	4.285	A
Crane No.5	2016-10-06 22:00:19	E	99.2447	N	36.6071	2	155.2	3058.4	22.24	4.28	A
Crane No.5	2016-10-06 23:00:36	E	99.2446	N	36.6071	0	173.8	3071.5	22.24	4.277	A
Crane No.5	2016-10-07 00:00:29	E	99.2446	N	36.6071	0	106.3	3072.9	21.24	4.273	A
Crane No.5	2016-10-07 01:00:36	E	99.2446	N	36.6071	0	0	3075.6	21.24	4.259	A
Crane No.5	2016-10-07 02:00:21	E	99.2446	N	36.6071	0	138.6	3064.5	21.24	4.257	A
Crane No.5	2016-10-07 03:00:36	E	99.2446	N	36.607	0	10.5	3072.9	21	4.255	A
Crane No.5	2016-10-07 04:00:36	E	99.2446	N	36.6071	0	108.3	3076.5	21.24	4.251	A
Crane No.5	2016-10-07 05:00:19	E	99.2447	N	36.6071	0	0	3078.2	20	4.247	A
Crane No.5	2016-10-07 06:01:07	E	99.2447	N	36.6071	0	113.7	3061	21	4.245	B
Crane No.5	2016-10-07 07:00:36	E	99.2445	N	36.6071	0	346.4	3059.5	25.24	4.24	A
Crane No.5	2016-10-07 08:00:26	E	99.2567	N	36.5881	0	40	3061.4	22.24	4.237	A
Crane No.5	2016-10-07 09:00:54	E	99.2842	N	36.576	0	321.1	3072.1	22	4.242	B
Crane No.5	2016-10-07 10:00:40	E	99.2843	N	36.5758	3.6	137.3	3076	23	4.243	A
Crane No.5	2016-10-07 11:00:36	E	99.2847	N	36.5758	1.6	97.1	3082.4	20.24	4.269	A
Crane No.5	2016-10-07 12:00:59	E	99.2846	N	36.5759	3.4	185.6	3044.6	20	4.275	B
Crane No.5	2016-10-07 13:00:36	E	99.2839	N	36.5759	0	3.6	3085.9	22.24	4.286	A
Crane No.5	2016-10-07 14:00:36	E	99.2842	N	36.5757	0	61.1	3138.1	21.24	4.293	A
Crane No.5	2016-10-07 15:00:36	E	99.2843	N	36.5759	0	99.7	3078.4	21.24	4.297	A
Crane No.5	2016-10-07 16:01:06	E	99.2842	N	36.5761	3.6	39.2	3070.9	21.24	4.301	B
Crane No.5	2016-10-07 17:00:23	E	99.284	N	36.576	0	0	3077.2	20.24	4.302	A
Crane No.5	2016-10-07 18:00:49	E	99.2843	N	36.5755	0	310.6	3101.4	25	4.303	B
Crane No.5	2016-10-07 19:00:39	E	99.2844	N	36.5758	0	18.6	3098.4	22	4.294	A
Crane No.5	2016-10-07 20:00:18	E	99.2833	N	36.5765	5	178	3074.6	25	4.288	A
Crane No.5	2016-10-07 21:00:36	E	99.2817	N	36.5769	2.2	24.3	3089.7	24.24	4.284	A
Crane No.5	2016-10-07 22:00:29	E	99.2442	N	36.6069	1.6	157	3046.1	25.24	4.279	A
Crane No.5	2016-10-07 23:00:36	E	99.2444	N	36.607	0	1.4	3061.6	21.24	4.275	A
Crane No.5	2016-10-08 00:00:26	E	99.2443	N	36.6069	0	357	3090.6	20.24	4.271	A
Crane No.5	2016-10-08 01:00:36	E	99.2444	N	36.6069	0	93.4	3056	21	4.258	A
Crane No.5	2016-10-08 02:00:28	E	99.2446	N	36.607	0	0	3031.9	20	4.256	A
Crane No.5	2016-10-08 03:00:36	E	99.2442	N	36.607	0	5.5	3069.7	20	4.253	A
Crane No.5	2016-10-08 04:00:11	E	99.2441	N	36.607	0	184.8	3081.2	20.24	4.25	A
Crane No.5	2016-10-08 05:00:44	E	99.2442	N	36.6069	0	336.1	3091	21	4.247	A
Crane No.5	2016-10-08 06:00:36	E	99.2442	N	36.607	0	0	3068.5	21.24	4.244	A
Crane No.5	2016-10-08 07:00:15	E	99.2443	N	36.607	1.5	299.6	3063.4	24	4.24	A
Crane No.5	2016-10-08 08:00:19	E	99.2817	N	36.5769	0	0	3065.9	21.24	4.24	A
Crane No.5	2016-10-08 09:01:00	E	99.2836	N	36.5762	4.7	299.9	3077.3	21.24	4.246	B
Crane No.5	2016-10-08 10:00:55	E	99.2831	N	36.5773	28.9	329.7	3321.6	22.24	4.246	B
Crane No.5	2016-10-08 11:00:45	E	99.2847	N	36.5758	0	53.9	3181.1	24	4.256	A
Crane No.5	2016-10-08 12:01:01	E	99.2843	N	36.5757	0	349.2	3082.9	28	4.263	B
Crane No.5	2016-10-08 13:00:36	E	99.2842	N	36.5758	0	3.6	3077.9	29	4.274	A
Crane No.5	2016-10-08 14:00:24	E	99.2827	N	36.5757	0	325.3	3086.8	28.24	4.281	A
Crane No.5	2016-10-08 15:01:02	E	99.2844	N	36.5758	0	23.9	3068.8	26.24	4.293	B
Crane No.5	2016-10-08 16:00:24	E	99.2841	N	36.576	1.6	208.4	3094.8	27	4.297	A
Crane No.5	2016-10-08 17:00:46	E	99.284	N	36.5756	3.1	267.7	3050.8	27	4.301	B
Crane No.5	2016-10-08 18:00:47	E	99.2844	N	36.5758	2.8	138.2	3101.3	22	4.297	B
Crane No.5	2016-10-08 19:00:36	E	99.2843	N	36.5758	0	65.9	3081.1	20.24	4.29	A
Crane No.5	2016-10-08 20:00:17	E	99.2441	N	36.6069	5.1	168.1	3061.1	22.24	4.284	A
Crane No.5	2016-10-08 21:00:36	E	99.2441	N	36.6067	0	264.4	3086.6	21.24	4.281	A
Crane No.5	2016-10-08 22:00:21	E	99.2443	N	36.6068	0	23.9	3081.8	22	4.277	A
Crane No.5	2016-10-08 23:00:36	E	99.2443	N	36.6068	0	86.8	3076	21.24	4.274	A
Crane No.5	2016-10-09 00:02:36	E	99.2443	N	36.6069	4	39.9	3065.4	22	4.269	C
Crane No.5	2016-10-09 01:00:36	E	99.2443	N	36.6069	0	163	3081.4	21	4.246	A
Crane No.5	2016-10-09 02:00:27	E	99.2442	N	36.6069	0	0	3070.4	22	4.246	A
Crane No.5	2016-10-09 03:00:20	E	99.2442	N	36.6069	0	0	3074.9	21.24	4.243	A
Crane No.5	2016-10-09 04:00:37	E	99.2442	N	36.6067	0	225.9	3009.8	20	4.241	A
Crane No.5	2016-10-09 05:00:36	E	99.2443	N	36.6068	0	319.4	3083.7	21.24	4.238	A
Crane No.5	2016-10-09 06:00:36	E	99.2441	N	36.6069	0	0	3066.6	21	4.235	A
Crane No.5	2016-10-09 07:00:19	E	99.2441	N	36.6067	3	182.1	3054.8	25.24	4.232	A
Crane No.5	2016-10-09 08:02:09	E	99.2809	N	36.5771	0	2.1	3084.2	20	4.23	C
Crane No.5	2016-10-09 09:00:26	E	99.2819	N	36.5766	0	97.7	3095.5	25	4.228	A
Crane No.5	2016-10-09 10:00:59	E	99.2814	N	36.5768	0	71.7	3092.1	21	4.251	B
Crane No.5	2016-10-09 11:00:16	E	99.2815	N	36.5765	0	276.2	3081.1	25.24	4.272	A
Crane No.5	2016-10-09 12:01:00	E	99.2842	N	36.5759	0	99.5	3083.7	23	4.28	B
Crane No.5	2016-10-09 13:00:29	E	99.2841	N	36.5759	1.7	243	3057.6	23	4.289	A
Crane No.5	2016-10-09 14:00:25	E	99.2844	N	36.5757	0	285.8	3096.1	25.24	4.294	A
Crane No.5	2016-10-09 15:00:38	E	99.2845	N	36.5757	0	178.9	3109	23.24	4.299	A
Crane No.5	2016-10-09 16:00:54	E	99.2847	N	36.5757	1.7	133.1	3066.6	23	4.303	B
Crane No.5	2016-10-09 17:00:19	E	99.2847	N	36.5758	0	0	3086.7	20	4.305	A
Crane No.5	2016-10-09 18:00:37	E	99.2846	N	36.5758	0	0	3088.6	24.24	4.306	A
Crane No.5	2016-10-09 19:00:40	E	99.2846	N	36.5759	0	102.4	3075.5	23.24	4.298	A
Crane No.5	2016-10-09 20:00:19	E	99.284	N	36.5762	0	44.8	3052.7	25.24	4.291	A
Crane No.5	2016-10-09 21:00:53	E	99.2442	N	36.6071	1.7	282.4	3066.9	25.24	4.288	B
Crane No.5	2016-10-09 22:00:36	E	99.2442	N	36.607	0	0	3064.3	21.24	4.282	A
Crane No.5	2016-10-09 23:00:24	E	99.2443	N	36.6071	1.7	40.1	3078.6	25.24	4.277	A
Crane No.5	2016-10-10 00:00:35	E	99.2441	N	36.6069	0	73.5	3071.5	20.24	4.273	A
Crane No.5	2016-10-10 01:00:12	E	99.244	N	36.607	1.7	39.8	3500.6	20	4.26	A
Crane No.5	2016-10-10 02:00:36	E	99.2442	N	36.607	0	0	3072.7	21.24	4.259	A
Crane No.5	2016-10-10 03:00:24	E	99.2443	N	36.6071	0	34.6	3051.9	21.24	4.256	A
Crane No.5	2016-10-10 04:00:36	E	99.2443	N	36.607	0	71.9	3061.1	21.24	4.253	A
Crane No.5	2016-10-10 05:00:34	E	99.2443	N	36.607	0	11.4	3065.5	20	4.249	A
Crane No.5	2016-10-10 06:00:26	E	99.2442	N	36.607	0	0	3060.5	21.24	4.246	A
Crane No.5	2016-10-10 07:00:21	E	99.244	N	36.607	0	284.3	3035.2	20	4.243	A
Crane No.5	2016-10-10 08:01:57	E	99.2475	N	36.5922	0	111.2	3064.3	20	4.24	C
Crane No.5	2016-10-10 09:00:45	E	99.2848	N	36.5756	1.6	118.7	3119.2	20	4.235	A
Crane No.5	2016-10-10 10:01:00	E	99.2845	N	36.5757	0	143.7	3086.4	22	4.24	B
Crane No.5	2016-10-10 11:00:36	E	99.2844	N	36.5736	0	321	3080.2	23	4.243	A
Crane No.5	2016-10-10 12:00:26	E	99.2828	N	36.5762	0	305.5	3078.1	23.24	4.262	A
Crane No.5	2016-10-10 13:00:24	E	99.2826	N	36.5762	3.9	272.4	3070.3	24.24	4.278	A
Crane No.5	2016-10-10 14:01:30	E	99.2836	N	36.5763	0	220	3098.5	25.24	4.288	B
Crane No.5	2016-10-10 15:00:19	E	99.2839	N	36.5762	1.6	321.7	3062.9	23.24	4.293	A
Crane No.5	2016-10-10 16:00:45	E	99.2843	N	36.5763	0	191.1	3091.6	23.24	4.298	A
Crane No.5	2016-10-10 17:00:36	E	99.2848	N	36.5752	17.3	172.4	3122	20.24	4.301	A
Crane No.5	2016-10-10 18:01:30	E	99.2846	N	36.5758	0	57.6	3075.4	21	4.302	B
Crane No.5	2016-10-10 19:00:21	E	99.2846	N	36.5761	0	0	3127.8	22.24	4.289	A
Crane No.5	2016-10-10 20:00:28	E	99.2349	N	36.6143	0	22.1	3034.3	24	4.285	A
Crane No.5	2016-10-10 21:00:35	E	99.2443	N	36.6069	0	0	3066.9	20.24	4.28	A
Crane No.5	2016-10-10 22:00:36	E	99.2442	N	36.607	0	323.1	3044.7	21.24	4.276	A
Crane No.5	2016-10-10 23:00:26	E	99.2441	N	36.6071	0	32.1	3063.9	21	4.271	A
Crane No.5	2016-10-11 00:00:36	E	99.2444	N	36.6071	0	252.1	3089.8	22	4.268	A
Crane No.5	2016-10-11 01:00:19	E	99.2443	N	36.607	0	291.8	3064	21	4.256	A
Crane No.5	2016-10-11 02:00:50	E	99.245	N	36.6067	0	0	3174	21.24	4.254	B
Crane No.5	2016-10-11 03:00:36	E	99.2442	N	36.607	0	249.2	3067.6	21.24	4.25	A
Crane No.5	2016-10-11 04:00:22	E	99.2439	N	36.6072	3	313.8	3056.8	21	4.247	A
Crane No.5	2016-10-11 05:00:21	E	99.244	N	36.6071	0	312.7	3047.6	20	4.244	A
Crane No.5	2016-10-11 06:00:36	E	99.2442	N	36.607	0	0	3076.4	21.24	4.241	A
Crane No.5	2016-10-11 07:00:36	E	99.2441	N	36.6071	1.7	304	3051.5	20.24	4.238	A
Crane No.5	2016-10-11 08:00:21	E	99.2475	N	36.5919	6.6	310.8	3053.9	24.24	4.234	A
Crane No.5	2016-10-11 09:00:36	E	99.2807	N	36.5768	0	83.5	3085.1	20	4.234	A
Crane No.5	2016-10-11 10:00:32	E	99.2805	N	36.5771	0	223.9	3083.3	22	4.236	A
Crane No.5	2016-10-11 11:00:36	E	99.2806	N	36.5771	0	42.5	3098.3	23	4.251	A
Crane No.5	2016-10-11 12:00:19	E	99.2798	N	36.5774	0	304.3	3102.2	20.24	4.268	A
Crane No.5	2016-10-11 13:00:22	E	99.28	N	36.5778	1.6	346.8	3098.1	21	4.28	A
Crane No.5	2016-10-11 14:01:19	E	99.2798	N	36.5776	6.6	1.6	3065.2	23	4.287	B
Crane No.5	2016-10-11 15:00:37	E	99.2795	N	36.5781	0	212.1	3102	20.24	4.291	A
Crane No.5	2016-10-11 16:04:10	E	99.2837	N	36.5782	0	0	2202.2	24.24	4.294	D
Crane No.5	2016-10-11 17:05:30	E	99.2795	N	36.5781	0	247.4	3079.6	23.24	4.291	D
Crane No.5	2016-10-11 18:00:37	E	99.2795	N	36.5783	0	171.8	3084.1	25.24	4.276	A
Crane No.5	2016-10-11 19:00:20	E	99.2795	N	36.5781	0	125.4	3066.4	23.24	4.269	A
Crane No.5	2016-10-11 20:00:31	E	99.2442	N	36.6067	0	199.9	3068.1	25	4.265	A
Crane No.5	2016-10-11 21:00:37	E	99.2442	N	36.6067	0	290.7	3069.7	23	4.262	A
Crane No.5	2016-10-11 22:01:36	E	99.2442	N	36.6068	0	310.4	3089.6	22	4.258	C
Crane No.5	2016-10-11 23:00:22	E	99.244	N	36.6067	0	298.9	3064	20.24	4.251	A
Crane No.5	2016-10-12 00:00:54	E	99.2442	N	36.6068	4.1	235.3	3074.1	21	4.248	B
Crane No.5	2016-10-12 01:00:20	E	99.2445	N	36.6069	0	344.7	3081.1	20	4.233	A
Crane No.5	2016-10-12 02:00:36	E	99.2441	N	36.6067	0	219.3	3061.2	22	4.233	A
Crane No.5	2016-10-12 03:00:19	E	99.2444	N	36.6066	0	184.3	3098.9	22.24	4.23	A
Crane No.5	2016-10-12 04:00:36	E	99.2442	N	36.6067	0	208.1	3039.4	22.24	4.228	A
Crane No.5	2016-10-12 05:00:26	E	99.2442	N	36.6068	1.5	128.4	3065.2	22.24	4.225	A
Crane No.5	2016-10-12 06:01:21	E	99.2445	N	36.6068	0	289.8	3088.9	22.24	4.222	B
Crane No.5	2016-10-12 07:00:54	E	99.2442	N	36.6068	1.9	168.4	3060.8	20.24	4.217	B
Crane No.5	2016-10-12 08:00:23	E	99.2853	N	36.5754	8.9	126.3	3078.4	24.24	4.213	A
Crane No.5	2016-10-12 09:00:37	E	99.2854	N	36.5754	0	323	3079.4	25.24	4.22	A
Crane No.5	2016-10-12 10:00:57	E	99.2853	N	36.5748	0	15.2	3120.5	22	4.233	B
Crane No.5	2016-10-12 11:00:36	E	99.2858	N	36.5752	0	0	3074.3	23	4.262	A
Crane No.5	2016-10-12 12:00:21	E	99.2862	N	36.5754	7.5	21.6	3064.7	25.24	4.276	A
Crane No.5	2016-10-12 13:00:36	E	99.2861	N	36.575	0	0	3067.3	26.24	4.286	A
Crane No.5	2016-10-12 14:00:23	E	99.2861	N	36.5787	2.1	320.4	3089.5	28	4.292	A
Crane No.5	2016-10-12 15:00:39	E	99.2883	N	36.5789	0	322	3076.9	25	4.295	A
Crane No.5	2016-10-12 16:04:34	E	99.288	N	36.5787	0	30.7	2799.3	22.24	4.293	D
Crane No.5	2016-10-12 17:00:18	E	99.2881	N	36.5786	2.5	156.2	3073.6	20.24	4.277	A
Crane No.5	2016-10-12 18:00:36	E	99.2827	N	36.5765	0	92.9	3095.2	20	4.275	A
Crane No.5	2016-10-12 19:00:18	E	99.2827	N	36.5769	0	105.8	3055.9	24	4.269	A
Crane No.5	2016-10-12 20:00:24	E	99.2828	N	36.5769	0	67	3089.7	24	4.266	A
Crane No.5	2016-10-12 21:00:36	E	99.2826	N	36.5771	0	0	3088.6	24	4.262	A
Crane No.5	2016-10-12 22:00:36	E	99.2821	N	36.577	0	78.7	3069.2	20	4.258	A
Crane No.5	2016-10-12 23:00:25	E	99.2836	N	36.576	0	261.7	3072.6	25.24	4.255	A
Crane No.5	2016-10-13 00:00:36	E	99.2838	N	36.576	0	324	3073.6	22.24	4.252	A
Crane No.5	2016-10-13 01:00:19	E	99.2836	N	36.576	3.6	278.3	3063.9	21	4.239	A
Crane No.5	2016-10-13 02:00:36	E	99.2838	N	36.576	0	135	3076.1	20	4.238	A
Crane No.5	2016-10-13 03:00:27	E	99.2837	N	36.5759	3.1	271.7	3064.5	21	4.235	A
Crane No.5	2016-10-13 04:01:46	E	99.2838	N	36.5759	0	337	3078.8	21.24	4.233	C
Crane No.5	2016-10-13 05:00:19	E	99.2839	N	36.576	0	125.2	3077.7	20	4.225	A
Crane No.5	2016-10-13 06:00:48	E	99.2838	N	36.5761	0	75	3076	21.24	4.223	B
Crane No.5	2016-10-13 07:00:27	E	99.2839	N	36.576	0	283.5	3064	20.24	4.22	A
Crane No.5	2016-10-13 08:00:44	E	99.2843	N	36.5761	2.2	30.6	3063.9	25	4.217	A
Crane No.5	2016-10-13 09:00:38	E	99.2841	N	36.576	0	0	3052.4	22	4.216	A
[truncated: 2,422 more rows]
